# Supplementary material
Source: PubMed Central journal article supplement (PMC9892777)
Supplement: mmc1.pdf [file mmc1.pdf]

**Supplemental information**

**Bi-allelic variants in *NAE1* cause intellectual disability, ischiopubic hypoplasia, stress-mediated lymphopenia and neurodegeneration**

**Irena J.J. Muffels, Imre F. Schene, Holger Rehmann, Maarten P.G. Massink, Maria M. van der Wal, Corinna Bauder, Martha Labeur, Natalia G. Armando, Maarten H. Lequin, Michiel L. Houben, Jaques C. Giltay, Saskia Haitjema, Albert Huisman, Fleur Vansenne, Judith Bluvstein, John Pappas, Lala V. Shailee, Yuri A. Zarate, Michal Mokry, Gijs W. van Haften, Edward E.S. Nieuwenhuis, Damian Refojo, Femke van Wijk, Sabine A. Fuchs, and Peter M. van Hasselt**

## **Supplemental Note: Detailed case reports of individuals with *NAE1* genetic variants.**

### **Individual 1:**

The first individual is the second child of healthy, Dutch, non-consanguineous parents. During pregnancy, the girl was diagnosed with an aortic coarctation and a ventricular septal defect. After birth, several craniofacial dysmorphias were noted. She has underdeveloped denture and a strikingly asymmetrical palate. During infancy, failure to thrive, generalized hypotonia, mild developmental delay and feeding difficulties were noted. At the age of one she was admitted to the ICU due to a lower respiratory tract infection, which was treated with antibiotics and dexamethasone. This admission was followed by a loss of milestones and a debut of profound therapy resistant epilepsy. Brain MRI, which had been normal, now revealed brain atrophy as evidenced by enlarged ventricles, diminished white matter volume and a thin corpus callosum. Laboratory tests revealed lymphopenia, leukopenia, hyperglycemia, AST, ALT and AF increase, anemia and decreased immunoglobulin levels. Other laboratory values were within normal range. Currently, her development is still severely delayed. She cannot sit without support; she can produce a few sounds but no words.

### **Individual 2:**

Individual 2, is the first child of healthy, Dutch parents. His parents come from a region with known inbred population and cannot rule out distant relatedness. During pregnancy, he received multiple blood transfusions due to hemolysis as a result of rhesus incompatibility. At birth, craniofacial dysmorphias were noted: widely spaced eyes, a long small face, cheiloschisis, and an asymmetrical palate. His development was normal until the age of 14-months (rolling over at 7 months, sitting at 10 months). At 14 months, he was admitted to the ICU with severe pneumonia, and he was treated with antibiotics and dexamethasone. After ICU admission his development declined, he could not sit without support anymore. After initial regression, he slowly started to regain some of his developmental progress. Eventually, at two and a half years of age he was able to walk. Brain MRI showed diminished white matter volume, and thin corpus callosum. Laboratory tests revealed mild leukopenia and low immunoglobulin levels (G1, G2, G3 and M). He did not develop normal antibody titers after vaccination. During infections, lymphocytopenia and leukopenia were observed. He has recurrent episodes of Impetigo and HSV-1 infection, which can be severe. Currently, he can sit, walk and communicate verbally (produce complete sentences).

### **Individual 3:**

Individual 3 was born as the first child to healthy, consanguineous (first-degree cousins) parents. Pregnancy and birth were unremarkable. As an infant, plagiocephaly, sleep difficulties, hyporeflexia, low muscle tone and spasms were noted. For the spasms, he was first treated with Levetiracetam, but this was ineffective. He was then given

ACTH with resolution of the infantile spasms. He had lost developmental milestones with the spasms but regained some of them after 6-weeks of ACTH treatment. His EEG showed interictal tracing with generalized background slowing and multifocal epileptiform discharges. Brain MRI showed severe, diffuse white matter volume loss. At 14 months of age, his development was still delayed. He could roll, but could not sit unassisted, he could say about 3 words with meaning. At 2.5 years of age, he can roll, sit with support, vocalize, and knows parents from strangers. With vigabatrin (113 mg/kg/day), his epilepsy is treated effectively. On physical examination, three small hyperpigmented lesions (right abdomen and left leg) were noted.

#### Individual 4:

Individual 4 was born after normal pregnancy to healthy, non- consanguineous parents. After birth, anteverted nares, large appearing ears, epicanthal folds, narrow palpebral fissures were noted, together with limited range of motion at the elbows, knees and feet. As an infant, she developed epilepsy, and it became clear that her development was severely delayed. Seizures and development worsened significantly during and after infections accompanied by fever. She had multiple respiratory infections, urinary tract infections and bacteremia's, for which she was admitted to the hospital repeatedly. Brain MRI performed at the age of 4.5 years showed progressive global volume loss (compared to earlier brain MRI taken at age 2.5), with marked ventriculomegaly, thinning of the white matter and the corpus callosum, and decreased cerebral cortex volume.

**Figure S1: Analysis of bulk RNA sequencing data.**

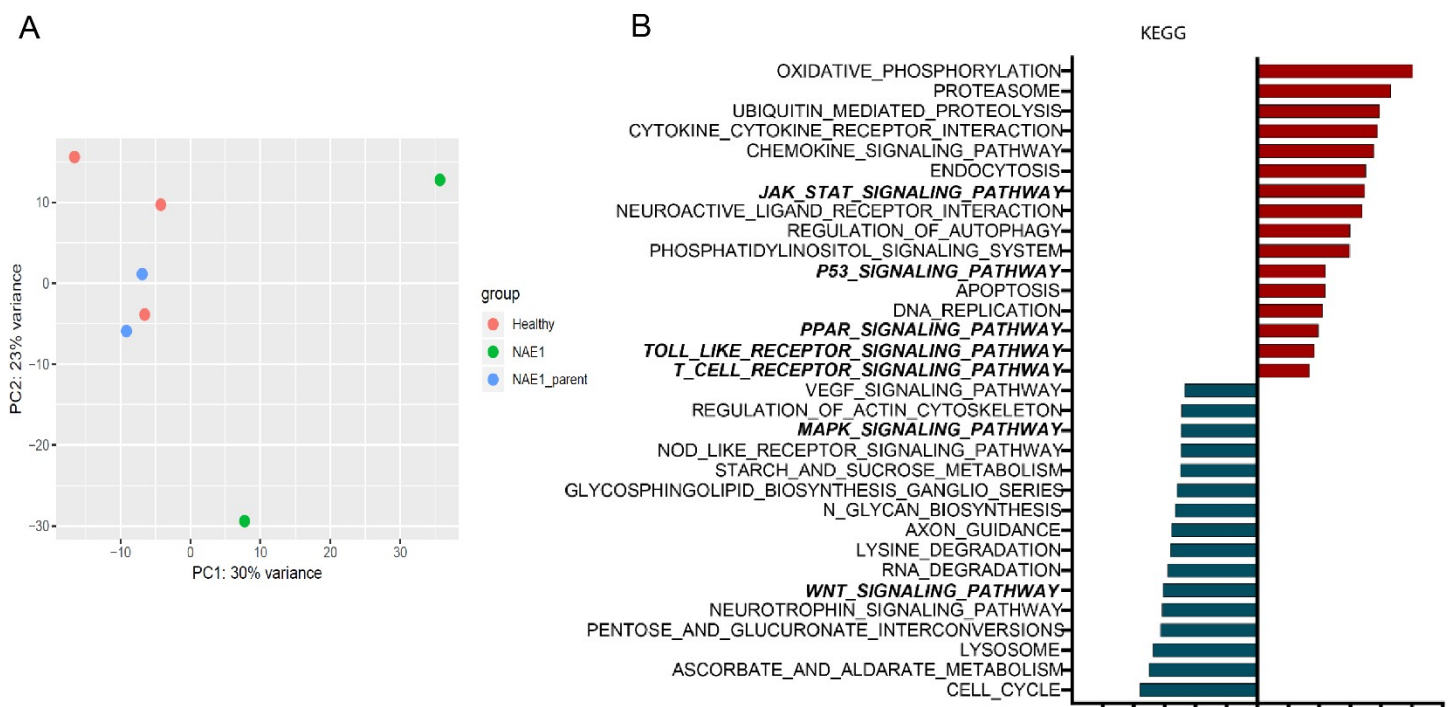

**Figure S1:** Analysis of bulk RNA sequencing data of individual 1 and individual 2 dermal fibroblasts, parents of individual 1 (heterozygous carriers), and three healthy controls. (A) PCA plot based on the top 2000 differentially expressed genes. (B) Pre-ranked Gene Set Enrichment analysis showing the top 32 significantly enriched (FDR<0.05) pathways (KEGG). Y-axis shows Normalized Enrichment Score (NES).

**Figure S2: Gating strategy of flow cytometry experiments.**

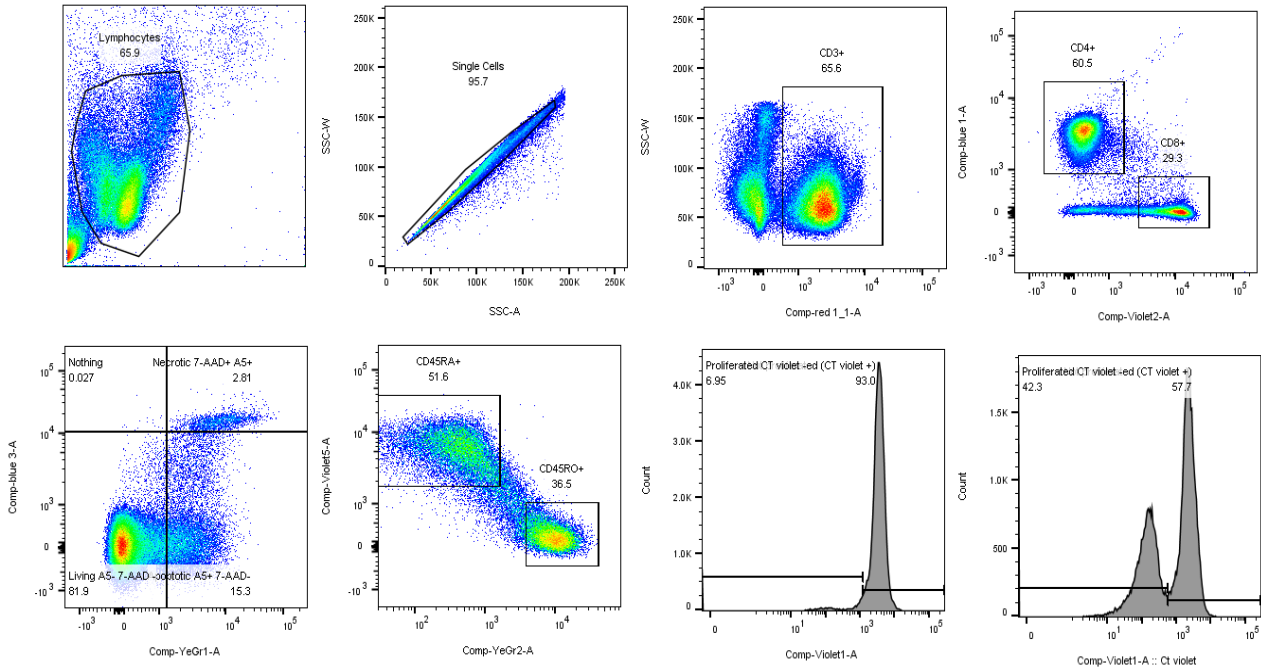

**Figure S2: Flow Cytometry Gating Strategy.** Lymphocytes were gated using FSC-A and SSC-A. Single cells were gated using SSC-A and SSC-W. Next, CD3, CD4, CD8, CD45RA, CD45RO cells were gated. Living cells were gated using Annexin V and 7-AAD staining.

**Figure S3: Imagestream Gating Strategy.**

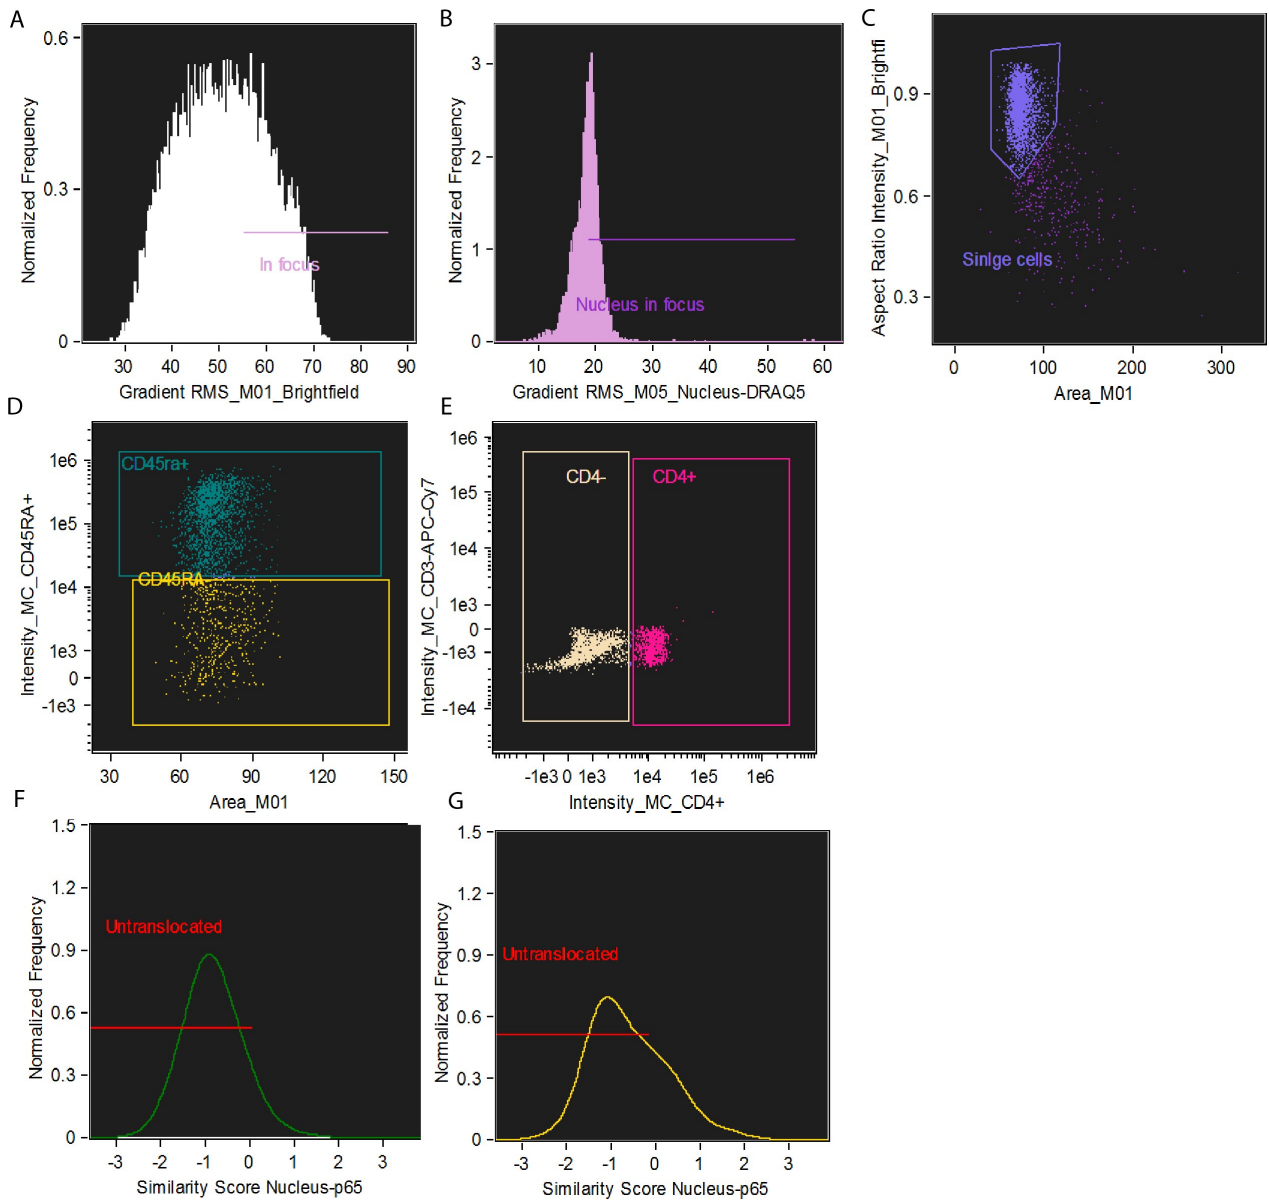

**Figure S3: Imagestream Gating Strategy.** (A) Using the Brightfield channel, cells out of focus were discarded (Gradient\_RMS\_M01). (B) Next, cells in focus in the nuclear channel were gated (Gradient\_RMS\_M05, nuclear channel). (C) Single cells were gated using brightfield Area\_M01 and Aspect\_Ratio\_M01. (D) Next, cells were gated on CD45RA and CD4 expression. (E) The bottom two images show unstimulated CD3 cells (left side, green line). Every similarity score with a value below 0 is gated as untranslocated (red line). (F) The bottom right image shows an example of stimulated CD3+ cells (yellow line).

**Figure S4:** Western blots and RNA sequencing data of individuals with *NAE1* genetic variants.

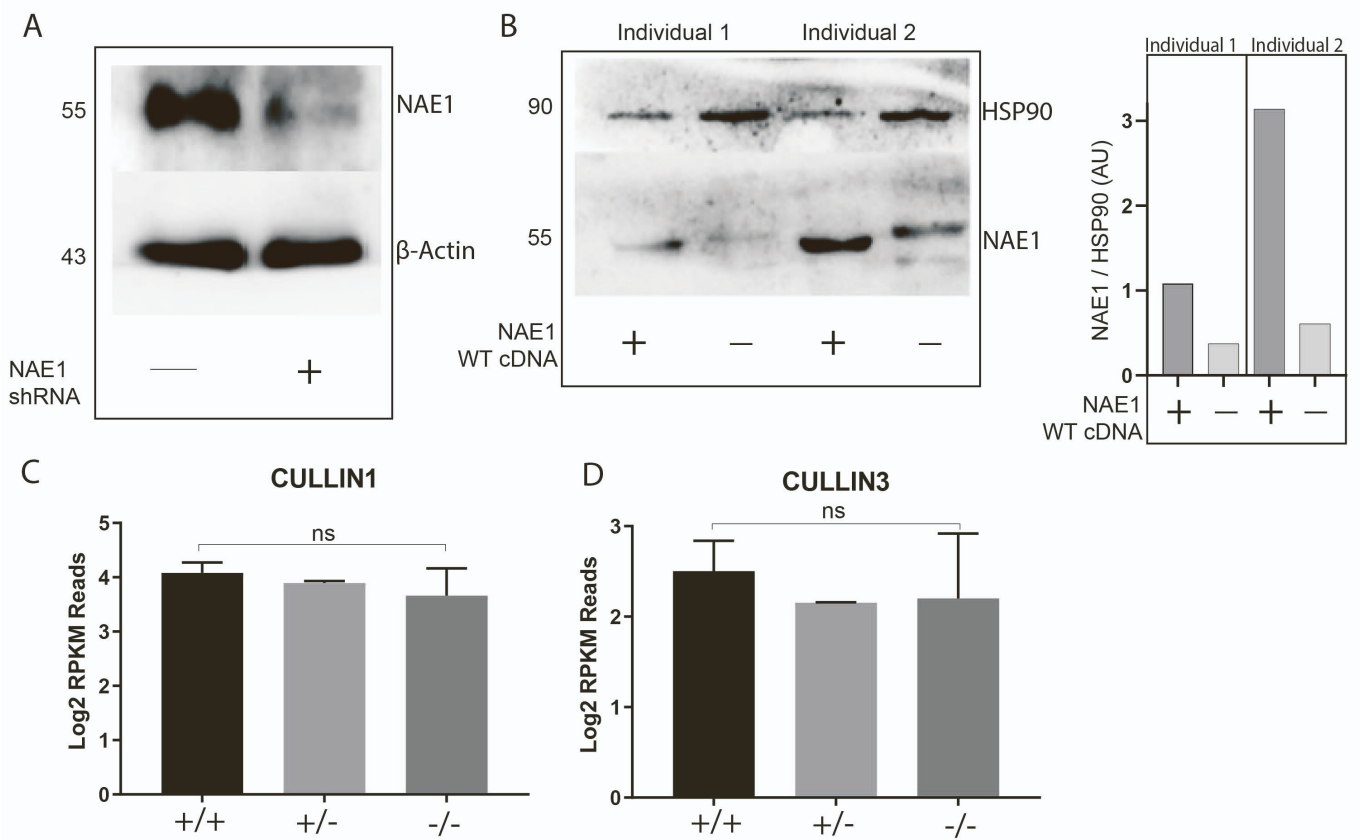

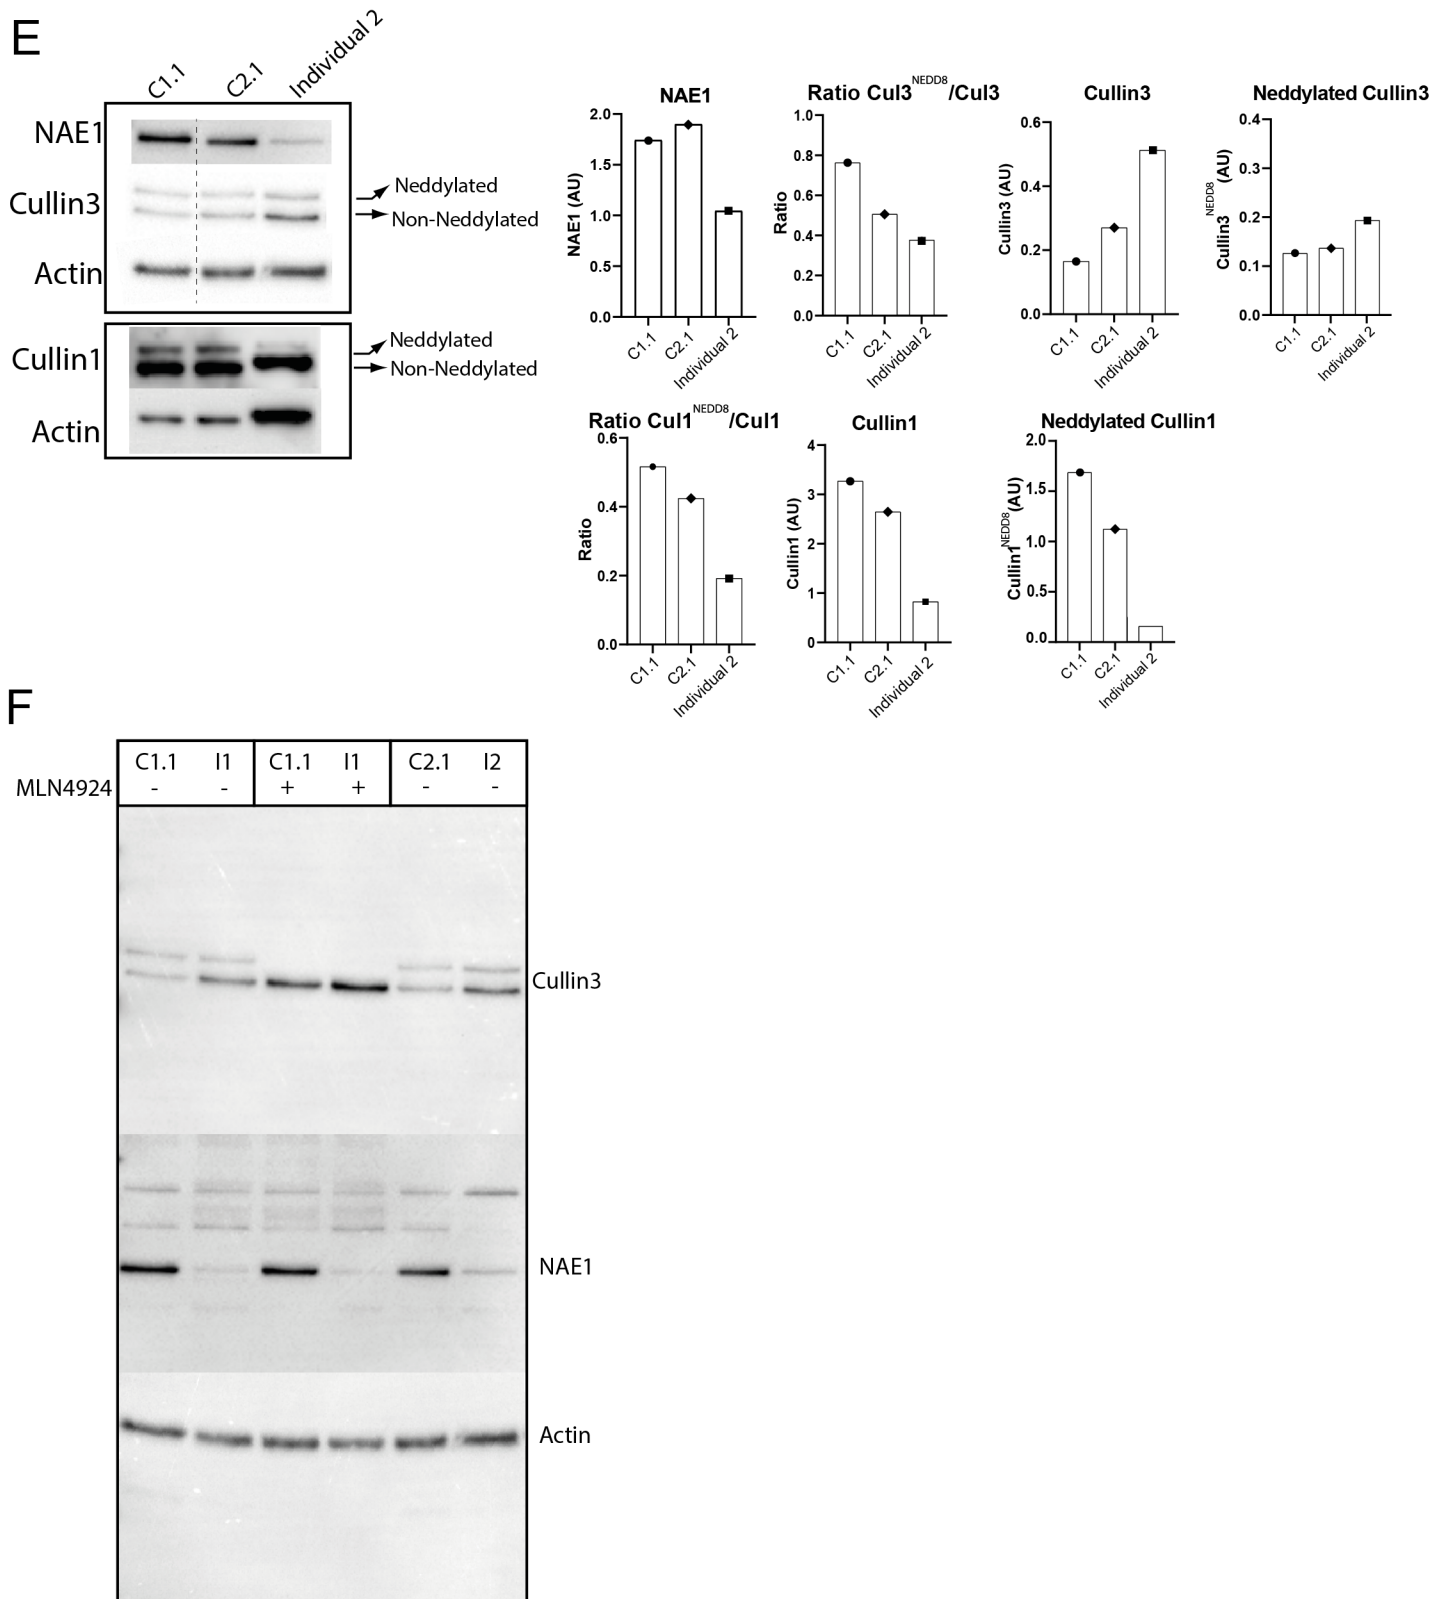

**Figure S4:** (A) Western blot showing NAE1 abundance in heterozygous carriers of NAE1 genetic variants (parents of individual 1) with and without addition of NAE1 shRNA.  $\beta$ -actin was used as a housekeeper. (B) Western blot showing NAE1 protein levels in individual 1 and individual 2 with and without vector expressing NAE1 wildtype cDNA ('rescue'). HSP90 was used as a housekeeper. The quantification of the blots is shown in bar graphs. Quantification was performed using ImageLab (Biorad). (C, D) CULLIN1 and CULLIN3 log2 RPKM reads derived from fibroblast RNA sequencing data. Bar shows mean log2 RPKM reads of all donors (+/+ N=3, +/- N=2, -/- N=2). Error bars show SD of the log2 RPKM reads. (E) Western blot showing cullin1, cullin3 and NAE1 abundance in two controls (C1.1 and C2.1) and individual 2. The bar graphs show the quantification of the blots, all normalized to actin. Quantification was performed using ImageLab. The dotted line indicates where the blots were cut. Quantification was performed using ImageLab. (F) Uncropped blots used for Figure S4F (NAE1, actin and cullin3).

**Figure S5: Conservation of the residues altered in individuals with *NAE1* genetic variants.**

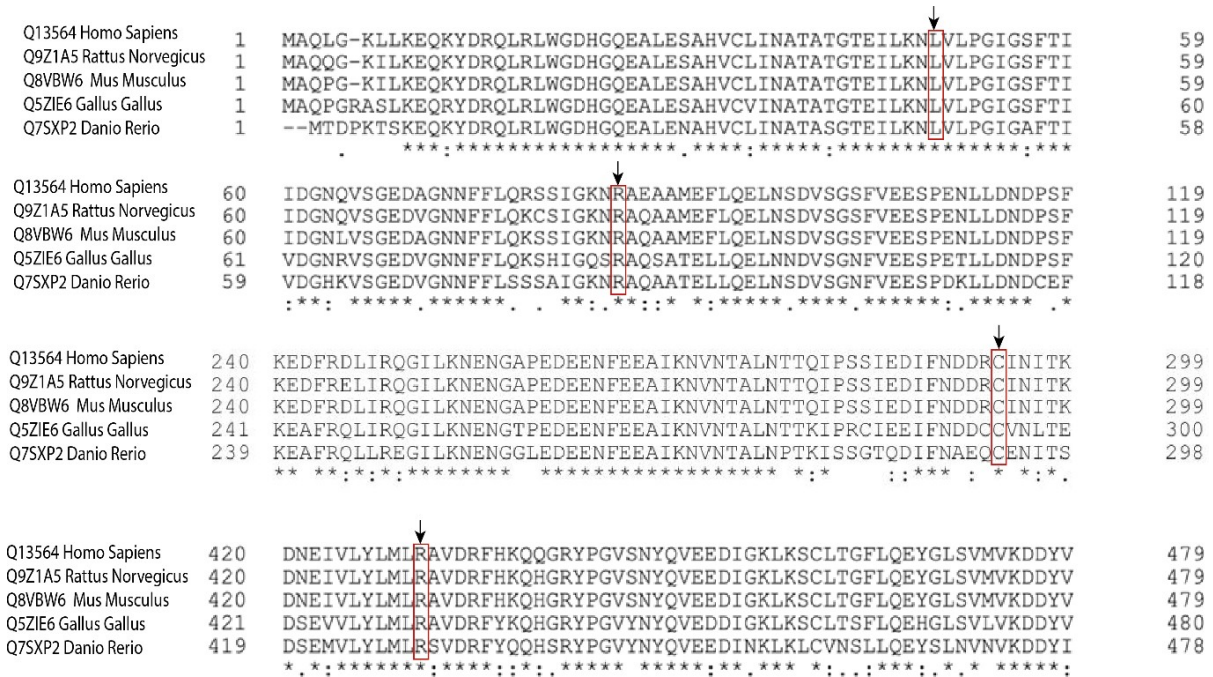

**Figure S5:** Showing conservation of the residues altered in individuals with *NAE1* genetic variants: Leu49, (top row), Arg85 (second row), Cys294 (third row) and Arg430 (bottom row). All residues are conserved in other species (rat, mouse, chick, zebrafish) that express *NAE1* (ULA1).

**Figure S6: Proliferation levels are similar between individuals and healthy controls.**

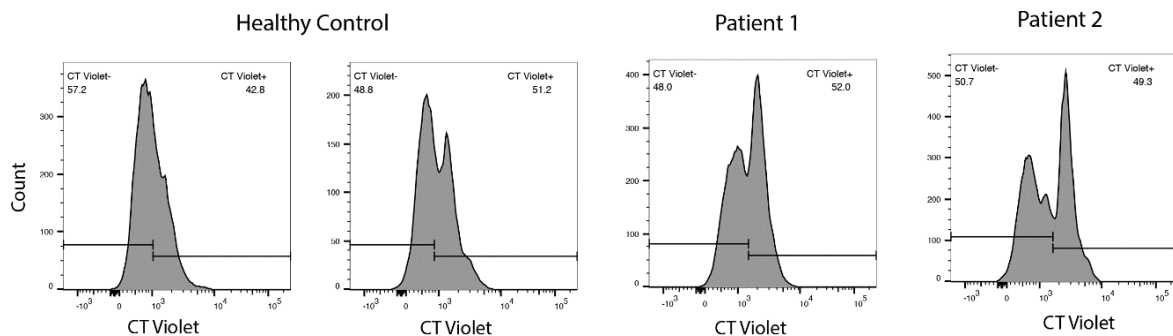

**Supplementary Figure S6:** CD3+ lymphocytes were stained with 2uM CellTrace Violet (Thermofisher) and stimulated with soluble anti-CD3+ (Life technologies, clone OKT3) and anti-CD28+ (Thermofisher) at 1 ug/ml for 3 days. With every cell division, the intensity of CellTrace Violet diminishes. Gating was performed based on the CT violet staining intensity at day zero. Proliferation was similar in healthy controls and individuals with *NAE1* genetic variants (p=0.5).



**Supplementary Figure S7: Representative example of microscopic images taken after MG132 treatment in a healthy control and individual 1.**

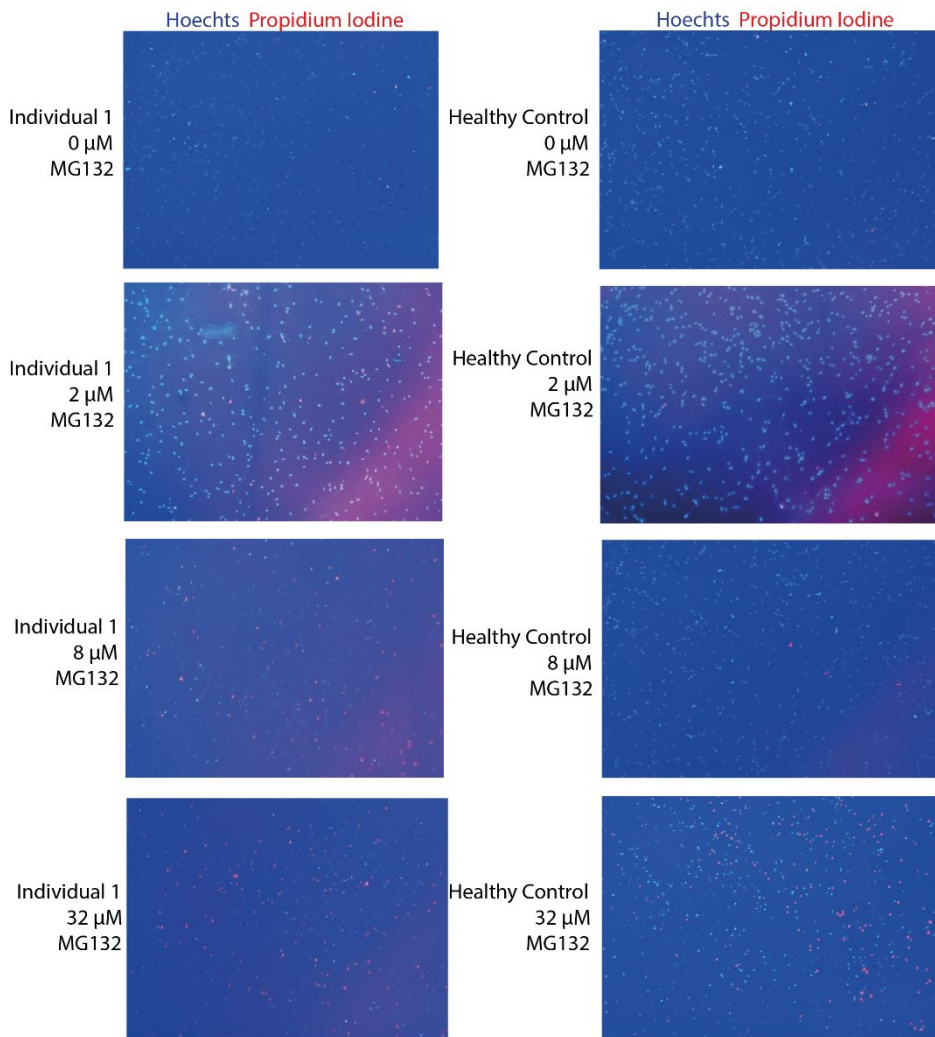

**Supplementary Figure S7:** Representative example of microscopic images taken after MG132 treatment in a healthy control and individual 1. Staining was performed by incubating fibroblasts with Hoechts (1:2000) and PI (1:20) for 5 minutes. Cell death was calculated by dividing the number of PI positive cells by the total number of cells.

**Table S1:** Overview of genetic variants identified with WES (after filtering) in individual 1.

| Gene           | Mode of inheritance   | Variant                                                      | GnomAD                                                                             | CADD Score | PolyPhen-2                 | Mutation Taster                                         | Prediction                      |
|----------------|-----------------------|--------------------------------------------------------------|------------------------------------------------------------------------------------|------------|----------------------------|---------------------------------------------------------|---------------------------------|
| <i>NAE1</i>    | Compound heterozygous | NM_003905.4:<br>c.147G>C<br>p.Leu49Phe<br>Nonsynonymous      | pLI=0, 1x reported in GnomAD.                                                      | 31.        | Probably damaging (0.99).  | Disease Causing<br>Might Introduce splice site changes. | Variant of Unknown Significance |
| <i>NAE1</i>    | Compound heterozygous | NM_003905.4:<br>c.254G>A,<br>p.Arg85Gln<br>Nonsynonymous     | pLI=0, 4x reported in GnomAD.                                                      | 24         | Probably Damaging (0.99).  | Disease Causing                                         | Variant of Unknown Significance |
| <i>TASOR</i>   | Compound heterozygous | NM_001112736.2<br>c.1840T>A,<br>p.Leu614Ile<br>Nonsynonymous | pLI=1<br>Reported 318x in GnomAD.<br>MAF $\geq$ 0.001                              | 23.1       | Possibly Damaging (0.615). | Disease Causing                                         | Benign (BS1, BS2)               |
| <i>TASOR</i>   | Compound heterozygous | NM_001112736.2<br>c.3094A>G<br>p.Ile1032Val<br>Nonsynonymous | pLI = 1.<br>Reported 36x in GnomAD.<br>MAF <0.001.                                 | 16         | Benign (0.003).            | Polymorphism.                                           | Benign (BS1, BS2)               |
| <i>PIWIL2</i>  | De Novo               | NM_00113572<br>1.2c.1899C>T,<br>p.Gly633=<br>Synonymous      | pLI=0.                                                                             | 10.5       | NA                         | Disease Causing, introduces a cryptic splice site       | Likely benign (BP1, BP5).       |
| <i>DPY19L4</i> | De novo               | NM_181787.3<br>c.1338T>C<br>p.Gly446=<br>Synonymous          | GnomAD:<br>pLI=0<br>3x reported:<br>other missense variant at the same AA position | 3.5        | NA                         | Disease Causing, Introduces Splice site changes.        | Likely benign (BP1, BP5)        |

**Table S1:** Overview of genetic variants identified after filtering in individual 1 with Whole Exome Sequencing (WES). Filtering methods can be found in the methods section. The genetic variants are sorted based on Combined Annotation Dependent Depletion (CADD) score (high-low). The 'Prediction' Column represents the likelihood of pathogenicity based on the "Standards and Guidelines for the Interpretation of Sequence Variants" drafted by the American College of Medical Genetics and Genomics (ACMG). (1) Additionally, MutationTaster(2), PolyPhen-2(3), CADD(4) score and GnomAD constraint metrics(5) (Probability of loss of function intolerance, pLI) were used. To indicate the likelihood of pathogenicity, we employed a color scheme. For CADD scores, values 0-10 were colored green, 10-20 were colored yellow and values >20 were colored red. For Polyphen-2, probably damaging was colored red, possible damaging was colored yellow and benign was colored green. For MutationTaster, 'Disease Causing variants' were colored red and 'polymorphisms' were colored green. In the column showing the predictions using the ACMG guidelines, a Variant of Unknown Significance was colored red and likely benign was colored green. Based on these predictions and functional studies, the *NAE1* genetic variants were considered likely pathogenic.

**Table S2:** Comparison of the phenotype of individuals with Dravet syndrome (MIM: 607208) caused by *SCN1A* mutations to the phenotype of individual 4 from the *NAE1* cohort.

| Phenotypic Feature          | Dravet Syndrome | Individual 4 | Cohort of individuals with <i>NAE1</i> genetic variants |
|-----------------------------|-----------------|--------------|---------------------------------------------------------|
| Short stature               | -0.5 SDS        | -5.0 SDS     | -1, -1.5, -2.3 SDS                                      |
| Microcephaly                | +               | -            | -                                                       |
| <b>Facial abnormalities</b> | -               | +            | +                                                       |
| Wide nasal bridge           | -               | +            | +                                                       |
| Long philtrum               | -               | +            | +                                                       |
| Anteverted nares            | -               | +            | +                                                       |

|                                                         |   |    |   |
|---------------------------------------------------------|---|----|---|
| Large ears                                              | - | +  | + |
| Epicanthal folds                                        | - | +  | + |
| Narrow palpebral fissures                               | - | +  | - |
| Thick lower lip vermilion                               | - | +  | - |
| Broad Philtrum                                          | - | +  | + |
| Lymphopenia                                             | - | +  | + |
| <b>Other</b>                                            |   |    |   |
| Recurrent infections                                    | - | +  | + |
| Ischiopubic hypoplasia                                  | - | +  | + |
| <b>Neurological Abnormalities</b>                       | + | +  | + |
| Seizures                                                | + | +  | + |
| Seizure onset in the first year of life                 | + | NA | + |
| Seizure triggered by fever                              | + | +  | + |
| Psychomotor development stagnates.                      | + | +  | + |
| Mental decline                                          | + | +  | + |
| Behavioral problems                                     | + | -  | - |
| Learning disabilities                                   | + | +  | + |
| Global brain atrophy on MRI                             | + | +  | + |
| EEG with irregular generalized spike and wave complexes | + | NA | - |
| Microcephaly                                            | + | -  | - |
| Ataxia                                                  | + | NA | - |
| Limited knee extension                                  | + | +  | - |
| Muscle Weakness                                         | + | NA | + |
| Dysgenesis of the hippocampus                           | + | +  | + |

**Table S2:** In individual 4, both a heterozygous truncating mutation in the *SCN1A* gene as well as a genetic variant in the *NAE1* gene were identified. To distinguish the clinical phenotype caused by each of the genetic variants, the phenotypic features of Dravet syndrome(6)(MIM: 607208) were compared to all phenotypic features observed in individual 4. Truncating *SCN1A* mutations result mostly in Dravet syndrome. As individual 4 has a truncating mutation in *SCN1A*, features of Dravet syndrome were used for comparison. The characteristic facial features, short stature, lymphopenia, frequent infections and ischiopubic hypoplasia have never been identified in Dravet disease, and therefore suggest an additional role for the genetic variants in the *NAE1* gene in disease pathophysiology.

**Table S3:** List of 24 most specific phenotypes (with the highest occurrence ratio).

| HPO code   | HPO name                                      | Associated genes | Individual1 | Individual2 | Individual3 | Individual4 | Percentage of cohort | Occurrence Ratio |
|------------|-----------------------------------------------|------------------|-------------|-------------|-------------|-------------|----------------------|------------------|
| HP:0008822 | Hypoplastic ischiopubic rami                  | 1                | X           | X           | X           | X           | 100                  | 100              |
| HP:0006834 | Developmental stagnation at onset of seizures | 1                | X           | -           | X           | X           | 75                   | 75               |
| HP:0410256 | Infection associated lymphopenia              | 1                | X           | X           | -           | X           | 75                   | 75               |
| HP:0031397 | Reduced proportion of naive T cells           | 1                | X           | X           | NA          | NA          | 50                   | 50               |
| HP:0030887 | Increased lymphocyte apoptosis                | 1                | X           | X           | NA          | NA          | 50                   | 50               |
| HP:0410255 | Transient lymphopenia                         | 2                | X           | X           | X           | -           | 75                   | 37.5             |
| HP:0030374 | Decreased proportion of memory B cells        | 2                | X           | X           | X           | NA          | 50                   | 25               |

|            |                                         |     |   |   |    |    |     |       |
|------------|-----------------------------------------|-----|---|---|----|----|-----|-------|
| HP:0025539 | Abnormal B cell subset distribution     | 2   | X | X | NA | NA | 50  | 25    |
| HP:0031869 | Recurrent joint dislocation             | 4   | X | X | NA | NA | 50  | 12.5  |
| HP:0007281 | Developmental stagnation                | 12  | X | X | X  | X  | 100 | 8.3   |
| HP:0002265 | Large fleshy ears                       | 11  | X | X | -  | X  |     | 6.81  |
| HP:0003173 | Hypoplastic pubic bone                  | 15  | X | X | X  | X  | 100 | 6.66  |
| HP:0010975 | Abnormal B cell count                   | 9   | X | X | NA | NA | 50  | 5.55  |
| HP:0001041 | Facial erythema                         | 6   | X | - | -  | -  | 25  | 4.16  |
| HP:0045025 | Narrow palpebral fissure                | 39  | X | X | X  | X  | 100 | 2.56  |
| HP:0007874 | Almond-shaped palpebral fissure         | 41  | X | X | X  | X  | 100 | 2.44  |
| HP:0002344 | Progressive neurologic deterioration    | 43  | X | X | X  | X  | 100 | 2.32  |
| HP:0200005 | Abnormal shape of the palpebral fissure | 44  | X | X | X  | X  | 100 | 2.27  |
| HP:0002850 | Decreased circulating total IgM         | 26  | X | X | NA | NA | 50  | 1.92  |
| HP:0009103 | Aplasia/hypoplasia involving the pelvis | 57  | X | X | X  | X  | 100 | 1.754 |
| HP:0025540 | Abnormal T cell subset distribution     | 33  | X | X | NA | NA | 50  | 1.51  |
| HP:0002180 | Neurodegeneration                       | 77  | X | X | X  | X  | 100 | 1.75  |
| HP:0011839 | Abnormal T cell count                   | 46  | X | X | X  | X  | 50  | 1.08  |
| HP:0001888 | Lymphopenia                             | 107 | X | X | NA | NA | 50  | 0.70  |

**Table S3:** Overview of the most specific phenotypes as depicted in Figure 3. The first two rows represent the phenotype and the HPO codes attached to the phenotype name. The third column shows the number of genetic diseases associated with the phenotype, as assessed using the Human Phenotype Ontology.(7) Columns four to seven show which individuals display the phenotype, X means the phenotype is present, - means the phenotype is not present, and NA means the phenotype was not assessed. If the phenotype was not assessed, it was considered 'not present' for the calculation of column 8 (percentage). The occurrence ratio is the value of column 8 divided by the value of column 3.

**Table S4: Overview of primers used for this study.**

| Construct                     | Targeting sequence                                                                       |
|-------------------------------|------------------------------------------------------------------------------------------|
| NAE1 Tet-PkLo-Puro            | 5'-CCGGAGTCCTATGATTTGGATCACTCGAGTGATCCAAATCATAGGACTTTTTTTG54-3'                          |
| pLenti-CMV-Puro NAE1          | 5'-GAATTCTGCAGTCGACATGGCGCAGCTGGGA-3'<br>3'-GCTGTCTAGACTCGAGCTACAACCTGGAAAGTTGCTGAAGT-5' |
| NAE1 sequencing primer        | 5'-GGCTCCAGAAGATGAAGAGAA-3'                                                              |
| Plko-tet-on sequencing Primer | 5'-ATTACGCCAAGGTCGACTTAACCCT-3'                                                          |

**Table S5:** Overview of significantly up- and downregulated genes identified with RNA sequencing.

| Gene     | Adjusted p-value | Z-Score HC1 | Z-Score HC2 | Z-Score HC3 | Z-Score Father | Z-Score Mother | Z-Score Individual1 | Z-score Individual2 | Log2 Fold Change I1 | Log2 Fold Change I2 |
|----------|------------------|-------------|-------------|-------------|----------------|----------------|---------------------|---------------------|---------------------|---------------------|
| ADA2     | 0.03585676       | 2.176       | -0.55       | 0.03        | -0             | -0.364         | -0.65               | -0.637              | -2.639              | -2.542              |
| ADAMTS8  | 0.02301275       | -0.46       | 2.224       | -0.093      | -0.34          | -0.154         | -0.589              | -0.589              | -5.763              | -5.763              |
| ADAMTSL4 | 1.72E-05         | 1.018       | -0.45       | 0.607       | 0.364          | 0.9949         | -1.08               | -1.45               | -1.852              | -3.202              |
| AKAP6    | 0.02207786       | 0.955       | -0.51       | 1.393       | 0.765          | -0.873         | -1.011              | -0.72               | -3.498              | -1.815              |
| AKR1C2   | 0.0456592        | 2.159       | 0.146       | -0.443      | -0.04          | -0.604         | -0.668              | -0.555              | -5.456              | -2.796              |
| AMOT     | 0.01333326       | -0.2        | 1.246       | -0.325      | 0.07           | 1.3758         | -1.247              | -0.922              | -2.028              | -1.354              |
| AMPH     | 0.04072475       | 0.044       | 1.687       | -0.47       | 1.026          | -0.525         | -1.041              | -0.721              | -7.565              | -2.098              |
| ARHGAP45 | 0.00015617       | -0.14       | -0.45       | 0.318       | 1.902          | 0.3394         | -0.985              | -0.985              | -6.492              | -6.492              |
| ATP2A3   | 0.00727996       | 0.551       | -0.43       | 1.644       | 0.781          | -0.693         | -0.94               | -0.917              | -6.185              | -5.004              |
| AXIN2    | 7.88E-05         | 1.456       | -0.01       | -0.693      | 1.262          | -0.127         | -0.995              | -0.895              | -7.993              | -3.713              |
| B4GAT1   | 0.03114516       | 0.877       | 0.481       | 0.665       | -0.57          | 1.0486         | -1.288              | -1.215              | -1.381              | -1.29               |
| BMPER    | 0.00775421       | 0.129       | 1.917       | 0.289       | -0.27          | 0.0078         | -1.041              | -1.035              | -1.391              | -1.38               |
| BOC      | 0.03355107       | 0.17        | 0.501       | 0.028       | -0.14          | 1.7381         | -1.307              | -0.984              | -1.381              | -1.009              |
| BTN3A2   | 0.04321401       | 0.16        | 0.479       | -0.101      | 0.302          | 1.576          | -1.555              | -0.861              | -6.624              | -1.526              |
| C20orf96 | 0.04361249       | 0.783       | 0.161       | 0.858       | 0.225          | 0.7691         | -1.21               | -1.587              | -1.513              | -2.238              |
| CAMK2N1  | 1.10E-07         | 1.311       | 0.661       | 0.231       | -0.04          | 0.4884         | -1.469              | -1.18               | -2.948              | -1.971              |
| CASZ1    | 0.04958066       | 1.869       | 0.138       | -0.167      | 0.326          | -0.029         | -1.253              | -0.885              | -5.171              | -2.054              |
| CD302    | 0.03355107       | 0.402       | 1.123       | -0.255      | 0.533          | 0.728          | -1.763              | -0.768              | -3.48               | -1.032              |
| CD82     | 0.0109587        | -0.48       | 1.155       | 0.757       | 0.38           | 0.716          | -1.309              | -1.222              | -2.01               | -1.815              |
| CDH4     | 0.00292178       | 1.496       | 0.196       | 0.567       | 0.445          | -0.192         | -1.338              | -1.173              | -1.572              | -1.337              |
| CDK18    | 0.0437208        | -0.05       | -0.45       | 2.194       | 0.018          | -0.571         | -0.579              | -0.567              | -7.312              | -5.591              |
| CDON     | 0.03061071       | 0.047       | 0.282       | -0.07       | -0.5           | 2.0023         | -0.66               | -1.106              | -1.368              | -3.08               |
| CELSR1   | 0.04874031       | -0.09       | 1.598       | -0.73       | 0.048          | 1.0595         | -0.966              | -0.92               | -4.376              | -3.628              |
| CHRD     | 0.00138544       | 0.509       | 0.241       | -0.745      | 1.293          | 0.9565         | -1.127              | -1.127              | -5.823              | -5.823              |
| CILP2    | 0.00281157       | 0.251       | 0.181       | 1.61        | -0.45          | 0.6964         | -1.146              | -1.146              | -6.088              | -6.088              |
| CLEC2A   | 0.01419896       | 0.816       | -0.13       | -0.691      | 1.902          | -0.516         | -0.691              | -0.691              | -8.302              | -8.302              |
| CLEC2B   | 0.00013394       | 1.331       | -0.13       | -0.603      | 1.504          | -0.434         | -0.892              | -0.773              | -5.977              | -3.167              |
| CLMN     | 0.01653896       | -0.39       | 0.277       | -0.228      | 2.129          | -0.315         | -0.737              | -0.737              | -3.946              | -3.946              |
| CNNM1    | 0.02807154       | -0.93       | 0.906       | 1.501       | 0.544          | -0.155         | -0.932              | -0.932              | -5.224              | -5.224              |
| COL10A1  | 0.04153762       | 0.238       | -0.02       | -0.071      | 2.058          | -0.493         | -0.854              | -0.854              | -5.363              | -5.363              |
| COL6A3   | 0.00051898       | 0.45        | 1.023       | 0.89        | -0.25          | 0.5322         | -1.087              | -1.559              | -1.179              | -1.843              |
| COL7A1   | 0.01159841       | 1.196       | -0.52       | -0.273      | 0.799          | 1.0304         | -0.99               | -1.244              | -1.426              | -1.939              |
| COL8A2   | 6.74E-05         | 0.3         | 1.03        | 1.232       | 0.39           | -0.592         | -1.032              | -1.329              | -1.895              | -3.007              |
| COX7A1   | 0.00021423       | 1.263       | 0.053       | -0.003      | 1.37           | -0.609         | -1.005              | -1.069              | -2.699              | -3.113              |
| CPXM2    | 1.53E-06         | 1.858       | -0.14       | 0.772       | -0.34          | -0.284         | -0.896              | -0.964              | -3.008              | -3.69               |
| CRYBG1   | 1.25E-05         | 1.415       | 0.673       | -0.477      | 0.157          | 0.6258         | -1.331              | -1.062              | -3.856              | -2.269              |
| CSPG4    | 4.54E-06         | 1.455       | 0.557       | -0.062      | 0.748          | -0.279         | -1.155              | -1.264              | -1.826              | -2.093              |
| CTSK     | 0.00991428       | 1.517       | 0.937       | -0.392      | -0.09          | 0.272          | -1.313              | -0.927              | -1.732              | -1.138              |
| CYB5R2   | 0.00018635       | 0.077       | -0.14       | 0.266       | 2.004          | -0.315         | -0.964              | -0.927              | -3.368              | -3.039              |
| DENND2A  | 1.57E-05         | 0.022       | 1.138       | -0.357      | 1.584          | -0.46          | -0.963              | -0.963              | -7.599              | -7.599              |
| DGCR6    | 0.01241277       | 0.649       | 0.592       | -0.447      | 0.856          | 0.9454         | -1.175              | -1.422              | -2.489              | -4.097              |
| DHCR24   | 0.0036859        | 1.391       | 1.009       | -0.86       | 0.036          | 0.4522         | -0.858              | -1.169              | -1.653              | -2.735              |
| DHRS13   | 0.00074085       | -0.01       | -0.08       | 1.46        | 0.653          | 0.4879         | -1.405              | -1.106              | -4.925              | -2.439              |

|           |            |       |       |        |       |        |        |        |        |        |
|-----------|------------|-------|-------|--------|-------|--------|--------|--------|--------|--------|
| DNM1      | 2.43E-05   | -0.17 | 0.635 | 1.552  | -0.45 | 0.6647 | -1.206 | -1.031 | -3.422 | -2.403 |
| DPF3      | 0.02310761 | -0.36 | 0.612 | 1.61   | -0.6  | 0.7196 | -0.803 | -1.172 | -1.717 | -3.481 |
| DPYSL3    | 0.00052457 | 1.565 | 0.385 | 0.227  | 0.638 | -0.503 | -1.065 | -1.247 | -1.48  | -1.824 |
| ECM1      | 0.00697725 | 1.849 | 0.074 | 0.096  | -0.03 | 0.234  | -0.973 | -1.251 | -1.14  | -1.527 |
| EFNA5     | 0.00839476 | 0.083 | 1.308 | -0.642 | -0.64 | 1.482  | -0.796 | -0.796 | -5.849 | -5.849 |
| EGR2      | 0.0332212  | -0.53 | 0.082 | 2.015  | 0.489 | -0.651 | -0.703 | -0.703 | -5.909 | -5.909 |
| ELOVL2    | 0.01862053 | -0.39 | 1.233 | -0.2   | -0.32 | 1.5545 | -1.012 | -0.861 | -6.66  | -3.089 |
| ENPP1     | 0.00292178 | -0.66 | 1.1   | -0.081 | 1.528 | 0.081  | -1.174 | -0.792 | -4.632 | -1.866 |
| EPHB2     | 0.00697725 | -0.47 | 1.723 | 0.152  | -0.23 | 0.8284 | -1.133 | -0.876 | -2.866 | -1.828 |
| ERMP1     | 0.00338071 | 0.918 | 0.855 | -0.356 | 1.032 | 0.0769 | -1.403 | -1.122 | -1.87  | -1.395 |
| FBLN7     | 1.66E-05   | 0.08  | -0.29 | -0.149 | 0.739 | 1.751  | -1.047 | -1.086 | -2.601 | -2.806 |
| FGF9      | 0.00396068 | -0.8  | 1.879 | -0.116 | 0.656 | 0.0455 | -0.834 | -0.834 | -6.476 | -6.476 |
| FHOD3     | 0.02506544 | 1.644 | -0.43 | 0.432  | 0.827 | -0.529 | -0.785 | -1.16  | -1.301 | -2.215 |
| FMNL1     | 0.04321401 | 0.57  | 0.232 | -0.196 | 1.356 | 0.6152 | -1.434 | -1.144 | -2.831 | -1.898 |
| FST       | 0.01419896 | -0.67 | -0.44 | 0.115  | 1.445 | 1.303  | -0.984 | -0.772 | -2.295 | -1.599 |
| GDF6      | 0.01862053 | 1.94  | 0.668 | -0.122 | -0.34 | -0.442 | -0.94  | -0.761 | -2.429 | -1.739 |
| GJA1      | 0.00164499 | 1.305 | 0.431 | 0.504  | -0.06 | 0.4501 | -1.015 | -1.619 | -1.103 | -1.963 |
| GJD3      | 0.04361249 | 0.547 | -0.21 | 0.473  | -0.16 | 1.6578 | -1.153 | -1.153 | -7.004 | -7.004 |
| GPR153    | 0.01121289 | 0.473 | -0.18 | 0.888  | 0.145 | 1.2314 | -1.548 | -1.012 | -1.995 | -1.165 |
| GPR3      | 0.04432331 | 0.735 | 0.098 | 0.455  | 0.688 | 0.8556 | -1.538 | -1.293 | -6.739 | -3.001 |
| GRIA1     | 4.54E-06   | 2.16  | -0.35 | 0.136  | -0.08 | -0.508 | -0.692 | -0.674 | -7.954 | -5.479 |
| HAS2      | 0.00775421 | 0.18  | 0.626 | -0.43  | 1.703 | 0.0595 | -0.749 | -1.389 | -1.178 | -2.855 |
| HECW1     | 0.0129608  | 0.61  | 0.89  | -0.267 | 1.396 | -0.293 | -1.214 | -1.122 | -4.566 | -3.398 |
| HHIPL1    | 0.00164664 | 1.345 | 0.042 | -0.058 | 0.079 | 1.0455 | -1.428 | -1.024 | -2.485 | -1.509 |
| HLA-B     | 0.04072475 | 0.035 | -0.91 | 1.304  | -0.12 | 1.4044 | -0.757 | -0.952 | -1.609 | -2.261 |
| HR        | 1.81E-06   | 0.705 | -0.51 | 0.843  | 0.402 | 1.0836 | -1.319 | -1.209 | -3.397 | -2.739 |
| ICAM5     | 0.01623189 | -0.42 | -0.47 | 1.543  | -0.24 | 1.2971 | -0.793 | -0.926 | -2.26  | -3.101 |
| IER5      | 0.00238366 | -0.23 | 0.365 | 1.121  | 0.002 | 1.1973 | -1.462 | -0.993 | -2.165 | -1.288 |
| IL15RA    | 0.0246276  | 0.462 | -0.42 | 0.334  | -0.3  | 1.8664 | -1.098 | -0.849 | -3.658 | -2.099 |
| IL18      | 0.03631202 | -0.18 | -0.56 | 0.023  | 2.186 | -0.167 | -0.651 | -0.651 | -6.24  | -6.24  |
| IL1RAP    | 0.03585676 | 1.432 | 0.368 | -0.751 | 0.437 | 0.706  | -1.379 | -0.812 | -2.255 | -1.132 |
| IPMK      | 0.03013895 | 0.584 | 1.489 | 0.38   | -0.19 | 0.2565 | -1.382 | -1.133 | -1.683 | -1.313 |
| IRS2      | 0.01862053 | 0.023 | -0.52 | 0.78   | 0.449 | 1.5347 | -1.144 | -1.118 | -1.359 | -1.323 |
| ISM2      | 0.0202337  | -0.72 | -0.54 | 1.414  | 1.457 | -0.168 | -0.722 | -0.722 | -6.275 | -6.275 |
| KCNB1     | 0.01619268 | 1.485 | 0.518 | 0.644  | 0.337 | -0.925 | -1.14  | -0.918 | -5.846 | -2.663 |
| KCNC3     | 0.00021423 | 1.386 | 0.141 | 1.145  | -0.14 | -0.21  | -1.159 | -1.159 | -6.319 | -6.319 |
| KCNIP3    | 0.01862053 | 1.441 | 0.255 | 1.003  | -0.04 | -0.334 | -1.044 | -1.284 | -1.342 | -1.745 |
| KCNS1     | 6.95E-05   | 0.158 | 0.62  | 0.73   | 1.028 | 0.2673 | -1.402 | -1.402 | -6.918 | -6.918 |
| KIAA1549  | 0.00991428 | 0.719 | 0.825 | 1.36   | 0.051 | -0.831 | -1.014 | -1.11  | -1.945 | -2.252 |
| KIAA1958  | 0.00309789 | 0.78  | 0.89  | 0.519  | 0.451 | 0.1639 | -1.112 | -1.692 | -1.071 | -1.766 |
| KRTAP1-1  | 0.03197017 | 1.818 | 0.275 | 0.597  | -0.32 | -0.356 | -1.073 | -0.939 | -8.311 | -3.408 |
| LAMB1     | 0.01862053 | 0.949 | 1.271 | -0.777 | 0.08  | 0.6727 | -1.167 | -1.03  | -1.278 | -1.113 |
| LAPTM5    | 0.00641507 | -0.13 | -0.45 | -0.418 | 2.159 | 0.1857 | -0.673 | -0.673 | -6.67  | -6.67  |
| LGALS9    | 0.00248602 | -0.4  | 0.746 | 0.434  | 1.649 | -0.29  | -1.071 | -1.071 | -5.793 | -5.793 |
| LIN7A     | 0.04432331 | 2.073 | -0.44 | -0.389 | -0.4  | 0.5102 | -0.559 | -0.788 | -1.895 | -3.897 |
| LINC00707 | 0.00564295 | 0.873 | 1.275 | -0.915 | 0.938 | -0.256 | -0.957 | -0.957 | -6.862 | -6.862 |

|              |            |       |       |        |       |        |        |        |        |        |
|--------------|------------|-------|-------|--------|-------|--------|--------|--------|--------|--------|
| LINC00900    | 0.04958066 | 2     | 0.236 | -0.577 | 0.319 | -0.29  | -0.844 | -0.844 | -5.003 | -5.003 |
| LINC01139    | 0.03374528 | -0.82 | 0.779 | 1.487  | 0.854 | -0.66  | -0.82  | -0.82  | -7.353 | -7.353 |
| LOC101927809 | 0.01513948 | -0.1  | -0.17 | 2.032  | -0.09 | 0.2139 | -0.943 | -0.943 | -8.35  | -8.35  |
| LOXL4        | 1.72E-05   | -0.01 | 1.773 | 0.832  | -0.12 | -0.555 | -0.925 | -0.993 | -2.493 | -2.886 |
| LRIG1        | 0.00543979 | -0.91 | 0.971 | 0.164  | 1.12  | 0.7954 | -1.182 | -0.958 | -2.612 | -1.836 |
| LRP11        | 0.00157294 | 0.043 | 1.164 | -0.263 | 0.679 | 0.9164 | -1.426 | -1.113 | -1.478 | -1.111 |
| LTBP4        | 1.26E-07   | 0.49  | -0.08 | 1.188  | 0.147 | 0.9016 | -1.231 | -1.412 | -2.246 | -2.948 |
| LUM          | 2.90E-05   | 0.085 | 0.692 | 0.879  | 0.72  | 0.4362 | -1.204 | -1.607 | -1.198 | -1.703 |
| MAF          | 0.00011392 | 2.119 | 0.027 | -0.444 | 0.2   | -0.422 | -0.769 | -0.711 | -7.528 | -4.071 |
| MAN1A1       | 0.01862053 | -0.03 | 1.627 | -0.37  | -0.05 | 0.9217 | -1.339 | -0.754 | -2.432 | -1.13  |
| MAOA         | 0.03061071 | 0.342 | 0.27  | -0.721 | 2.01  | -0.458 | -0.721 | -0.721 | -6.003 | -6.003 |
| MARCH9       | 0.00569747 | 1.925 | -0.69 | 0.298  | -0.13 | 0.3667 | -0.953 | -0.819 | -7.408 | -3.208 |
| MATN2        | 0.00056662 | 1.149 | 0.553 | -0.709 | 0.053 | 1.1676 | -0.942 | -1.272 | -1.804 | -3.108 |
| MC4R         | 0.01862053 | 2.244 | -0.23 | -0.446 | -0.12 | -0.46  | -0.493 | -0.493 | -9.408 | -9.408 |
| MDFI         | 0.02506544 | -0.65 | 1.288 | -0.391 | 1.575 | -0.261 | -0.779 | -0.779 | -6.459 | -6.459 |
| MDK          | 0.03252576 | -0.48 | 0.114 | 1.55   | 0.674 | 0.3615 | -0.716 | -1.503 | -1.135 | -3.544 |
| MEIS2        | 0.00991428 | 0.349 | 0.827 | -0.374 | -0    | 1.5044 | -0.896 | -1.41  | -1.048 | -1.798 |
| MFSD10       | 0.02858347 | 1.163 | -0.46 | 0.776  | 0.853 | 0.1537 | -1.213 | -1.268 | -1.054 | -1.106 |
| MGARP        | 0.02722563 | 1.846 | -0.25 | -0.042 | -0.13 | 0.6218 | -1.17  | -0.868 | -8.546 | -2.366 |
| MMP11        | 0.01544699 | -0.35 | -0    | 1.007  | 0.366 | 1.3574 | -1.356 | -1.026 | -6.564 | -2.409 |
| MOCOS        | 3.81E-05   | -0.01 | -0.12 | -0.022 | 2.126 | -0.317 | -0.81  | -0.842 | -3.02  | -3.352 |
| MPP4         | 0.00248602 | 2.104 | 0.216 | -0.557 | 0.1   | -0.446 | -0.709 | -0.709 | -6.468 | -6.468 |
| MSL2         | 0.00874296 | 0.4   | 0.877 | 0.332  | 0.654 | 0.6091 | -1.567 | -1.306 | -1.235 | -1.014 |
| MSTN         | 3.01E-06   | -0.37 | 2.117 | 0.316  | -0.27 | -0.296 | -0.748 | -0.748 | -9.181 | -9.181 |
| MTSS1L       | 0.00961871 | 0.4   | -0.21 | 0.528  | 0.118 | 1.5675 | -0.912 | -1.487 | -1.041 | -1.871 |
| MX1          | 0.00697725 | 1.941 | -0.53 | 0.727  | -0.08 | -0.625 | -0.756 | -0.679 | -6.608 | -3.595 |
| MXRA5        | 7.27E-05   | 0.767 | 1.428 | -0.459 | -0.01 | 0.6027 | -0.964 | -1.367 | -1.851 | -3.772 |
| MYLK         | 0.02506544 | 2.085 | 0.075 | 0.124  | -0.3  | -0.279 | -0.794 | -0.915 | -1.383 | -1.654 |
| MYRIP        | 0.01755076 | 2.242 | -0.2  | -0.241 | -0.23 | -0.518 | -0.526 | -0.526 | -7.39  | -7.39  |
| NA           | 9.99E-06   | -0.23 | -0.27 | 0.585  | 1.639 | 0.5402 | -1.107 | -1.152 | -3.073 | -3.415 |
| NA           | 0.00814197 | 1.089 | -0.13 | 0.909  | -0.44 | 0.958  | -1.147 | -1.242 | -2.03  | -2.318 |
| NA           | 0.01898174 | 0.283 | 0.775 | -0.35  | 0.559 | 1.2674 | -1.451 | -1.083 | -7.581 | -2.379 |
| NA           | 0.04072475 | -0.63 | 0.814 | -0.814 | 0.676 | 1.5804 | -0.814 | -0.814 | -5.782 | -5.782 |
| NES          | 4.24E-10   | -0.34 | 1.538 | -0.27  | 0.874 | 0.4306 | -1.131 | -1.105 | -3.431 | -3.215 |
| NFATC2       | 0.00709268 | 2.09  | -0.12 | -0.538 | 0.381 | -0.369 | -0.777 | -0.667 | -6.689 | -3.165 |
| NFE2L3       | 7.12E-05   | 0.159 | -0.6  | 0.815  | 1.3   | 0.6877 | -1.212 | -1.147 | -3.654 | -3.117 |
| PBX3         | 0.02008894 | 1.62  | 0.751 | -0.547 | 0.356 | -0.076 | -1.341 | -0.763 | -2.646 | -1.199 |
| PCOLCE       | 0.03518198 | -0.13 | 0.027 | 0.989  | -0.21 | 1.5631 | -1.114 | -1.131 | -1.089 | -1.107 |
| PHLDA1       | 0.01862053 | 1.608 | 0.203 | -0.472 | 1.025 | -0.394 | -0.947 | -1.023 | -1.391 | -1.532 |
| PITPNM3      | 0.00684464 | -0.13 | 1.515 | -0.616 | 0.098 | 1.1241 | -1.171 | -0.816 | -2.514 | -1.466 |
| PKN3         | 0.03374528 | 0.149 | -0.17 | 0.01   | 1.738 | 0.5438 | -1.295 | -0.979 | -2.359 | -1.557 |
| PLTP         | 0.04958066 | 1.006 | 1.224 | 0.758  | -0.19 | -0.52  | -1.196 | -1.086 | -1.469 | -1.308 |
| PPP2R2B      | 0.04762812 | 1.971 | 0.008 | -0.134 | 0.484 | -0.585 | -0.872 | -0.872 | -4.657 | -4.657 |
| PRELP        | 0.02301275 | 0.102 | -0.58 | 2.153  | -0.19 | -0.096 | -0.708 | -0.689 | -3.732 | -3.435 |
| PRLR         | 0.01862053 | 0.417 | 1.443 | -0.963 | 1.102 | -0.24  | -0.851 | -0.907 | -3.094 | -3.71  |
| PSG1         | 0.0025378  | 2.022 | 0.604 | -0.233 | -0.48 | -0.485 | -0.678 | -0.756 | -2.843 | -3.842 |

|            |            |       |       |        |       |        |        |        |        |        |
|------------|------------|-------|-------|--------|-------|--------|--------|--------|--------|--------|
| PSG5       | 0.0089704  | 1.78  | 0.517 | -0.756 | -0.18 | 0.4725 | -1.082 | -0.752 | -2.585 | -1.488 |
| RALGPS1    | 0.02881424 | -0.52 | -0.13 | 0.339  | 1.893 | 0.35   | -1.076 | -0.855 | -5.3   | -2.535 |
| RGCC       | 0.01898174 | -0.73 | 0.378 | -0.15  | 2.055 | -0.088 | -0.732 | -0.732 | -8.162 | -8.162 |
| RIMS2      | 0.00540232 | -0.02 | 0.415 | -0.808 | 1.193 | 1.2763 | -1.03  | -1.03  | -4.609 | -4.609 |
| RTN4RL1    | 0.04432331 | 2.139 | -0.21 | 0.006  | 0.073 | -0.536 | -0.755 | -0.722 | -6.275 | -4.509 |
| RUNX2      | 0.00224238 | 1.51  | -0.02 | -0.014 | 0.47  | 0.5453 | -1.029 | -1.463 | -1.625 | -2.918 |
| S1PR3      | 0.00557986 | 0.366 | 0.742 | -0.706 | -0.43 | 1.7607 | -0.989 | -0.745 | -3.69  | -2.023 |
| SALL2      | 0.0129608  | 1.177 | 0.654 | -0.15  | -0.1  | 0.9364 | -1.482 | -1.04  | -6.966 | -2.129 |
| SAMD14     | 0.03197017 | 2.044 | -0.1  | 0.169  | 0.115 | -0.48  | -0.793 | -0.955 | -1.742 | -2.327 |
| SDC4       | 0.02506544 | -0.86 | 0.287 | 1.428  | 0.393 | 0.8342 | -0.794 | -1.284 | -1.188 | -2.242 |
| SERPINE2   | 0.0343186  | 1.949 | 0.348 | -0.373 | 0.368 | -0.675 | -0.659 | -0.958 | -1.372 | -2.326 |
| SFTA1P     | 0.03252576 | -0.5  | -0.41 | -0.418 | 2.037 | 0.6161 | -0.665 | -0.665 | -8.078 | -8.078 |
| SHISAL1    | 0.01120488 | 0.72  | -0.4  | 0.209  | 1.843 | -0.728 | -0.784 | -0.856 | -2.55  | -3.087 |
| SLC29A4    | 0.00697725 | 1.676 | -0.29 | 0.073  | 0.686 | 0.1235 | -1.286 | -0.98  | -6.802 | -2.446 |
| SLC43A1    | 0.00395203 | 0.672 | 0.134 | 1.079  | -0.13 | 0.8821 | -1.536 | -1.102 | -5.661 | -2.147 |
| SLC8A1-AS1 | 0.01121289 | 2.209 | -0.3  | -0.454 | -0.01 | -0.197 | -0.627 | -0.627 | -5.9   | -5.9   |
| SOX9       | 0.03197017 | 1.306 | -0.29 | 0.268  | -0.58 | 1.3202 | -0.936 | -1.087 | -1.764 | -2.219 |
| SPON2      | 7.88E-05   | -0.53 | -0.11 | 0.185  | 2.133 | -0.202 | -0.734 | -0.734 | -7.151 | -7.151 |
| STAP2      | 0.00874296 | 0.5   | 0.842 | -0.115 | 1.295 | 0.0648 | -1.343 | -1.242 | -6.871 | -4.005 |
| STEAP2     | 0.00243819 | 0.01  | 0.809 | 0.943  | 0.064 | 0.8259 | -1.681 | -0.971 | -2.404 | -1.154 |
| STMN3      | 0.0456592  | -0.22 | -0.45 | -0.514 | 2.164 | 0.2361 | -0.532 | -0.676 | -2.086 | -3.425 |
| STX1B      | 0.00382025 | 0.813 | -0.05 | 0.646  | -0    | 1.2161 | -1.363 | -1.258 | -2.409 | -2.097 |
| TCTN2      | 0.02881424 | -0.05 | 0.886 | -0.346 | 0.655 | 1.2486 | -1.548 | -0.841 | -2.859 | -1.189 |
| TGFA       | 0.00091112 | 2.206 | -0.31 | -0.015 | -0.25 | -0.306 | -0.708 | -0.618 | -6.479 | -3.291 |
| TGFBR3L    | 0.03895544 | 1.374 | 0.299 | 1.175  | -0.53 | -0.169 | -1.174 | -0.979 | -3.467 | -2.315 |
| TLE2       | 0.01862053 | 1.331 | 0.846 | 0.514  | -0.43 | 0.163  | -1.427 | -1.002 | -7.287 | -2.138 |
| TMED1      | 0.00874296 | 0.543 | 0.465 | 0.036  | 1.076 | 0.6302 | -1.648 | -1.102 | -1.818 | -1.115 |
| TMEM119    | 0.00074085 | -0.4  | 0.466 | -0.172 | 0.085 | 1.9367 | -0.916 | -0.996 | -1.892 | -2.158 |
| TMEM25     | 0.00052457 | 1.266 | -0.12 | 1.474  | -0.17 | -0.486 | -1.045 | -0.925 | -4.096 | -2.871 |
| TMEM9B-AS1 | 0.04361249 | -0.62 | -0.45 | 0.534  | 1.565 | 0.9017 | -0.966 | -0.966 | -7.031 | -7.031 |
| TNFRSF21   | 0.01648881 | 0.447 | 0.32  | -0.663 | -0.32 | 1.9225 | -0.907 | -0.797 | -2.46  | -1.978 |
| TOR4A      | 0.03751673 | 0.482 | -0.32 | 1.86   | 0.403 | -0.708 | -0.68  | -1.038 | -1.552 | -3.178 |
| TPP1       | 0.00049575 | 1.338 | 0.25  | 0.725  | -0.37 | 0.5667 | -1.306 | -1.208 | -1.601 | -1.45  |
| TRIM14     | 0.0083662  | 1.622 | 0.524 | -0.185 | 0.658 | -0.404 | -1.184 | -1.032 | -1.813 | -1.508 |
| TRIM16     | 0.0056343  | 1.632 | -0.24 | 0.085  | 0.604 | 0.2935 | -1.238 | -1.134 | -1.926 | -1.701 |
| TRIM55     | 1.81E-06   | 1.027 | -0.28 | 1.582  | -0.66 | 0.2603 | -0.968 | -0.964 | -9.965 | -8.029 |
| TRIM7      | 0.00488864 | 0.882 | -0.59 | -0.331 | 1.687 | 0.2711 | -0.986 | -0.935 | -6.013 | -4.26  |
| TSPOAP1    | 0.00992749 | -0.33 | -0.11 | 1.204  | 0.904 | 0.7798 | -1.226 | -1.225 | -2.031 | -2.028 |
| TYRO3      | 0.00082187 | 1.321 | 0.903 | 0.13   | 0.169 | 0.0306 | -1.534 | -1.02  | -3.034 | -1.545 |
| VAT1L      | 0.03627585 | 0.487 | -0.78 | 0.933  | -0.52 | 1.5852 | -0.705 | -1.006 | -1.857 | -3.878 |
| ZNF385D    | 0.02443378 | 1.144 | 0.729 | 1.1    | -0.15 | -0.619 | -1.337 | -0.87  | -3.008 | -1.496 |
| ZNF521     | 0.0202337  | 1.498 | -0.23 | -0.91  | 0.325 | 1.0924 | -0.875 | -0.9   | -2.01  | -2.104 |
| ZNF578     | 0.02998066 | 1.278 | 0.267 | -0.343 | 1.119 | 0.0903 | -1.266 | -1.146 | -5.181 | -3.406 |
| ZNF853     | 0.0021976  | -0.31 | 0.44  | 1.33   | 1.147 | -0.381 | -1.114 | -1.114 | -6.393 | -6.393 |

**Table S4:** Overview of significantly (adjusted p-value <0.05, log2foldchange >2 or <2) up- or downregulated genes identified with RNA sequencing in individuals with *NAE1* genetic variants and healthy control fibroblasts. Heterozygous carriers (parents of individual 1) fibroblasts were also



included. The first column shows the adjusted (Bonferroni) p-value comparing individuals with healthy controls. The 3<sup>th</sup> to the 9<sup>th</sup> column show the Z-scores of all donors comparing the RPKM score of the gene to the RPKM of that gene in all other donors. The 10<sup>th</sup> and 11<sup>th</sup> columns show the log2foldchange in individual 1 and individual 2.

### **Bibliography:**

1. Richards S, Aziz N, Bale S, Bick D, Das S, Gastier-Foster J, et al. Standards and guidelines for the interpretation of sequence variants: A joint consensus recommendation of the American College of Medical Genetics and Genomics and the Association for Molecular Pathology. *Genet Med.* 2015;17(5):405–24.
2. Schwarz JM, Rödelberger C, Schuelke M, Seelow D. MutationTaster evaluates disease-causing potential of sequence alterations. *Nat Methods.* 2010;7(8):575–6.
3. Adzhubei IA, Schmidt S, Peshkin L, Ramensky VE, Gerasimova A, Bork P, et al. A method and server for predicting damaging missense mutations. *Nat Methods.* 2010;7(4):248–9.
4. Rentzsch P, Witten D, Cooper GM, Shendure J, Kircher M. CADD: Predicting the deleteriousness of variants throughout the human genome. *Nucleic Acids Res.* 2019;47(D1):D886–94.
5. Karczewski K.J., Francioli L.C., Tiao G., Cummings B.B., Alföldi J., Wang Q., et al. The mutational constraint spectrum quantified from variation in 141,456 humans. *Nature* 2020; 581:434–443..
6. Ishii A, Watkins JC, Chen D, Hirose S, Hammer MF. Clinical implications of SCN1A missense and truncation variants in a large Japanese cohort with Dravet syndrome. *Epilepsia.* 2017;58(2):282–90.
7. Köhler S, Gargano M, Matentzoglou N, Carmody LC, Lewis-Smith D, Vasilevsky NA, et al. The human phenotype ontology in 2021. *Nucleic Acids Res.* 2021;49(D1):D1207–17.
