# Supplementary material
Source: PubMed Central journal article supplement (PMC9892777)
Supplement: mmc2.pdf [file mmc2.pdf]

# Bi-allelic variants in *NAE1* cause intellectual disability, ischiopubic hypoplasia, stress-mediated lymphopenia and neurodegeneration

## Graphical abstract

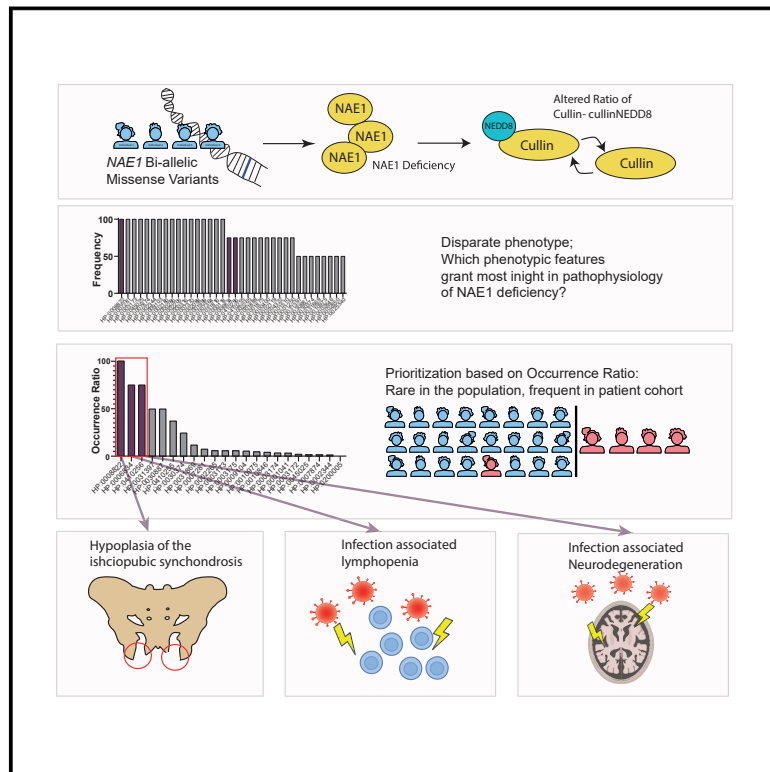

## Authors

Irena J.J. Muffels, Imre F. Schene, Holger Rehmann, ..., Femke van Wijk, Sabine A. Fuchs, Peter M. van Hasselt

## Correspondence

[p.vanhasselt@umcutrecht.nl](mailto:p.vanhasselt@umcutrecht.nl)

**The authors describe four individuals with bi-allelic variants in *NAE1*, which encodes the NEDD8-activating enzyme E1 regulatory subunit and is essential for neddylation. By focusing on the biology underlying the rarest observed clinical features, they unveil the importance of neddylation for skeletal development and for maintaining cellular integrity during stress.**

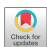

# Bi-allelic variants in *NAE1* cause intellectual disability, ischiopubic hypoplasia, stress-mediated lymphopenia and neurodegeneration

Irena J.J. Muffels,<sup>1,4</sup> Imre F. Schene,<sup>1</sup> Holger Rehmman,<sup>2</sup> Maarten P.G. Massink,<sup>3</sup> Maria M. van der Wal,<sup>4</sup> Corinna Bauder,<sup>5,6</sup> Martha Labeur,<sup>5</sup> Natalia G. Armando,<sup>7</sup> Maarten H. Lequin,<sup>8</sup> Michiel L. Houben,<sup>9</sup> Jaques C. Giltay,<sup>3</sup> Saskia Haitjema,<sup>10</sup> Albert Huisman,<sup>10</sup> Fleur Vansenne,<sup>11</sup> Judith Bluvstein,<sup>12</sup> John Pappas,<sup>13</sup> Lala V. Shailee,<sup>14</sup> Yuri A. Zarate,<sup>15</sup> Michal Mokry,<sup>16</sup> Gijs W. van Haaften,<sup>17</sup> Edward E.S. Nieuwenhuis,<sup>18</sup> Damian Refojo,<sup>7,19,20</sup> Femke van Wijk,<sup>3,20</sup> Sabine A. Fuchs,<sup>1,20</sup> and Peter M. van Hasselt<sup>1,\*</sup>

## Summary

Neddylation has been implicated in various cellular pathways and in the pathophysiology of numerous diseases. We identified four individuals with bi-allelic variants in *NAE1*, which encodes the neddylation E1 enzyme. Pathogenicity was supported by decreased *NAE1* abundance and overlapping clinical and cellular phenotypes. To delineate how cellular consequences of *NAE1* deficiency would lead to the clinical phenotype, we focused primarily on the rarest phenotypic features, based on the assumption that these would best reflect the pathophysiology at stake. Two of the rarest features, neuronal loss and lymphopenia worsening during infections, suggest that *NAE1* is required during cellular stress caused by infections to protect against cell death. In support, we found that stressing the proteasome system with MG132—requiring upregulation of neddylation to restore proteasomal function and proteasomal stress—led to increased cell death in fibroblasts of individuals with *NAE1* genetic variants. Additionally, we found decreased lymphocyte counts after CD3/CD28 stimulation and decreased NF- $\kappa$ B translocation in individuals with *NAE1* variants. The rarest phenotypic feature—delayed closure of the ischiopubic rami—correlated with significant downregulation of *RUN2X* and *SOX9* expression in transcriptomic data of fibroblasts. Both genes are involved in the pathophysiology of ischiopubic hypoplasia. Thus, we show that *NAE1* plays a major role in (skeletal) development and cellular homeostasis during stress. Our approach suggests that a focus on rare phenotypic features is able to provide significant pathophysiological insights in diseases caused by mutations in genes with pleiotropic effects.

## Introduction

Covalent attachment of ubiquitin, NEDD8, and SUMO proteins to target proteins (called ubiquitination, neddylation, and sumoylation, respectively) is an important mechanism for eukaryotic protein regulation.<sup>1</sup> Neddylation involves the attachment of NEDD8 to a protein target through a sequential, three-step process, that is facilitated by so-called E1, E2, and E3 enzymes.<sup>2–4</sup> The E1 complex consists of APPBP1—encoded by *NAE1* (MIM: 603385)—and UBA3.<sup>5–7</sup> While UBA3 acts as the activating enzyme, APPBP1 accelerates the kinetics of this first step.<sup>6</sup> The E2

enzyme aids a consecutive transthiolation reaction of NEDD8. E3 enzymes catalyze the transfer of NEDD8 from the E2 enzyme onto the neddylation target. The best-known targets of neddylation are cullins, that form cullin-RING ligase complexes upon neddylation (CRLs),<sup>8,9</sup> which can tag proteins for degradation via the 26S proteasome. Additionally, non-cullin neddylation targets have been described.<sup>2,10</sup>

Neddylation is thought to be involved in the pathophysiology of many diseases, including Alzheimer disease,<sup>11,12</sup> Parkinson disease,<sup>13</sup> certain auto-immune diseases,<sup>14</sup> malignancies,<sup>15–17</sup> and hepatic fibrosis.<sup>18</sup> This is not surprising,

<sup>1</sup>Department of Metabolic Diseases, Division Pediatrics, Wilhelmina Children's Hospital University Medical Center Utrecht, Utrecht University, 3584 EA Utrecht, the Netherlands; <sup>2</sup>Department of Energy and Biotechnology, Flensburg University of Applied Sciences, Flensburg, Germany; <sup>3</sup>Department of Genetics, Division Pediatrics, Wilhelmina Children's Hospital University Medical Center Utrecht, Utrecht University, Utrecht, the Netherlands; <sup>4</sup>Center for Translational Immunology (CTI), Division Pediatrics, Wilhelmina Children's Hospital University Medical Center Utrecht, Utrecht University, Utrecht, the Netherlands; <sup>5</sup>Department of Neuroendocrinology, Max Planck Institute of Psychiatry, Munich, Germany; <sup>6</sup>Institute of Developmental Genetics, Helmholtz Zentrum München, Munich, Germany; <sup>7</sup>Instituto de Investigación en Biomedicina de Buenos Aires (iBioBA) - CONICET - Partner Institute of the Max Planck Society, Buenos Aires, Argentina; <sup>8</sup>Division Imaging and Oncology University Medical Center Utrecht, Utrecht University, Utrecht, the Netherlands; <sup>9</sup>Department of General Pediatrics, Wilhelmina Children's Hospital, University Medical Center Utrecht, Utrecht University, Utrecht, the Netherlands; <sup>10</sup>Central Diagnostics Laboratory, University Medical Center Utrecht, Utrecht, the Netherlands; <sup>11</sup>Department of Medical Genetics, University Medical Center Groningen, Groningen, the Netherlands; <sup>12</sup>Dravet Center and Comprehensive Epilepsy Center, NYU School of Medicine, New York, NY, USA; <sup>13</sup>NYU Clinical Genetic Services, NYU Grossman School of Medicine, New York, NY, USA; <sup>14</sup>Department of Radiology, NYU Grossman School of Medicine, New York, NY, USA; <sup>15</sup>Section of Genetics and Metabolism, University of Arkansas for Medical Sciences, Little Rock, AR, USA; <sup>16</sup>Laboratory of Experimental Cardiology, Department of Cardiology, University Medical Center Utrecht, University of Utrecht, Utrecht, the Netherlands; <sup>17</sup>Department of Genetics, Division Laboratories, Pharmacy and Biomedical Genetics, University Medical Center Utrecht, Utrecht, the Netherlands; <sup>18</sup>Department of Biomedical and Life Sciences, University College Roosevelt, Middelburg, the Netherlands; <sup>19</sup>Molecular Neurobiology, Max Planck Institute of Psychiatry, Munich, Germany

<sup>20</sup>These authors contributed equally

\*Correspondence: [p.vanhasselt@umcutrecht.nl](mailto:p.vanhasselt@umcutrecht.nl)

<https://doi.org/10.1016/j.ajhg.2022.12.003>

© 2022 American Society of Human Genetics.

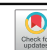

given that neddylation is a key regulator of a wide array of essential intracellular pathways, including NF- $\kappa$ B,<sup>14,19</sup> HIF-1 $\alpha$ ,<sup>20</sup>  $\beta$ -catenin,<sup>21</sup> and XPC.<sup>22,23</sup> Despite neddylation's broad involvement in disease, the exact pathophysiological role of neddylation in these diseases remains elusive, partly due to the large variety of cellular pathways affected by neddylation.

Through GeneMatcher,<sup>24</sup> we identified four individuals harboring *NAE1* genetic variants, that led to decreased *NAE1* abundance and altered neddylation dynamics. Next, we aimed to study the cellular impact, but the large variety of cellular pathways that could be affected by faulty neddylation called for prioritization. Based on the rationale of information theory, which states that the information content of rare events is highest,<sup>25</sup> we studied the underlying cellular mechanisms of phenotypic features that were present in all individuals but rarely present in individuals with other genetic diseases.<sup>26</sup>

The three rarest phenotypic features consisted of ischiopubic synchondrosis hypoplasia, infection-triggered lymphopenia, and infection-triggered neurodegeneration. *In vitro* biochemical analysis of these features helped to delineate the most important functions of *NAE1* for human health: facilitating (skeletal) development and maintaining homeostasis during cellular stress, through a subset of regulatory pathways.

## Material and methods

### Ethics

Individuals 1 and 2 were recruited in the Wilhelmina Children's Hospital Utrecht. Informed consent was obtained to use residual material collected for diagnostic purposes, to include in the Wilhelmina Children's Hospital metabolic biobank (TCBio 19-489/B, <https://tcbio.umcutrecht.nl>). By using the same biobank, we included residual material of pediatric healthy fibroblast lines. Healthy adult donor peripheral blood mononuclear cells (PBMCs) were obtained through the Minidonor Service, an ethics review board-approved blood donation facility at the UMC Utrecht (protocol number 18-774). To compare the clinical phenotype of individuals with *NAE1* variants to a pediatric reference population, clinical data from the Utrecht Patient-Oriented Database (UPOD) was used. UPOD is an infrastructure of relational databases comprising data on affected individuals that visited the University Medical Center Utrecht (UMC Utrecht) since 2004. UPOD data acquisition and management are in accordance with Dutch regulations concerning privacy and ethics. The structure and content of UPOD have been described in more detail elsewhere.<sup>27</sup> Pelvic X-rays were analyzed using the picture archiving and communication system (PACS IDS7 22.1.5). The storage and handling of medical data was recorded in a data management plan which can be consulted via <https://dmponline.dcc.ac.uk/plans/66973>. Individual 3 was recruited via the Dravet Center and Comprehensive Epilepsy Center in New York, and individual 4 was recruited via the University of Arkansas for Medical Sciences. They were recruited through the PhenomeCentral repository. Funding for PhenomeCentral was provided by Genome Canada and Canadian Institute of Health Research (CIHR).<sup>28</sup> From all four individuals, informed consent was obtained for pub-

lication of facial images and medical information. All procedures performed in studies involving human participants are in accordance with national and local institutional review boards (IRBs) of the participating centers.

### Whole-exome sequencing

Exomes were enriched using Agilent SureSelect XT Human All Exon kit V5 and sequenced on a HiSeq sequencing system (Illumina). Reads were aligned to hg19 using a Burrows-Wheeler Aligner. Variants were called using Genome Analysis Toolkit Variant Caller and annotated, filtered, and prioritized using the Bench NGS Lab platform (Agilent-Cartagenia) and/or an in-house designed "variant interface" and manual curation. The minimal coverage of the full target was  $>15 \times 95\%$ . All common polymorphisms with a minor allele frequency (MAF) higher than 0.25 were filtered out using several public databases including 1,000 genomes database,<sup>29</sup> Ensembl GRCh37 genome browser,<sup>30</sup> exome aggregation consortium database (ExAC),<sup>31</sup> genome aggregation database (gnomAD),<sup>32</sup> and database of single nucleotide polymorphisms (dbSNP). Variant calling was performed using the complete human reference genome (hg19, NCBI release GRCh37).<sup>33</sup>

### RNA sequencing

RNA sequencing was performed as previously described.<sup>34</sup> Briefly, total RNA was isolated from fibroblast cultures using Trizol LS reagent (Invitrogen). mRNA was isolated using Poly(A) Beads (NEXTflex). Sequencing libraries were prepared using the Rapid Directional RNA-Seq Kit (NEXTflex) and sequenced on a NextSeq500 (Illumina) to produce 75 base long reads (Utrecht DNA Sequencing Facility). Sequencing reads were mapped against the reference genome (hg19 assembly, NCBI37) using BWA<sup>35</sup> package (mem -t 7 -c 100 -M -R). RPKM values were calculated using the `rna_seq_countgeneread` function from Cisgenome v.2<sup>33</sup> and log2 transformed for further analysis. To perform statistical enrichment in a ranked gene list, the differential gene expression score was calculated: (overall mean RPKM)  $\times$   $\text{abs}(\log_2 \text{FC}) \times -\log_{10}(\text{adjusted } p \text{ value})$ . Subsequent analysis was performed using the Gene Set Enrichment Analysis (GSEA) tool from Broad Institute with the following settings: GSEA pre-ranked, 1000 permutations, GO v.7.1 (updated on: 30-Mar-2021) and KEGG cellular processes.<sup>36</sup>

Statistical overrepresentation in Gene Ontology (GO) terms among differentially expressed downregulated genes ( $\text{Log}_2\text{Fold} < -2$  and adjusted  $p \text{ value} < 0.05$ ) were analyzed using R (v.4.0.3) and R Studio (v.1.3.1093) using the ClusterProfiler package.<sup>37</sup> A list of all expressed genes within control subjects and the affected individuals with a base mean  $>2$  was used as background.

### Plasmid cloning of *NAE1* shRNA and *NAE1* rescue construct

Restriction enzymes (*AgeI*, *EoRi-Hf*, *NheI*, *MluI*) were purchased from New England Biosciences. *NAE1* shRNA was cloned into Tet-pLKO-puro (Addgene). Targeting sequences were obtained using the TRC sequencing database<sup>38</sup> and can be found in Table S4. To generate shRNA-expressing plasmids, the stuffer DNA was removed from pLKO-Tet-On by an *AgeI/EcoRI* digest and replaced with double-stranded oligonucleotides encoding the desired shRNA and *AgeI/EcoRI* sites. This product was transformed to Stellar competent bacteria (Takara Bio). The bacteria were midi prepped according to the manufacturer's protocol (Invitrogen) to obtain plasmid DNA. The sequence was verified by sequencing the entire insert. Lentiviruses were generated by

co-transfecting HEK293 cells with 6  $\mu\text{g}$  of the *NAE1* shRNA-encoding plasmid and lentiviral packaging plasmids pMD2.G (Addgene) and psPAX (Addgene). After three days, lentiviruses were obtained by spinning down the filtered HEK293 medium at  $50,000 \times g$  for 120 min. The pellet contained the lentiviruses. Fibroblasts were transduced by incubation of 8  $\mu\text{g}/\text{mL}$  polybrene with lentivirus containing medium for 24 h. The transduced fibroblasts with build-in construct were selected with Puromycin (Santa Cruz Biotechnology). shRNA expression was induced by addition of 1  $\mu\text{g}/\text{mL}$  doxycycline (Sigma) for 7 days.<sup>39,40</sup>

The WT *NAE1* cDNA of isoform a (GenBank: NM\_003905.4) was cloned from human cDNA using flanking primers that contained complementary 5' and 3' coding sequences and either *Mlu1* or *Nhe1* restriction sites, respectively. The pLenti CMV Puro vector (Addgene) was digested with *Nhe1* and *Mlu1* and then ligated with the insert. Plasmid DNA and lentiviruses were generated similar to the generation of *NAE1* shRNA-containing plasmids.

### Fibroblast viability assays

Fibroblasts were obtained from individual 1, individual 2, both parents of individual 1, and healthy control subjects. Cells were cultured in fibroblast culture medium (HAM F12 with 10% fetal bovine serum, penicillin [100 UI/mL] and streptomycin [100  $\mu\text{g}/\text{mL}$ ]), in a humidified incubator at 37°C and 5%  $\text{CO}_2$ . Medium was changed every 3–4 days. Cells were split at 80% confluency.

For the viability assays, cells were seeded (2,000 cells/well) in a 96-well plate. The following day, normal culture medium was removed, and medium with different stressors—MG132 (Cayman Chemicals) or MLN4924 (Focus Biomolecules)—was added at the indicated concentrations. After 24 h, culture medium was removed and replaced with 1:2,000 HOECHST 33342 (Sigma) and 1:20 propidium iodide (ThermoFisher). Fluorescent images were obtained with the EVOS XL Imaging System (ThermoFisher). The percentage of dead cells was calculated by dividing the number of PI-positive cells by the number of HOECHST-positive cells.

### Western blotting

Western blots of cullin 1, cullin 3, and *NAE1* were performed in the Max Planck Institute. Cell lysates were prepared by adding RIPA lysis buffer (50 mM TrisHCl [pH 8.0], 150 mM NaCl, 1% NP-40, 0.5% sodium deoxycholate, 0.1% SDS) supplemented with protease inhibitors (Sigma), Phosphostop (Roche), 20  $\mu\text{M}$  N-ethylmaleimide (NEM) (Sigma-Aldrich), and 1,10-orthophenanthroline (OPT) (Sigma-Aldrich) to the cells, scraping into a 1.5 mL tube, sonicating, and centrifuging. Protein concentrations were determined by Bradford protein assay (Biorad). Equal amounts of protein (6  $\mu\text{g}$ ) were loaded into each lane of an 8%–15% SDS-PAGE gel, subjected to electrophoresis, and transferred onto a PVDF membrane (Millipore). Binding of secondary horseradish peroxidase-conjugated antibodies was visualized by chemiluminescent substrate (Millipore). Western blotting membranes were probed with *NAE1* (dilution 1:1,000, Novus Biologicals), cullin 1 (dilution 1:1,000, ThermoFisher Scientific), cullin 3 (dilution 1:1,000, Cell Signaling Technology),  $\beta$ -actin (dilution 1:1,000, Cell Signaling Technology). The intensity values were normalized against total protein using stain-free detection gels (Bio Rad). Western blots of *NAE1* in fibroblasts transduced with *NAE1* shRNA or cDNA were performed in the UMC Utrecht, as described previously.<sup>41</sup>  $\beta$ -actin (dilution 1:1,000, Cell Signaling Technology) or HSP90 (dilution 1:1,000, Cell Signaling Technology) were used as a housekeeper for normalization.

### Flow cytometry

PBMCs were isolated from the whole blood fraction using Ficoll (GE Healthcare).  $\text{CD3}^+$  cells were separated from the PBMC fraction using Pan T cell isolation kit (Miltenyi). Cells were stimulated with soluble anti- $\text{CD3}^+$  (Life Technologies, clone OKT3) and anti- $\text{CD28}^+$  (ThermoFisher) at 1  $\mu\text{g}/\text{mL}$  for 1 day. Cells were stained with  $\text{CD3}$  (dilution 1:50, Biolegend),  $\text{CD4}$  (dilution 1:200, eBioscience),  $\text{CD8}$  (dilution 1:25, BD),  $\text{CD45RA}$  (dilution 1:500, Biolegend),  $\text{CD45RO}$  (dilution 1:12.5, Beckman Coulter) for 20 min at 4°C, followed by incubation with Annexin-V and 7-AAD (dilution 1:20, BD Biosciences) for 15 min at room temperature.

For the analysis of double-negative ( $\text{CD3}^+$ ,  $\text{CD4}^-$ ,  $\text{CD8}^-$ ) T cell counts, number of naive T cells, and the MLN4924 assay, PBMCs were cultured in RPMI with 10% heat-inactivated FCS, 1% penicillin/streptomycin, and 1% L-glutamine for 1 day with or without MLN4924, on a plate coated with 0.1  $\mu\text{g}/\text{mL}$  anti- $\text{CD3}$ . Afterward, cells were stained with  $\text{CD3}$ ,  $\text{CD4}$ ,  $\text{CD8}$ ,  $\text{CD45RA}$ ,  $\text{CD45RO}$ , Fixable Viability Dye eFluor 506, fixed with formaldehyde, and permeabilized with methanol. Cells were immediately analyzed using BD LSRFortessa. Flow cytometry analysis was performed using FlowJo (v.10.6.2, Becton, Dickinson and Company; 2019). Gating strategy is shown in Figure S2.

### Imagstream NF- $\kappa\text{B}$ translocation

$\text{CD3}^+$  T cells were stimulated with anti- $\text{CD3}^+$ / $\text{CD28}^+$  at 2  $\mu\text{g}/\text{mL}$  for the indicated time points (0, 15, and 35 min). After stimulation, cells were fixed immediately using 4% paraformaldehyde. Fixed cells were permeabilized with 0.1% Triton X-100 for 10 min and stained with p65 (dilution 1:16,000, Cell Signaling Technology) and DRAQ5 (dilution 1:8,000, Biolegend) antibodies for 20 min at 4°C, followed by incubation with FITC-anti Rabbit (Jackson) for 20 min at 4°C. Data were collected with Amnis Imagstream MkII Imaging Flow Cytometer (Luminex) and data analysis was performed with IDEAS v.6.0 software. Nuclear area was determined using the morphology mask. Cells with a similarity score  $>0$  were considered translocated. Gating strategy can be found in Figure S3.

### Data analysis

Statistical analysis was performed using GraphPad Prism v.6 for Windows (GraphPad Software). Final counts are presented as the mean percentages  $\pm$  SEM; one- or two-way ANOVA were performed for multiple comparisons. As post hoc, uncorrected Fisher's least discriminant analysis was used. To assess normality, Shapiro-Wilk test was used. Unpaired two-tailed Student's *t* tests or Mann-Whitney *U* were used for dual comparisons.  $p < 0.05$  was considered significant: \* $p < 0.05$ , \*\* $p < 0.01$ , \*\*\* $p < 0.001$ , \*\*\*\* $p < 0.0001$ .

### Occurrence ratio

The occurrence ratio was calculated by dividing the percentage of individuals showing a rare trait by the number of associated genes, extracted from the Human Phenotype Ontology database (HPO) at 20-02-2021.<sup>42</sup>

## Results

### Clinical features of individuals with *NAE1* variants

The index proband (individual 1) was born as the second child to healthy non-consanguineous parents. She presented with a ventricular septal defect, coarctation of

the aorta, and failure to thrive. At one year of age, she was admitted to the ICU with a severe viral respiratory tract infection that led to subsequent loss of developmental milestones and profound therapy-resistant epilepsy. Brain MRI before ICU admission was normal, but after the ICU admission it showed brain atrophy, as evidenced by enlarged ventricles and diminished white matter volume. A subsequent viral respiratory infection a year later resulted in a similar loss of milestones. During these and other infections, she exhibited lymphopenia, which normalized upon recovery. Pelvic X-ray taken at age four showed absence of the os pubis ramus inferior and hip dysplasia. Extensive etiological workup did not lead to a diagnosis. Whole-exome sequencing revealed several genetic variants of uncertain significance (Table S1). Of these variants, the *NAE1* variant was considered the most promising candidate, based on conservation, constraint metrics, and predictions: GenBank: NM\_003905.4: c.[147G>C]; [254G>A], p.[Leu49Phe]; [Arg85Gln].

Through GeneMatcher,<sup>24</sup> three additional individuals with similar phenotypic features, harboring homozygous variants in *NAE1*, were identified (Table 1). Additionally, individual 4 has a pathogenic genetic variant in *SCN1A* (MIM: 182389) and displays phenotypic features associated with Dravet syndrome<sup>43</sup> (MIM: 607208) as well as *NAE1* deficiency (Table S2).

All individuals showed similar facial features (Figure 1): broad forehead (individuals 1, 2, 4), downslant palpebral fissures (individuals 1, 2, 3), epicanthus/telecanthus (individuals 1, 3), round face (individuals 1, 3), prominent cheeks (individuals 1, 3, 4), broad nasal tip (individuals 1, 3, 4), pointed chin (individuals 1, 2, 4), and full lower lip (individuals 2, 4).

All individuals developed epilepsy and experienced exacerbation of epilepsy and/or developmental decline during infectious periods. All individuals showed moderate to severe developmental delay. All individuals showed underdeveloped corpus callosum and enlarged lateral ventricles in MRI. During infancy, three out of four individuals showed splenomegaly. All individuals had frequent infections, which were mostly respiratory tract infections, but urinary tract infections (2/4) and skin infections (2/4) were also observed. Three out of four individuals had documented lymphopenia during infections, that normalized during recovery. All individuals showed hypoplastic ischiopubic rami and decreased bone mineral density (assessed using dual energy X-ray absorptiometry [DEXA] scans). Fibroblasts and PBMCs were obtained from two individuals (individuals 1 and 2) for biochemical analyses. A summary of clinical features can be found in Table 1 and the supplemental note.

#### ***NAE1* abundance and the ratio of neddylated to non-neddylated cullin are altered in individuals with *NAE1* variants**

The amino acid positions where the *NAE1* missense variants are located are highly conserved in other species

(Figure S5). All variants cluster together in the three-dimensional structure of the protein, even though they are located at the N- and C-terminal portions of the protein (Figure 1B). Leu49 (individual 1) is part of the hydrophobic core of *NAE1* (Figure 1C). A phenylalanine at this position is sterically not tolerated and is expected to result in (local) perturbation of the fold. This may reduce the ability of *NAE1* to interact with UBA3 and impacts the positioning of Arg15. Arg15 is in close proximity to the UBA3-bound ATP and is required for efficient catalysis. Arg85 is partially surface exposed but the guanidine group is engaged in hydrogen bonds with Asp61 and Asp69. Substitution of Arg85 by glutamine (individual 1 and 2) disturbs this network of hydrogen bonds, which would destabilize the local fold, which may extend to the interaction surface with UBA3 in proximity to Asp69 (Figure 1D). Cys294 (individual 4) points into the hydrophobic core (Figure 1E). A substitution by a sterically very demanding tryptophan is incompatible with the local fold and would result in destabilization of the entire protein.

The side chain of Arg430 (individual 3) points inwards, and a substitution by a glutamine might thus destabilize the local fold (Figure 1F).

Western blot analysis of fibroblasts from individuals 1 and 2 with *NAE1* genetic variants showed a reduction of *NAE1* by almost 80% compared to healthy control subjects (Figures 2A, S4E, and S4F), whereas heterozygous carriers of *NAE1* variants (parents of individual 1) exhibited a reduction of approximately 50% of *NAE1* abundance (Figure 2A).

Next, we quantified both neddylated (cullin<sup>NEDD8</sup>) and non-neddylated cullin 1 and cullin 3 (Figure 2B). Even though the amount of neddylated cullins was normal, the ratio of neddylated to non-neddylated cullin 1 was significantly decreased in individual 1 and showed a trend toward a decreased ratio in individual 2 (Figures 2A, S4E, and S4F). The ratio of cullin 3 similarly showed a trend toward a decreased ratio in both individuals (Figures 2A, S4E, and S4F). *CUL1* and *CUL3* mRNA levels were unchanged, indicating that the altered ratio does not result from transcriptional upregulation (Figures S4C and S4D). These results indicate that *NAE1* deficiency appears to alter the neddylated to non-neddylated cullin ratio.

To determine the effects of the altered neddylated to non-neddylated cullin ratio on proteasome function, we studied the transcriptomic profile of dermal fibroblast lines of individuals with *NAE1* variants and healthy pediatric dermal fibroblast lines (Figure S1, Table S5). Four out of ten most significantly upregulated enriched pathways (highest false discovery rate) found with gene set enrichment analysis included pathways involved in protein degradation. This is probably the result of proteasome dysfunction, causing compensatory upregulation of alternative cellular protein degradation pathways (Figure 2C). Functionally, this was evidenced by increased sensitivity to proteasome inhibitor MG132 (Figures 2D and S7). Addition of a wild-type *NAE1* cDNA expressing plasmid to cells from individuals with *NAE1* variants decreased MG132 sensitivity (Figures 2E

**Table 1. Overview of symptoms of individuals with *NAE1* variants**

| <b><i>NAE1</i> variant</b>          | <b>Individual 1<br/>c.[147G&gt;C];<br/>[254G&gt;A]p.<br/>[Leu49Phe];<br/>[Arg85Gln]</b> | <b>Individual 2c.<br/>[254G&gt;A];<br/>[254G&gt;A]p.<br/>[Arg85Gln];<br/>[Arg85Gln]</b> | <b>Individual 3<br/>c.[1289 G&gt;A];<br/>[1289G&gt;A]<br/>p.[Arg430Gln];<br/>[Arg430Gln]</b> | <b>Individual 4<br/>c.[882C&gt;G];<br/>[882C&gt;G]p.<br/>[Cys294Trp];<br/>[Cys294Trp]</b> |
|-------------------------------------|-----------------------------------------------------------------------------------------|-----------------------------------------------------------------------------------------|----------------------------------------------------------------------------------------------|-------------------------------------------------------------------------------------------|
| Other variants identified with WES  | full list in <a href="#">Table S1</a>                                                   | no                                                                                      | no                                                                                           | SCN1A:c.[1624C>T]; [=], p.[Arg542*]; [=],                                                 |
| Current age (years)                 | 12                                                                                      | 19                                                                                      | 4                                                                                            | 9                                                                                         |
| Gender                              | F                                                                                       | M                                                                                       | M                                                                                            | F                                                                                         |
| Pregnancy term (weeks)              | 40                                                                                      | 36                                                                                      | 37                                                                                           | 40                                                                                        |
| Birth weight (g)                    | 2,615 (−1.8 SDS)                                                                        | 2,767 (0.05 SDS)                                                                        | 2,140 (−1.6 SDS)                                                                             | 2,300 (−2.48 SDS)                                                                         |
| Head circumference (cm)             | 51 (−0.47 SDS) (8 y)                                                                    | 54 (−0.59 SDS) (13 y)                                                                   | 47.3 (−1.5 SDS) (2 y 5 m)                                                                    | 48.7 (−1.73 SDS) (6 y 6 m)                                                                |
| Height (cm)                         | 116 (−2.53 SDS) (8 y)                                                                   | 150 (−1.5 SDS) (13 y)                                                                   | 91 (−1 SDS) (2 y 5 m)                                                                        | 97 (−5.9 SDS) (7 y)                                                                       |
| Cleft palate                        | −                                                                                       | +                                                                                       | −                                                                                            | −                                                                                         |
| Asymmetrical palate                 | +                                                                                       | +                                                                                       | −                                                                                            | N/A                                                                                       |
| Heart defects                       | + ventricular septal defect and coarctation of the aorta                                | −                                                                                       | −                                                                                            | −                                                                                         |
| Developmental delay                 | severe                                                                                  | moderate                                                                                | moderate                                                                                     | severe                                                                                    |
| Seizures                            | +                                                                                       | −                                                                                       | +                                                                                            | +                                                                                         |
| Hypotonia during infancy            | +                                                                                       | −                                                                                       | +                                                                                            | +                                                                                         |
| Underdeveloped corpus callosum      | +                                                                                       | +                                                                                       | +                                                                                            | +                                                                                         |
| Decreased myelination               | +                                                                                       | +                                                                                       | +                                                                                            | +                                                                                         |
| Enlarged ventricles                 | +                                                                                       | −                                                                                       | +                                                                                            | +                                                                                         |
| Loss of milestones after infections | +                                                                                       | +                                                                                       | +                                                                                            | +                                                                                         |
| Neurodegeneration                   | +                                                                                       | +                                                                                       | +                                                                                            | +                                                                                         |
| Decreased bone density (DEXA scan)  | +                                                                                       | +                                                                                       | +                                                                                            | +                                                                                         |
| Joint dislocation                   | +                                                                                       | +                                                                                       | −                                                                                            | −                                                                                         |
| Joint hyperextensibility            | +                                                                                       | +                                                                                       | −                                                                                            | +                                                                                         |
| Joint stiffness                     | −                                                                                       | −                                                                                       | −                                                                                            | +                                                                                         |
| Resistant to sunburns               | +                                                                                       | +                                                                                       | +                                                                                            | −                                                                                         |
| Recurrent infections                | + respiratory, urinary tract, skin                                                      | + respiratory, skin                                                                     | + respiratory                                                                                | + respiratory, urinary tract                                                              |
| Hepatomegaly at infancy             | +                                                                                       | −                                                                                       | +                                                                                            | −                                                                                         |
| Splenomegaly at infancy             | +                                                                                       | +                                                                                       | +                                                                                            | −                                                                                         |
| Decreased amount of immunoglobulins | + IgG                                                                                   | + IgG, IgM                                                                              | −                                                                                            | −                                                                                         |
| Leukopenia                          | +                                                                                       | +                                                                                       | −                                                                                            | +                                                                                         |
| Periodic lymphopenia                | +                                                                                       | +                                                                                       | −                                                                                            | +                                                                                         |
| AST/ALT increase                    | + during infections                                                                     | −                                                                                       | −                                                                                            | −                                                                                         |
| Delayed closure of ischiopubic rami | +                                                                                       | +                                                                                       | N/A                                                                                          | N/A                                                                                       |
| Increased size of ischiopubic rami  | +                                                                                       | +                                                                                       | +                                                                                            | +                                                                                         |

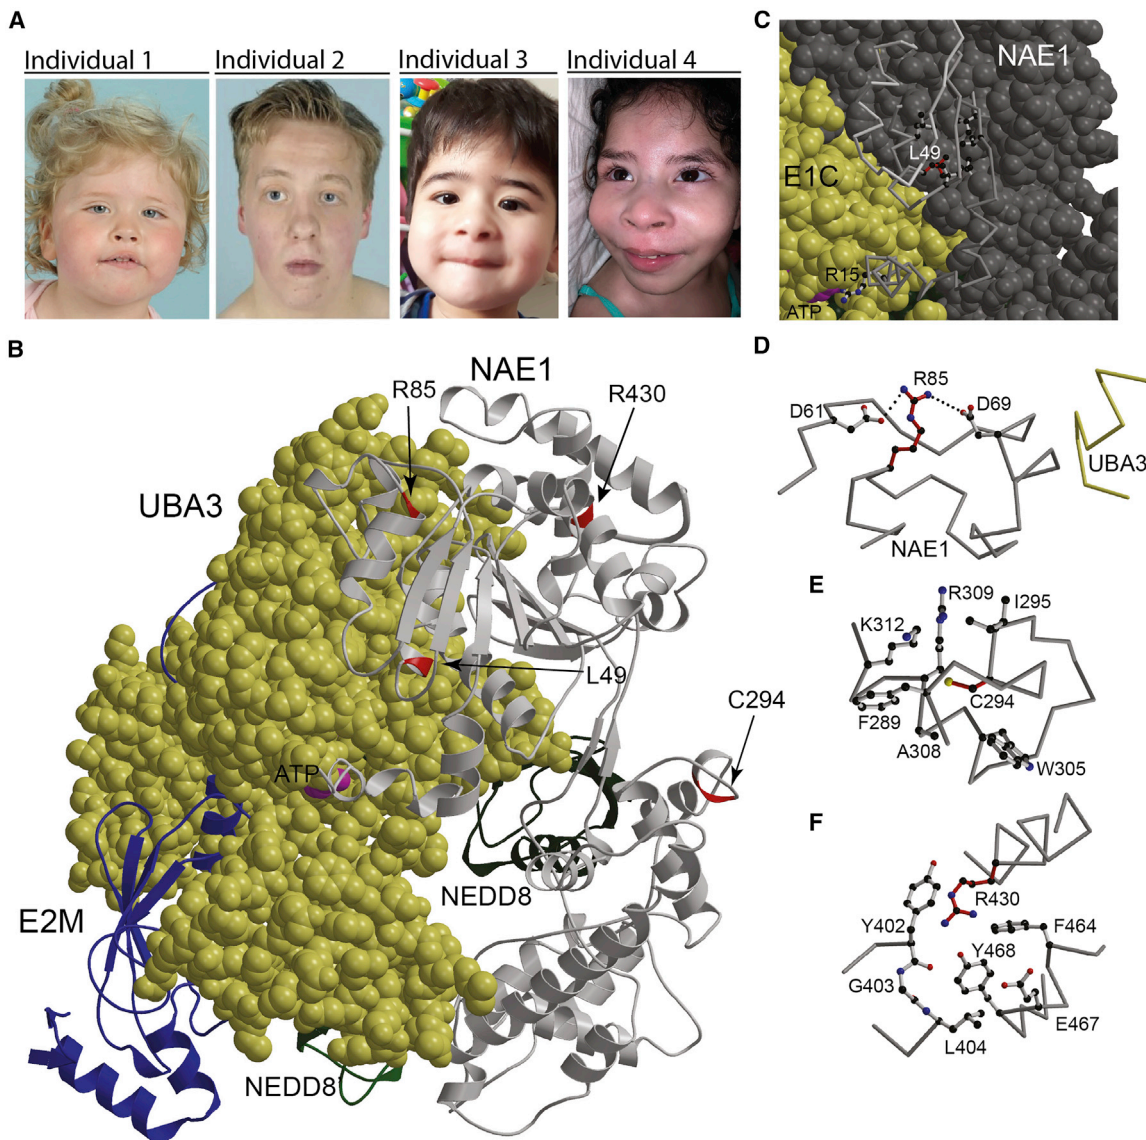

**Figure 1. Facial features of the cohort and structural analysis of *NAE1* variants**

(A) Representative photographs illustrating facial features of individuals with *NAE1* variants.

(B) Graphical representation of UBA3 (space filling, yellow) in complex with *NAE1* (light gray), the E2 of neddylation (EM2, blue), and two molecules of NEDD8 (light and dark green). The positions of Leu49, Arg85, Arg430, and Cys294 are marked in red. ATP is space filling in magenta. The color coding is used throughout the entire figure.

(C) The local environment of Leu49. *NAE1* is represented in part as space filling and in part as backbone trace.

(D–F). Local environments of Arg85, Arg430, and Cys294. Dotted lines indicate hydrogen bonds. Figures were generated by use of programs Molscript and Raster3D.<sup>44,45</sup>

and S4B), while addition of *NAE1*-shRNA to cells from heterozygous carriers mimicked the phenotype of individuals with *NAE1* variants (Figures 2F and S4A). These results suggest that proteasome function might be affected as a result of decreased *NAE1* abundance.

#### Characterization of rare phenotypic features in individuals with *NAE1* variants

After determining the pathogenicity of *NAE1* variants, we studied the cellular and clinical consequences of *NAE1* deficiency. To specify our search, we delineated the rarest phenotypic features by calculating the occurrence ratio

of all phenotypic traits. The occurrence ratio takes both the prevalence within the cohort and the rareness of a feature within the population into account.<sup>26</sup> This approach identified the three rarest phenotypic features, shared by at least 75% of the cohort: hypoplastic ischiopubic rami, infection-associated lymphopenia, and neurodevelopmental setback during infections (Figure 3, Table S3).

#### Individuals with *NAE1* variants show hypoplasia of the os pubis ramus inferior

In individual 1, we observed increased size of the ischiopubic synchondrosis (Figure 4A), which prompted us to study

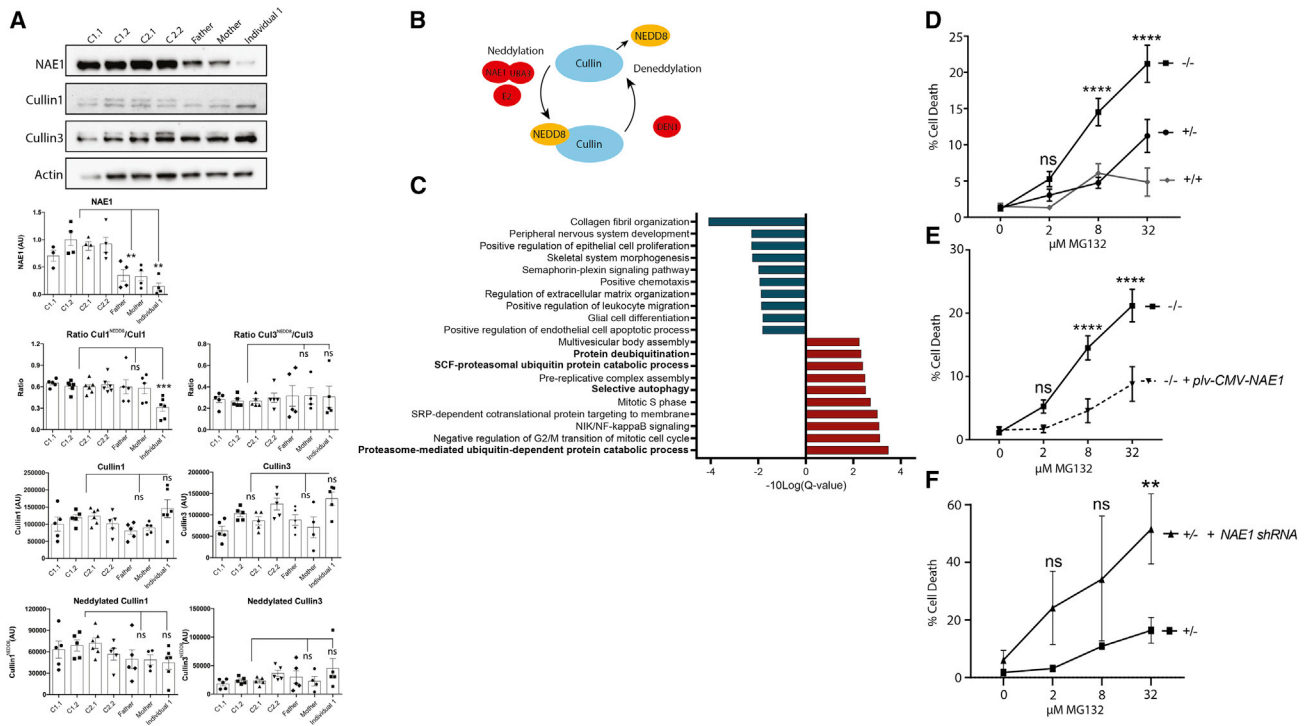

**Figure 2. NAE1 abundance and neddylation to non-neddylation cullin ratio are reduced in individuals with NAE1 variants**

(A) Western blots showing NAE1, neddylation, and non-neddylation cullin 1/cullin 3 abundance in dermal fibroblasts of healthy control subjects (2 healthy controls [C1 and C2]; 2 biological replicates per healthy control [C1.1, C1.2, C2.1, C2.2]; 6 technical replicates each), heterozygous carriers (father and mother of individual 1; 5 technical replicates each), and the fibroblasts of individual 1 with bi-allelic *NAE1* genetic variants (6 technical replicates). Bar graphs represent the average band intensity of all technical replicates per donor  $\pm$  SEM. All band intensities were normalized to total protein content. Quantification was performed using ImageJ. One way ANOVA, Post-hoc: Dunnett's multiple comparisons test (\*\* $p < 0.01$ , \*\*\* $p < 0.001$ ).

(B) Graphic showing the neddylation and deneylation cycles of cullins.

(C) Gene set enrichment analysis of the pre-ranked (based on differential expression score) transcriptomic dataset of individual 1- and 2-derived fibroblasts compared to 3 healthy control fibroblast lines. For this analysis, all genes were taken into account. The top 10 most significantly enriched (based on FDR (Q-value); blue, downregulated; red, upregulated) pathways are shown. Pathways in bold are associated with protein degradation and proteasome function. Pathways were aligned to the GO Ontology database (<https://doi.org/10.5281/zenodo.4495804>, released 2021-02-01).

(D) Cell death in fibroblasts derived from individuals 1 and 2, parents of individual 1, and healthy control subjects, after treatment with MG132 for 24 h at the indicated concentrations (in  $\mu$ M). Cell death was assessed by dividing the amount of PI-positive cells by the total amount of cells. Error bars represent SEM of 3 technical replicates of 2 donors for each group. two-way ANOVA. Post-hoc: Fisher's least significance difference test (LSD) (\*\*\*\* $p < 0.0001$ ).

(E) Cell death in fibroblasts derived from individuals 1 and 2 (*NAE1*<sup>-/-</sup>) with and without a vector expressing WT *NAE1* after treatment with MG132 for 24 h at the indicated concentrations (in  $\mu$ M). Cell death was assessed by dividing the amount of PI-positive cells by the total amount of cells. Error bars represent SEM of 3 technical replicates of 2 donors for each group. Two-way ANOVA. Post-hoc: Fisher's LSD (\*\*\*\* $p < 0.0001$ ).

(F) Cell death in fibroblasts derived from parents of individual 1 (*NAE1*<sup>+/-</sup>) with and without addition of *NAE1* shRNA after treatment with MG132 for 24 h at the indicated concentrations (in  $\mu$ M). Cell death was assessed by dividing the amount of PI-positive cells by the total amount of cells. Error bars represent SEM of 3 technical replicates of 2 donors for each group. Two-way ANOVA. Post-hoc: Fisher's LSD (\*\* $p < 0.01$ ).

the pelvic X-rays of the rest of the cohort. For comparison, we determined the size of the ischiopubic synchondrosis at different ages using pelvic X-rays of a pediatric reference population (Figures 4A and 4B). All individuals with *NAE1* variants showed increased size of the ischiopubic synchondrosis compared to the reference population. In transcriptomic data, Gene Ontologies (Biological Function) aligned to significantly downregulated genes (>2-fold, adjusted p value < 0.05) in fibroblasts of individuals with *NAE1* variants compared to healthy control fibroblasts and were enriched for cartilage development, ossification,

and chondrocyte differentiation (Figure 4C). Two of the main drivers for these pathways included *SOX9* (MIM: 608160) (log2fold change -2, adjusted p value = 0.03) and *RUNX2* (MIM: 600211) (log2fold change -2.3, adjusted p value = 0.002) (Figure 4D). Both *SOX9* and *RUNX2* are associated with congenital skeletal disorders (campomelic and cleidocranial dysplasia [MIM: 114290 and MIM:119600]) that result in hypoplastic ischiopubic rami.<sup>46-48</sup> Thus, *NAE1* might influence expression of these genes, resulting in altered endochondral bone development.



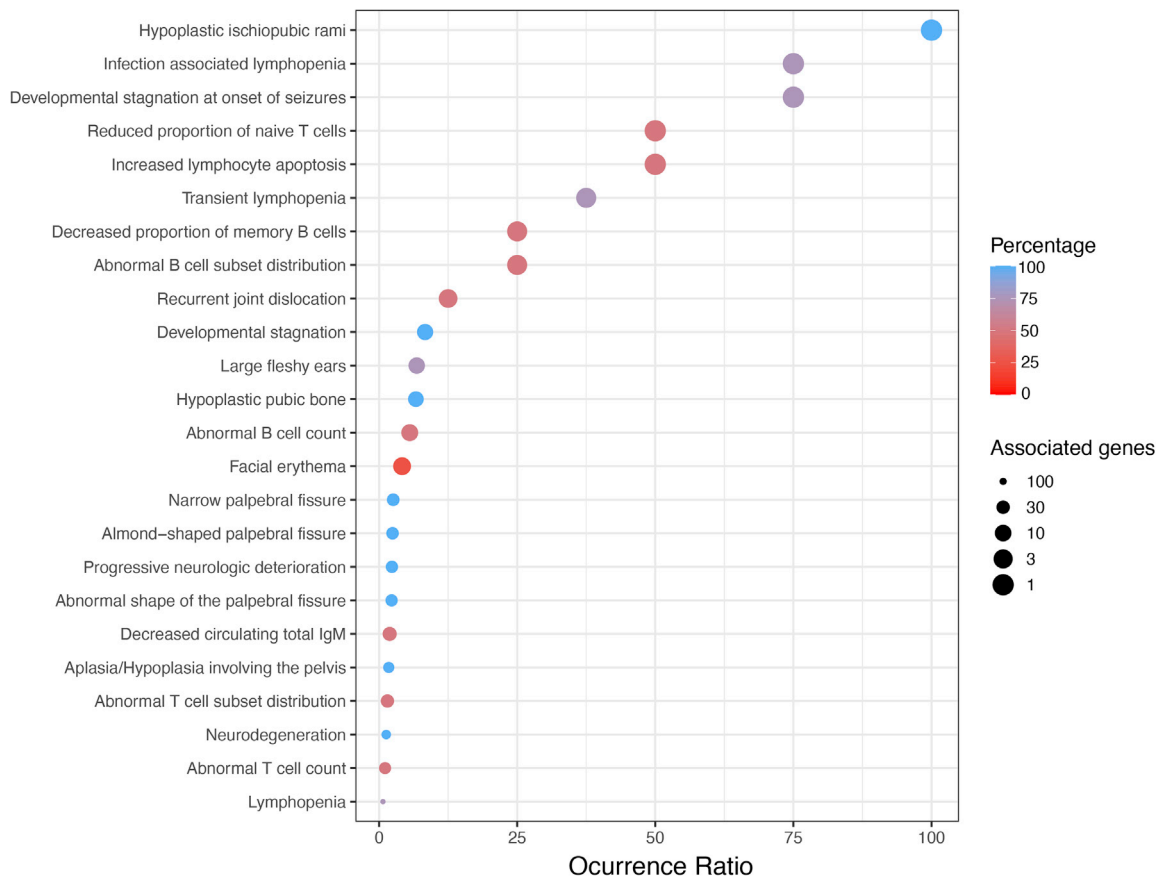

**Figure 3. Rarest clinical features in individuals with *NAE1* variants**

Dot plot showing features with occurrence ratio  $>0.5$  in individuals with *NAE1* variants. Color coding refers to the percentage of individuals in our cohort experiencing a specific symptom. Dot size refers to the number of associated genes in HPO, transformed with  $-10\log$  to give features with the lowest amount of associated genes the largest dot size. The occurrence ratio was calculated by dividing the percentage of individuals experiencing a specific symptom by the number of associated genes.

### Individuals with *NAE1* variants experience lymphopenia and decreased NF- $\kappa$ B translocation during infections

The second rarest phenotypic feature was the lymphopenia, which worsened during infections (Figure 5A). This clinical observation could be mimicked *in vitro*, where we found that individuals with *NAE1* variants showed a trend toward decreased CD3<sup>+</sup> T cell counts without stimulation, which became significant during stimulation with CD3/CD28 for 24 h (Figure 5B). We found the lymphopenia was not the result of a proliferation defect, as the proliferation rates of T cells in healthy control subjects and affected individuals were similar (Figure S6).

Neddylation is an important regulator of NF- $\kappa$ B,<sup>19,49</sup> a signaling molecule known to promote lymphocyte survival.<sup>50</sup> Therefore, we studied NF- $\kappa$ B activation by measuring p65 nuclear translocation in CD3<sup>+</sup> T cells upon stimulation with anti-CD3/CD28. Indeed, p65 nuclear translocation in response to CD3/CD28 stimulation was reduced in individuals with *NAE1* variants (Figure 5C).

Another rare feature involved the significantly decreased percentages of naive (CD45RA-positive) CD4<sup>+</sup> cells in steady-state conditions (Figures 5D and 5E). Additionally, when performing the gating of CD4 and CD8 subpopula-

tions within CD3, we noticed increased percentages (40%) of double-negative (CD4<sup>-</sup>CD8<sup>-</sup>) CD3<sup>+</sup> cells (Figure 5F). Double-negative T cells are immature thymic T cells which are normally found in low ( $<10\%$ ) percentages in peripheral blood, and their physiological role remains poorly understood.<sup>51</sup> Gene set enrichment analysis using the KEGG database showed several pathways that could potentially link neddylation dysfunction to the observed immunologic phenotype, including downregulated WNT/ $\beta$ -catenin and MAP-kinase signaling (Figure S1).

Together, these findings indicate that lymphocytes of individuals with *NAE1* variants have different immunological characteristics at baseline, indicated by their decreased naive T cell percentages and increased double-negative cell counts. Additionally, their defective neddylation leads to perturbed NF- $\kappa$ B signaling during infections, which might limit NF- $\kappa$ B-mediated lymphocyte survival, causing lymphopenia.

### Individuals with *NAE1* variants experience neurodegeneration and increased seizure frequency during infections

All individuals with *NAE1* variants showed brain loss and setbacks in development, mostly related to major hospital

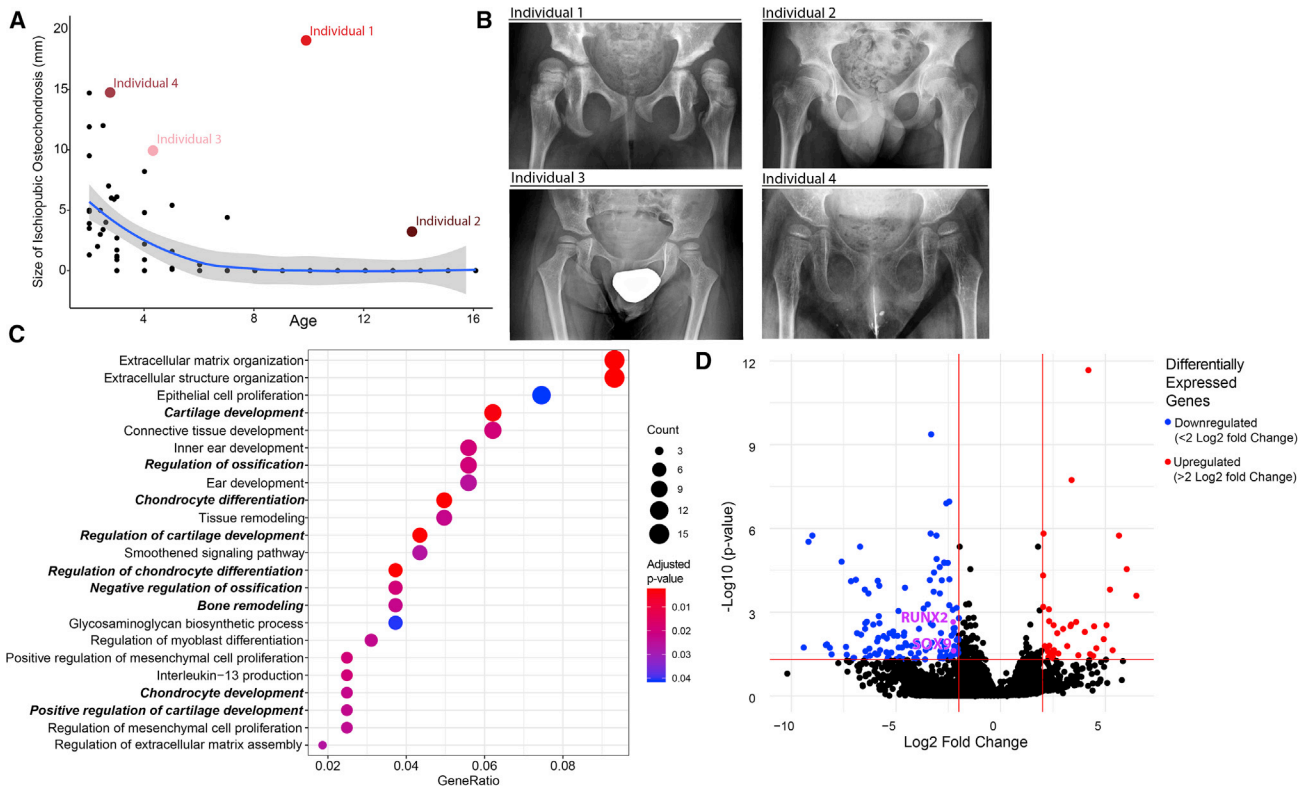

**Figure 4. Individuals with *NAE1* variants show hypoplasia of the ischiopubic synchondrosis**

(A) Size of the ischiopubic synchondrosis was measured in  $n = 200$  pediatric individuals that had pelvic X-rays taken (black dots). The blue line represents the mean size of the ischiopubic synchondrosis in this population with a 95% confidence interval depicted in gray. Red/pink colored dots are the values of the individuals with *NAE1* variants.

(B) Pelvic X-rays of individuals with *NAE1* variants showing increased size of the ischiopubic synchondrosis.

(C) Graph showing the 23 most overrepresented pathways in fibroblasts of individuals with *NAE1* variants using significantly downregulated genes (adjusted  $p$  value  $< 0.05$ ,  $\log_2$ foldchange  $> 2$  and  $< 2$ , Table S5) as input. Five out of nine pathways (bold) that are significantly enriched are involved in endochondral bone development and might explain delayed closure of ischiopubic synchondrosis in individuals with *NAE1* variants. The X axis shows the GeneRatio, defined as the number of genes associated with the pathway divided by the total number of selected genes.

(D) Volcano plot showing differentially expressed genes in individual 1 and 2 fibroblasts versus three healthy age-matched control subjects. *RUNX2* and *SOX9* (in purple) are involved in bone development and are linked to disease presenting with os pubis ramus inferior hypoplasia and are both downregulated in individuals with *NAE1* variants.

admissions due to severe viral respiratory tract infections (Figures 6A and 6B). Similarly, seizure frequency worsened after these severe infections. Neddylated is upregulated during several types of cellular stress, including DNA damage,<sup>52,53</sup> hypoxia,<sup>54</sup> and proteotoxic stress.<sup>55</sup> Therefore, we hypothesized that neddylated is sufficient in homeostatic conditions in individuals with *NAE1* variants, but insufficient in conditions that require upregulated neddylated such as physical stress caused by infections, and attempted to test this hypothesis in fibroblasts. It proved difficult to mimic infectious conditions in fibroblasts, and therefore we tried to downregulate the neddylated system instead, to a level where it would already be impaired in homeostatic conditions. We did so by using the neddylated inhibitor MLN4924. We found that *NAE1* deficiency leads to increased sensitivity to MLN4924-mediated cell death in fibroblasts. In PBMCs, we found that while MLN4924 caused decreased cell counts in all donors, this resulted in significantly lower cell count only in individuals with *NAE1* genetic variants (Figures 6C and 6D). The increased MLN4924 sensitivity sug-

gests that individuals with *NAE1* variants cannot adequately upregulate their neddylated.

## Discussion

In this work we describe four unrelated individuals with intellectual disability harboring bi-allelic variants in *NAE1*. Reduced *NAE1* abundance and decreased ratios of neddylated to non-neddylated cullins in fibroblasts supported pathogenicity. Subsequent phenotypic specificity analysis revealed ischiopubic synchondrosis hypoplasia, infection-triggered lymphopenia, and infection-triggered neurodegeneration as the rarest phenotypic features. We found several pathways involved in endochondral bone remodeling that showed altered expression and downregulated *RUNX2* and *SOX9* expression. Moreover, we found enhanced cell death in fibroblasts after stressing the system with MG132 and MLN4924. In contrast to healthy controls subject, CD3/CD28 signaling led to decreased

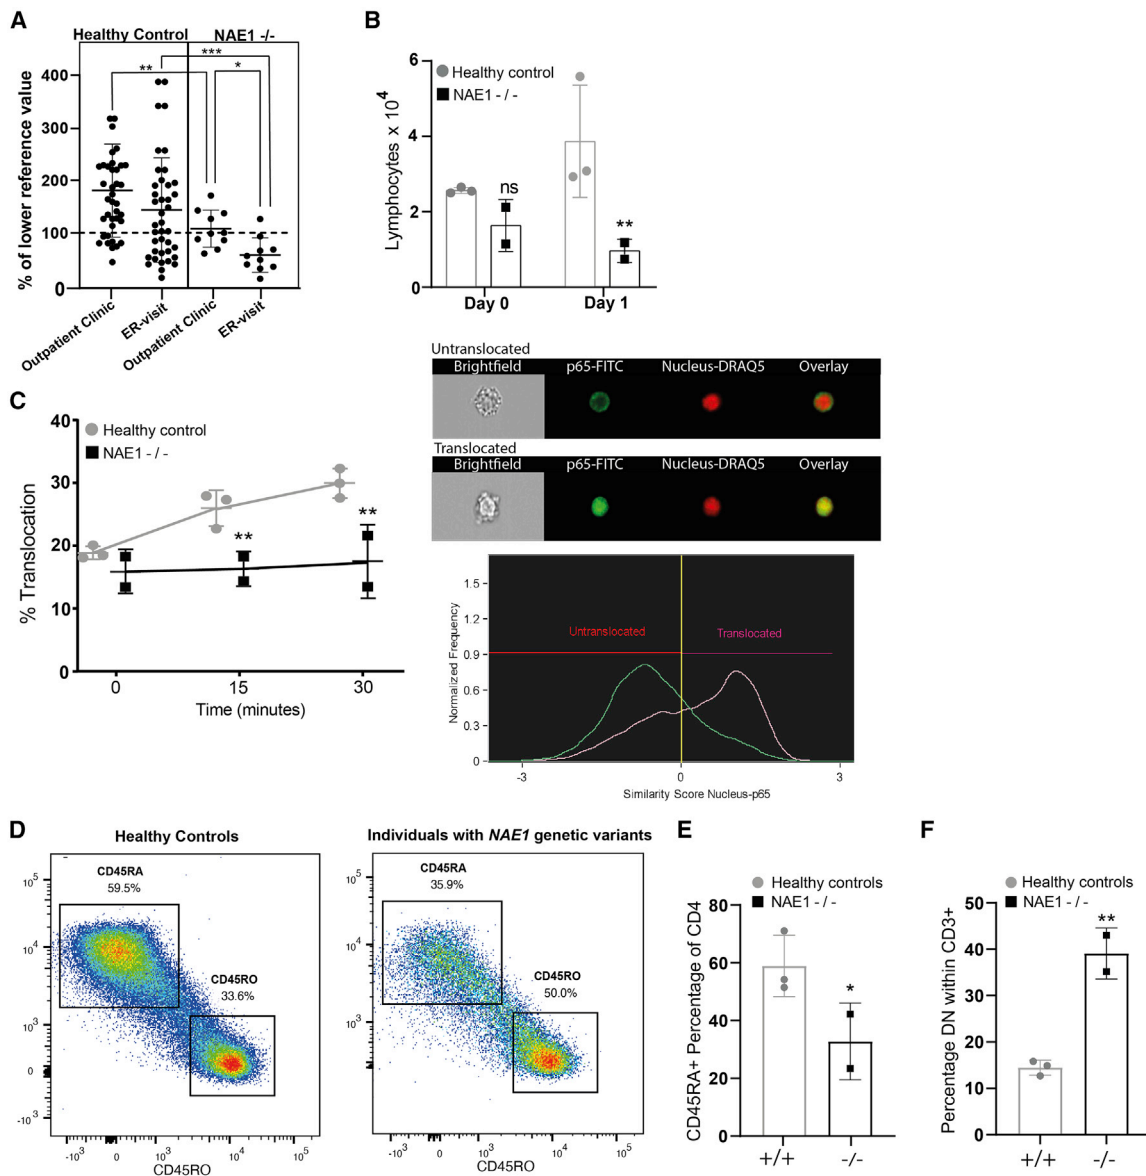

**Figure 5. Individuals with *NAE1* variants experience lymphopenia during inflammation**

(A) Lymphocyte counts (combined B cell and T cell counts) during outpatient clinic visits and during infections for which individuals visited the emergency room (ER visits). All counts were normalized to the lower reference value of the corresponding age and depicted as a percentage. Individual data points of individuals (dots) are shown, line and error bars reflect the mean  $\pm$  SD, two-way ANOVA. Post Hoc: uncorrected Fisher's LSD (\* $p < 0.05$ , \*\* $p < 0.01$ , \*\*\* $p < 0.001$ ).

(B) Flow cytometry analysis of absolute CD3<sup>+</sup> counts after treatment for 1 day with 1  $\mu$ g/ml anti-CD3/CD28 of individuals with *NAE1* variants (-/-) (2 donors, 1 technical replicate) versus healthy controls (3 donors, 1 technical replicate). Bars represent mean value  $\pm$  SD two-way ANOVA, Fisher's LSD (\*\* $p < 0.01$ ).

(C) Percentage of NF- $\kappa$ B (p65) nuclear translocation in individuals with *NAE1* variants (2 donors, 1 technical replicate) and healthy controls (3 donors, 1 technical replicate) CD3<sup>+</sup> cells after stimulation with 2  $\mu$ g/ml anti-CD3/CD28 for different timepoints (minutes) measured with Imagestream. Lines represent mean  $\pm$  SD two-way ANOVA repeated measurement, without correction. Post-Hoc: Fisher's LSD (\*\* $p < 0.01$ ). The images on the right show an example of cytoplasmic (untranslocated) and nuclear (translocated) location of p65 in the cell. The graph shows how translocation was quantified, by using the similarity score (pixel similarity p65/nucleus). All cells with similarity scores higher than zero were considered as "translocated" cells.

(D) Graph showing the intensity of CD45RA (Y axis) and CD45RO (X axis) of all cells within the CD4<sup>+</sup> population in healthy controls (3 donors, 1 technical replicate) and individuals with *NAE1* variants (2 donors, 1 technical replicate) without anti-CD3/CD28 stimulation.

(E) Bar graph showing the percentages of CD45RA positive cells within the CD4 population in the healthy control (3 donors, 1 technical replicate) and individuals with *NAE1* variants (2 donors, 1 technical replicate), bar graph represents the mean value  $\pm$  SD Student's T-test (\* $p < 0.05$ ).

(F) Bar graphs showing percentage of CD3 positive but CD4 and CD8 negative T cells in individuals with *NAE1* variants (2 donors, 1 technical replicate) and healthy controls (4 donors, 1 technical replicate each) without anti-CD3/CD28 stimulation, bars represent mean  $\pm$  SD; Student's t test (\*\* $p < 0.01$ ).

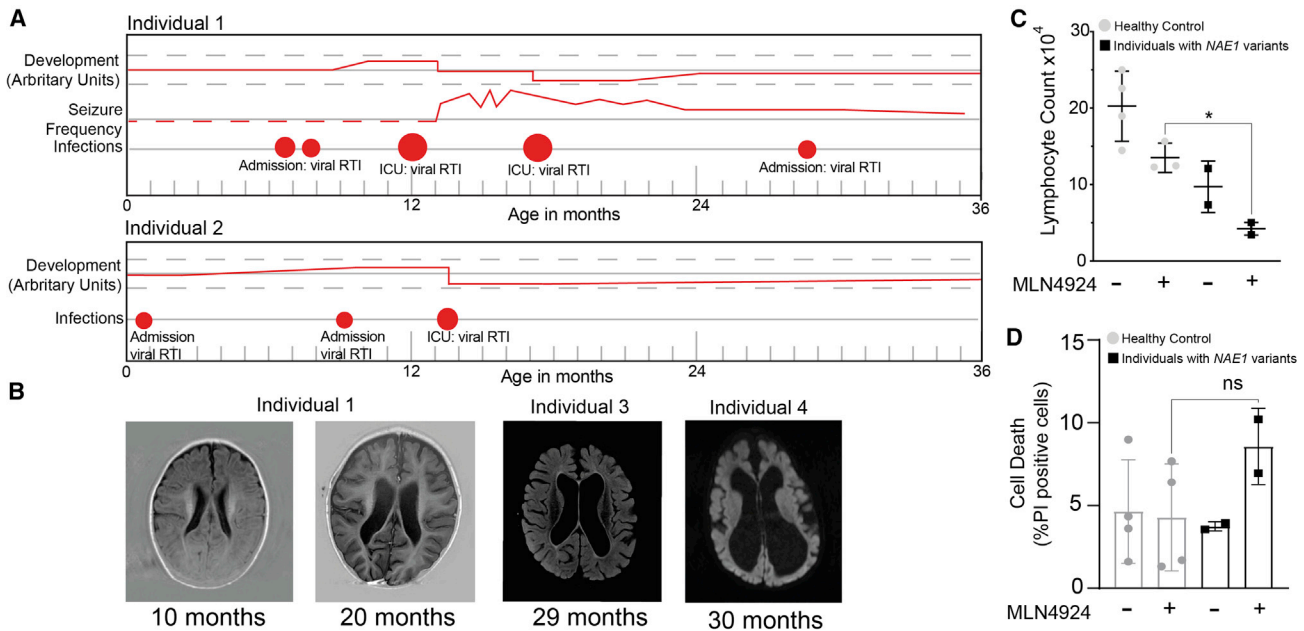

**Figure 6. Individuals with *NAE1* variants experience neurodegeneration and seizure frequency during infections**

(A) Timeline showing the development and seizure frequency (red line) in individual 1 and 2. Development and seizure frequency were quantified by parents of individuals 1 and 2 (arbitrary units). If the red line drops below the 0-point (the black line), this indicates that development decelerated. Circles indicate infections, massive red circles indicate infections requiring admissions. The bigger the circle, the longer the time of admission.

(B) MRI images of individual 1, individual 3, and individual 4 are shown. For individual 1, MRI was taken at 10 months of age and at 20 months of age (after ICU admission). Note the brain loss occurring between this time. The MRI of individual 3 was taken at approximately 29 months of age, 6–7 months after his seizures began which were treated with ACTH. For individual 4, brain MRI was obtained at the age of 2.5 years, showing severe brain loss, resulting from multiple severe infections.

(C) Bar graph showing the lymphocyte count after 1 day of anti-CD3 (0.1  $\mu\text{g}/\text{mL}$ ) stimulation with and without the addition of MLN4924 (200 nM) in healthy controls (3 donors, 1 technical replicate each) and lymphocytes of individuals with *NAE1* variants (2 donors, 1 technical replicate each). Bars represent mean value  $\pm$  SD, two-way ANOVA, post hoc: Fisher's LSD ( $*p < 0.05$ ).

(D) Bar graph showing the percentage of death cells (PI positive) over the total amount of cells (counted using Hoechst) in fibroblasts, with or without MLN4924 treatment (500 nM) in healthy controls (3 donors, 1 technical replicate each, gray bars) and individuals with *NAE1* variants (2 donors, 1 technical replicate each, black bars). Bars represent mean value  $\pm$  SD, two-way ANOVA, post hoc: Fisher's LSD. (not significant,  $p > 0.05$ ).

lymphocyte counts in individuals with *NAE1* variants, which was accompanied by decreased NF- $\kappa\text{B}$  translocation. These results provide in-depth support for the pathogenicity of the genetic variants and suggest that *NAE1* deficiency impairs homeostasis during cellular stress and leads to disturbances in (skeletal) development.

The pathogenicity of the *NAE1* variants was supported by the significant reduction of *NAE1* abundance, resulting in a lower cullin 1<sup>NEDD8</sup>/cullin 1 ratio. The unaltered *CUL1* mRNA levels argue against transcriptional regulation, and thus provide indirect support for increased stability of non-neddylated cullins, which are exposed to fewer neddylation cycles.<sup>56</sup> Since cullin function is controlled by cycles of cullin neddylation and deneddylation, maintaining a proper cullin 1<sup>NEDD8</sup>/cullin 1 ratio is crucial to ensure cullin-mediated functions.<sup>57</sup> As fibroblasts of individuals with *NAE1* genetic variants were more sensitive to MG132 treatment, we speculate that the altered cullin 1<sup>NEDD8</sup>/cullin 1 ratio results in proteasome dysfunction. However, it should be noted that non-cullin neddylation targets, which we did not study in this research, might also be involved in the pathophysiology.

Both the neurological and immunological phenotype of individuals with *NAE1* variants reflect impairments in development and stress response. During routine outpatient clinic visits, we found low to normal lymphocyte counts, but during infections, lymphopenia became more obvious. Lymphocyte survival in resting and activated conditions is partially regulated by NF- $\kappa\text{B}$  activation, which in turn is regulated by neddylation.<sup>50</sup> In lymphocytes of individuals with *NAE1* variants, NF- $\kappa\text{B}$  activation was severely decreased, which might explain the decreased lymphocyte counts both in resting and activated conditions. Anti-CD3/CD28 signaling requires upregulation of neddylation, which in turn influences activity of many other pathways in T cells.<sup>58</sup> One example is WNT/ $\beta$ -catenin signaling, important for thymic function.<sup>21,59,60</sup> Defective WNT signaling can explain the decreased numbers of naive T cells, as WNT signaling can keep T cells in a naive state, corresponding with low expression of AXIN2 in memory T cells.<sup>61</sup> Moreover, defective WNT signaling and subsequent thymic dysfunction can explain the increased percentages of double-negative ( $\text{CD4}^- \text{CD8}^-$ ) T cells, which might represent immature T cells leaving the

thymus prior to complete maturation. Thus, similar to the neurodegeneration, the lymphocyte phenotype might be the result of developmental and stress-mediated defects.

While the stress-mediated neurodegeneration was the most severe phenotypic feature in our cohort, additional neurodevelopmental abnormalities were seen, not related to neurodegeneration. This is not surprising, given the fact that recent evidence indicates that *NAE1* is essential for development, maintenance, and outgrowth of neuronal spines.<sup>10,59,62,63</sup> Regarding the infection-mediated neurodegeneration, several mechanisms might be involved. First, during cellular stress caused by infections, unfolded proteins accumulate, requiring neddylation-mediated Parkin and PINK1 activation<sup>13,64</sup> to break down these unfolded proteins and prevent neuronal apoptosis and brain damage. Dysfunction of these pathways has been implicated in the pathophysiology of Alzheimer and Parkinson disease.<sup>11,12,64</sup> Other pathways are also involved in neuronal integrity, like the neddylation-controlled WNT/ $\beta$ -catenin pathway.<sup>59</sup> Dysfunction of this pathway can result in loss of cell-cell adhesion and neuronal apoptosis.<sup>65</sup> Not only the integrity but also the excitability of neurons during stress is under the control of neddylation.<sup>63</sup> Mice with defective neddylation display decreased Nav1.1 stability during fever, leading to increased neuronal excitability and epilepsy.<sup>66</sup> Finally, in mice, double-negative T cells can significantly enhance neuroinflammation during brain injury.<sup>67</sup> Therefore, the high numbers of double-negative T cells found in individuals with *NAE1* variants might have enhanced neuroinflammation. Additional experiments using different stressors—preferably in neurons—will be an important step to reliably establish the link between neddylation, stress, and cell death, and how this links to stress-mediated neurodegeneration.

Currently, there is no gold standard how to elucidate pathophysiologic cellular mechanisms leading to a specific phenotype caused by variants of uncertain significance (VUSs). As a result, researchers tend to focus on the most severe clinical phenotypes. Instead, we propose that focusing on information-dense phenotypes could provide more insight in the underlying pathophysiology. In our case, focusing on the most severe phenotypic features would have led us to focus on the neurodegeneration and epilepsy, which probably would have given insight in the mechanism of disease in the brain, but would have overlooked the influence of faulty neddylation on the immune system and (bone) development. Our overarching view led to a clear pattern in lymphocyte values, that dropped significantly during infections, which resembled the neurodegeneration, that similarly worsened during infections. This framework allowed us to delineate the most important pathophysiological mechanism: during stress, neddylation needs to be upregulated, protecting cells from stress. We suspect individuals with *NAE1* variants are unable to adequately upregulate their neddylation for this purpose, resulting in stress-mediated cell death.

Naturally, the complexity and resources needed to discover the pathophysiology of VUSs limits the number of genetic diagnoses that can be made. When considering variants in pleiotropic genes, the wealth of pathways and phenotypic features that can be studied threatens to complicate this process even more. Therefore, smart prioritization is of the essence. This work exemplifies the power of a focus on the most informative features. If validated on a larger scale, this approach could be beneficial for complex VUSs in genes encoding pleiotropically acting proteins.

In conclusion, this study shows that *NAE1* deficiency leads to developmental delay, epilepsy, ischiopubic synchondrosis hypoplasia, and infection-triggered lymphopenia and neurodegeneration. It thereby unveils the importance of proper *NAE1* function in facilitating development and suggests a crucial role for neddylation in maintaining cellular homeostasis during cellular stress.

### Data code and availability

The authors declare that all data supporting the findings of this study are available within the paper and its supplemental information. As individuals in this study did not consent to publicly available access to their FastQ files, this will not be posted to a public repository such as the Gene Expression Omnibus, but their RNA sequencing data are available upon request. A list of significantly up- and downregulated genes identified with RNA sequencing in fibroblasts can be found in Table S5. The variants described in this study were entered in ClinVar (VCV001526415, VCV001526416, VCV001206325, VCV001676942).

### Supplemental information

Supplemental information can be found online at <https://doi.org/10.1016/j.ajhg.2022.12.003>.

### Acknowledgments

This work was supported by the Max Planck Society (D.R.), the VolkswagenStiftung (D.R.), the Agencia Nacional de Promoción Científica y Tecnológica, Argentina (D.R.) and the Fondo para la convergencia estructural del mercosur-FOCEM (COF 03/11) (D.R.). We would like to thank the parents of individual 1 for drafting Figure 6A.

### Author contributions

Concept: P.M.v.H. and I.J.J.M. Designing experiments: I.J.J.M., I.F.S., M.M.v.d.W., C.B., M.L., D.R., F.v.W., S.A.F., E.E.S.N., and P.M.v.H. Conducting experiments: I.J.J.M., I.F.S., M.M.v.d.W., C.B., M.L., N.G.A. Acquiring (medical) data of study participants and cells: I.J.J.M., Y.A.Z., L.V.S., J.B., J.P., M.L.H., J.C.G., S.H., A.H., F.V., M.P.G.M., M.L., P.M.v.H. Analyzing data: I.J.J.M., I.F.S., M.P.G.M., M.M.v.d.W. Genetic testing and interpretation of variants: M.P.G.M., G.v.H. Molecular predictions: M.P.G.M., H.R. Writing the manuscript: I.J.J.M. and P.M.v.H. Supervision of experiments and writing process: P.M.v.H., S.A.F., F.v.W., E.E.S.N., D.R.

S.A.F., D.R., and F.v.W. spent equal time and effort on supervision of the manuscript.

## Declaration of interests

The authors declare no competing interests.

Received: February 9, 2022

Accepted: December 7, 2022

Published: January 5, 2023

## References

1. Kerscher, O., Felberbaum, R., and Hochstrasser, M. (2006). Modification of proteins by ubiquitin and ubiquitin-like proteins. *Annu. Rev. Cell Dev. Biol.* 22, 159–180.
2. Enchev, R.I., Schulman, B.A., and Peter, M. (2015). Protein neddylation: Beyond cullin-RING ligases. *Nat. Rev. Mol. Cell Biol.* 16, 30–44.
3. Whitby, F.G., Xia, G., Pickart, C.M., and Hill, C.P. (1998). Crystal structure of the human ubiquitin-like protein NEDD8 and interactions with ubiquitin pathway enzymes. *J. Biol. Chem.* 273, 34983–34991.
4. Schulman, B.A., and Harper, J.W. (2009). Ubiquitin-like protein activation by E1 enzymes: The apex for downstream signalling pathways. *Nat. Rev. Mol. Cell Biol.* 10, 319–331.
5. Walden, H., Podgorski, M.S., Huang, D.T., Miller, D.W., Howard, R.J., Minor, D.L., Holton, J.M., and Schulman, B.A. (2003). The structure of the APPBP1-UBA3-NEDD8-ATP complex reveals the basis for selective ubiquitin-like protein activation by an E1. *Mol. Cell* 12, 1427–1437.
6. Malik-Chaudhry, H.K., Gaieb, Z., Saavedra, A., Reyes, M., Kung, R., Le, F., Morikis, D., and Liao, J. (2018). Dissecting distinct roles of NEDDylation E1 ligase heterodimer APPBP1 and UBA3 reveals potential evolution process for activation of ubiquitin-related pathways. *Sci. Rep.* 8, 10108.
7. Bohnsack, R.N., and Haas, A.L. (2003). Conservation in the mechanism of Nedd8 activation by the human AppBp1-Uba3 heterodimer. *J. Biol. Chem.* 278, 26823–26830.
8. Wada, H., Kito, K., Caskey, L.S., Yeh, E.T., and Kamitani, T. (1998). Cleavage of the C-terminus of NEDD8 by UCH-L3. *Biochem. Biophys. Res. Commun.* 251, 688–692.
9. Mendoza, H.M., Shen, L.N., Botting, C., Lewis, A., Chen, J., Ink, B., and Hay, R.T. (2003). NEDP1, a highly conserved cysteine protease that deNEDDylates cullins. *J. Biol. Chem.* 278, 25637–25643.
10. Vogl, A.M., Phu, L., Becerra, R., Giusti, S.A., Verschuere, E., Hinkle, T.B., Bordenave, M.D., Adrian, M., Heidersbach, A., Yankilevich, P., et al. (2020). Global site-specific neddylation profiling reveals that NEDDylated cofilin regulates actin dynamics. *Nat. Struct. Mol. Biol.* 27, 210–220.
11. Dil Kuazi, A., Kito, K., Abe, Y., Shin, R.W., Kamitani, T., and Ueda, N. (2003). NEDD8 protein is involved in ubiquitinated inclusion bodies. *J. Pathol.* 199, 259–266.
12. Chen, Y., Neve, R.L., and Liu, H. (2012). Neddylation dysfunction in Alzheimer's disease. *J. Cell Mol. Med.* 16, 2583–2591.
13. Choo, Y.S., Vogler, G., Wang, D., Kalvakuri, S., Iliuk, A., Tao, W.A., Bodmer, R., and Zhang, Z. (2012). Regulation of parkin and PINK1 by neddylation. *Hum. Mol. Genet.* 21, 2514–2523.
14. Liu, K., Chen, K., Zhang, Q., Zhang, L., Yan, Y., Guo, C., Qi, J., Yang, K., Wang, F., Huang, P., et al. (2019). TRAF6 neddylation drives inflammatory arthritis by increasing NF- $\kappa$ B activation. *Lab. Invest.* 99, 528–538.
15. Schoppmann, S.F., Vinatzer, U., Popitsch, N., Mittlböck, M., Liebmann-Reindl, S., Jomrich, G., Streubel, B., and Birner, P. (2013). Novel clinically relevant genes in gastrointestinal stromal tumors identified by exome sequencing. *Clin. Cancer Res.* 19, 5329–5339.
16. Soucy, T.A., Dick, L.R., Smith, P.G., Milhollen, M.A., and Brownell, J.E. (2010). The NEDD8 conjugation pathway and its relevance in cancer biology and therapy. *Genes Cancer* 1, 708–716.
17. Delgado, T.C., Barbier-Torres, L., Zubiete-Franco, I., Lopitz-Otsoa, F., Varela-Rey, M., Fernández-Ramos, D., and Martínez-Chantar, M.L. (2018). Neddylation, a novel paradigm in liver cancer. *Transl. Gastroenterol. Hepatol.* 3, 37.
18. Zubiete-Franco, I., Fernández-Tussy, P., Barbier-Torres, L., Simon, J., Fernández-Ramos, D., Lopitz-Otsoa, F., Gutiérrez-de Juan, V., de Davalillo, S.L., Duce, A.M., Iruzubieta, P., et al. (2017). Deregulated neddylation in liver fibrosis. *Hepatology* 65, 694–709.
19. Read, M.A., Brownell, J.E., Gladysheva, T.B., Hottel, M., Parent, L.A., Coggins, M.B., Pierce, J.W., Podust, V.N., Luo, R.S., Chau, V., and Palombella, V.J. (2000). Nedd8 modification of cull-1 activates SCF( $\beta$ TrCP)-dependent ubiquitination of I $\kappa$ B $\alpha$ . *Mol. Cell Biol.* 20, 2326–2333.
20. Liakopoulos, D., Büsgen, T., Brychzy, A., Jentsch, S., and Pause, A. (1999). Conjugation of the ubiquitin-like protein NEDD8 to cullin-2 is linked to von Hippel-Lindau tumor suppressor function. *Proc. Natl. Acad. Sci. USA* 96, 5510–5515.
21. Tripathi, R., Kota, S.K., and Srinivas, U.K. (2007). Cullin4B/E3-ubiquitin ligase negatively regulates  $\beta$ -catenin. *J. Biosci.* 32, 1133–1138.
22. Sugawara, K., Okuda, Y., Saijo, M., Nishi, R., Matsuda, N., Chu, G., Mori, T., Iwai, S., Tanaka, K., Tanaka, K., and Hanaoka, F. (2005). UV-induced ubiquitylation of XPC protein mediated by UV-DDB-ubiquitin ligase complex. *Cell* 121, 387–400.
23. Liu, L., Lee, S., Zhang, J., Peters, S.B., Hannah, J., Zhang, Y., Yin, Y., Koff, A., Ma, L., and Zhou, P. (2009). CUL4A abrogation augments DNA damage response and protection against skin carcinogenesis. *Mol. Cell* 34, 451–460.
24. Sobreira, N., Schiettecatte, F., Valle, D., and Hamosh, A. (2015). GeneMatcher: a matching tool for connecting investigators with an interest in the same gene. *Hum. Mutat.* 36, 928–930.
25. Shannon, C.E. (1948). A mathematical theory of communication. *Bell Syst. Tech. J.* 27, 623–656.
26. Haijes, H.A., Jaeken, J., and van Hasselt, P.M. (2020). Hypothesis: determining phenotypic specificity facilitates understanding of pathophysiology in rare genetic disorders. *J. Inher. Metab. Dis.* 43, 701–711.
27. Ten Berg, M.J., Huisman, A., Van Den Bemt, P.M.L.A., Schobben, A.F.A.M., Egberts, A.C.G., and Van Solinge, W.W. (2007). Linking laboratory and medication data: new opportunities for pharmacoepidemiological research. *Clin. Chem. Lab. Med.* 45, 13–19.
28. Buske, O.J., Girdea, M., Dumitriu, S., Gallinger, B., Hartley, T., Trang, H., Misyura, A., Friedman, T., Beaulieu, C., Bone, W.P., et al. (2015). PhenomeCentral: a portal for phenotypic and genotypic matchmaking of patients with rare genetic diseases. *Hum. Mutat.* 36, 931–940.
29. The 1000 Genomes Project Consortium, Auton, A., Abecasis, G.R., Altshuler, D.M., Durbin, R.M., Abecasis, G.R., Bentley, D.R., Chakravarti, A., Clark, A.G., Donnelly, P., et al. (2015). A global reference for human genetic variation. *Nature* 526, 68–74.
30. Zerbino, D.R., Achuthan, P., Akanni, W., Amode, M.R., Barrell, D., Bhai, J., Billis, K., Cummins, C., Gall, A., Girón, C.G., et al. (2018). Ensembl 2018. *Nucleic Acids Res.* 46, D754–D761.

31. Lek, M., Karczewski, K., Minikel, E., Samocha, K., Banks, E., Fennell, T., et al. (2016). Analysis of protein-coding genetic variation in 60,706 humans. *Nature* 536, 285–291.
32. Karczewski, K.J., Francioli, L.C., Tiao, G., Cummings, B.B., Alfoldi, J., Wang, Q., et al. (2020). The mutational constraint spectrum quantified from variation in 141,456 humans. *Nature* 581, 434–443.
33. Jiang, H., Wang, F., Dyer, N.P., and Wong, W.H. (2010). CisGenome browser: A flexible tool for genomic data visualization. *Bioinformatics* 26, 1781–1782.
34. Mijnheer, G., Lutter, L., Mokry, M., van der Wal, M., Scholman, R., Fleskens, V., Pandit, A., Tao, W., Wekking, M., Vervoort, S., et al. (2021). Conserved human effector Treg cell transcriptomic and epigenetic signature in arthritic joint inflammation. *Nat. Commun.* 12, 2710.
35. Li, H., and Durbin, R. (2009). Fast and accurate short read alignment with Burrows – Wheeler transform. *Bioinformatics* 25, 1754–1760.
36. Subramanian, A., Tamayo, P., Mootha, V.K., Mukherjee, S., Ebert, B.L., Gillette, M.A., Paulovich, A., Pomeroy, S.L., Golub, T.R., Lander, E.S., and Mesirov, J.P. (2005). Gene set enrichment analysis: A knowledge-based approach for interpreting genome-wide expression profiles. *Proc. Natl. Acad. Sci. USA* 102, 15545–15550.
37. Yu, G., Wang, L.G., Han, Y., and He, Q.Y. (2012). ClusterProfiler: An R package for comparing biological themes among gene clusters. *OMICS A J. Integr. Biol.* 16, 284–287.
38. Yang, X., Boehm, J.S., Yang, X., Salehi-Ashtiani, K., Hao, T., Shen, Y., Lubonja, R., Thomas, S.R., Alkan, O., Bhimdi, T., et al. (2011). A public genome-scale lentiviral expression library of human ORFs. *Nat Methods*. 8, 659–61.
39. Wiederschain, D., Wee, S., Chen, L., Loo, A., Yang, G., Huang, A., Chen, Y., Caponigro, G., Yao, Y.M., Lengauer, C., et al. (2009). Single-vector inducible lentiviral RNAi system for oncology target validation. *Cell Cycle* 8, 498–504.
40. Wee, S., Wiederschain, D., Maira, S.M., Loo, A., Miller, C., deBeaumont, R., Stegmeier, F., Yao, Y.M., and Lengauer, C. (2008). PTEN-deficient cancers depend on PIK3CB. *Proc. Natl. Acad. Sci. USA* 105, 13057–13062.
41. Muffels, I.J.J., Wiame, E., Fuchs, S.A., Massink, M.P.G., Rehmann, H., Musch, J.L.L., Van Haaften, G., Vertommen, D., van Schaftingen, E., and van Hasselt, P.M. (2021). NAA80 bi-allelic missense variants result in high-frequency hearing loss, muscle weakness and developmental delay. *Brain Commun.* 3, 1–32.
42. Köhler, S., Gargano, M., Matentzoglou, N., Carmody, L.C., Lewis-Smith, D., Vasilevsky, N.A., Danis, D., Balagura, G., Baynam, G., Brower, A.M., et al. (2021). The human phenotype ontology in 2021. *Nucleic Acids Res.* 49, D1207–D1217.
43. Ishii, A., Watkins, J.C., Chen, D., Hirose, S., and Hammer, M.F. (2017). Clinical implications of SCN1A missense and truncation variants in a large Japanese cohort with Dravet syndrome. *Epilepsia* 58, 282–290.
44. Kraulis, P.J. (1991). MOLSCRIPT. A program to produce both detailed and schematic plots of protein structures. *J. Appl. Cryst.* 24 (pt 5), 946–950.
45. Merritt, E.A., and Murphy, M.E. (1994). Raster3D version 2.0 A program for photorealistic molecular graphics. *Acta Crystallogr. D Biol. Crystallogr.* 50, 869–873.
46. Gao, X., Li, K., Fan, Y., Sun, Y., Luo, X., Wang, L., Liu, H., Gong, Z., Wang, J., Wang, Y., et al. (2019). Identification of RUNX2 variants associated with cleidocranial dysplasia. *Hereditas* 156, 31.
47. Matsushita, M., Kitoh, H., Kaneko, H., Mishima, K., Kadono, I., Ishiguro, N., and Nishimura, G. (2013). A novel SOX9 H169Q mutation in a family with overlapping phenotype of mild campomelic dysplasia and small patella syndrome. *Am. J. Med. Genet.* 161A, 2528–2534.
48. Wagner, T., Wirth, J., Meyer, J., Zabel, B., Held, M., Zimmer, J., Pasantes, J., Bricarelli, F.D., Keutel, J., Hustert, E., et al. (1994). Autosomal sex reversal and campomelic dysplasia are caused by mutations in and around the SRY-related gene SOX9. *Cell* 79, 1111–1120.
49. Ehrentraut, S.F., Curtis, V.F., Wang, R.X., Saeedi, B.J., Ehrentraut, H., Onyiah, J.C., Kelly, C.J., Campbell, E.L., Glover, L.E., Kominsky, D.J., and Colgan, S.P. (2016). Perturbation of neddylation-dependent NF- $\kappa$ B responses in the intestinal epithelium drives apoptosis and inhibits resolution of mucosal inflammation. *Mol. Biol. Cell* 27, 3687–3694.
50. Gerondakis, S., and Siebenlist, U. (2010). Roles of the NF- $\kappa$ B pathway in lymphocyte development and function. *Cold Spring Harb. Perspect. Biol.* 2, a000182.
51. Liapis, K., Tsagarakis, N.J., Panitsas, F., Taparkou, A., Liapis, I., Roubakis, C., Tsokanas, D., Vasileiou, P., Grigoriou, E., Kakioopoulos, G., et al. (2020). Causes of double-negative T-cell lymphocytosis in children and adults. *J. Clin. Pathol.* 73, 431–438.
52. Cui, D., Xiong, X., Sun, Y., and Zhao, Y. (2019). FBXW7 confers radiation survival by targeting p53 for degradation. *SSRN Electron. J.*
53. Nishitani, H., Shiomi, Y., Iida, H., Michishita, M., Takami, T., and Tsurimoto, T. (2008). CDK inhibitor p21 is degraded by a proliferating cell nuclear antigen-coupled Cul4-DDB1-Cdt2 pathway during S phase and after UV irradiation. *J. Biol. Chem.* 283, 29045–29052.
54. Ryu, J.H., Li, S.H., Park, H.S., Park, J.W., Lee, B., and Chun, Y.S. (2011). Hypoxia-inducible factor  $\alpha$  subunit stabilization by NEDD8 conjugation is reactive oxygen species-dependent. *J. Biol. Chem.* 286, 6963–6970.
55. Maghames, C.M., Lobato-Gil, S., Perrin, A., Trauchessec, H., Rodriguez, M.S., Urbach, S., Marin, P., and Xirodimas, D.P. (2018). NEDDylation promotes nuclear protein aggregation and protects the ubiquitin proteasome system upon proteotoxic stress. *Nat. Commun.* 9, 4376.
56. Wu, J.T., Lin, H.C., Hu, Y.C., and Chien, C.T. (2005). Neddylation and deneddylation regulate Cul1 and Cul3 protein accumulation. *Nat. Cell Biol.* 7, 1014–1020.
57. Liu, Q., Zhou, Y., Tang, R., Wang, X., Hu, Q., Wang, Y., and He, Q. (2018). Increasing the Unneddylated Cullin1 Portion Rescues the csn Phenotypes by Stabilizing Adaptor Modules To Drive SCF Assembly. *Mol. Cell Biol.* 38, e00109-17.
58. Cheng, Q., Liu, J., Pei, Y., Zhang, Y., Zhou, D., Pan, W., and Zhang, J. (2018). Neddylation contributes to CD4+ T cell-mediated protective immunity against blood-stage Plasmodium infection. *PLoS Pathog.* 14, e1007440.
59. Zhang, L., Jing, H., Li, H., Chen, W., Luo, B., Zhang, H., Dong, Z., Li, L., Su, H., Xiong, W.C., and Mei, L. (2020). Neddylation is critical to cortical development by regulating Wnt/ $\beta$ -catenin signaling. *Proc. Natl. Acad. Sci. USA* 117, 26448–26459.
60. Weerkamp, F., Baert, M.R.M., Naber, B.A.E., Koster, E.E.L., De Haas, E.F.E., Atkuri, K.R., van Dongen, J.J.M., Herzenberg, L.A., and Staal, F.J.T. (2006). Wnt signaling in the thymus is

- regulated by differential expression of intracellular signaling molecules. *Proc. Natl. Acad. Sci. USA* *103*, 3322–3326.
61. Tiemessen, M.M., Baert, M.R.M., Kok, L., van Eggermond, M.C.J.A., van den Elsen, P.J., Arens, R., and Staal, F.J.T. (2014). T cell factor 1 represses CD8 + effector T cell formation and function. *J. Immunol.* *193*, 5480–5487.
  62. Vogl, A.M., Brockmann, M.M., Giusti, S.A., MacCarrone, G., Vercelli, C.A., Bauder, C.A., Richter, J.S., Roselli, F., Hafner, A.S., Dedic, N., et al. (2015). Neddylation inhibition impairs spine development, destabilizes synapses and deteriorates cognition. *Nat. Neurosci.* *18*, 239–251.
  63. Brockmann, M.M., Döngi, M., Einsfelder, U., Körber, N., Refojo, D., and Stein, V. (2019). Neddylation regulates excitatory synaptic transmission and plasticity. *Sci. Rep.* *9*, 17935.
  64. Xiong, H., Wang, D., Chen, L., Choo, Y.S., Ma, H., Tang, C., Xia, K., Jiang, W., Ronai, Z., Zhuang, X., and Zhang, Z. (2009). Parkin, PINK1, and DJ-1 form a ubiquitin E3 ligase complex promoting unfolded protein degradation. *J. Clin. Invest.* *119*, 650–660.
  65. Chen, Y.Z. (2004). APP induces neuronal apoptosis through APP-BP1-mediated downregulation of  $\beta$ -catenin. *Apoptosis* *9* (4), 415–422.
  66. Chen, W., Luo, B., Gao, N., Li, H., Wang, H., Li, L., Cui, W., Zhang, L., Sun, D., Liu, F., et al. (2021). Neddylation stabilizes Nav1.1 to maintain interneuron excitability and prevent seizures in murine epilepsy models. *J. Clin. Invest.* *131*, e136956.
  67. Meng, H., Zhao, H., Cao, X., Hao, J., Zhang, H., Liu, Y., Zhu, M.S., Fan, L., Weng, L., Qian, L., et al. (2019). Double-negative T cells remarkably promote neuroinflammation after ischemic stroke. *Proc. Natl. Acad. Sci. USA* *116*, 5558–5563.



**Supplemental information**

**Bi-allelic variants in *NAE1* cause intellectual disability, ischiopubic hypoplasia, stress-mediated lymphopenia and neurodegeneration**

**Irena J.J. Muffels, Imre F. Schene, Holger Rehmann, Maarten P.G. Massink, Maria M. van der Wal, Corinna Bauder, Martha Labeur, Natalia G. Armando, Maarten H. Lequin, Michiel L. Houben, Jaques C. Giltay, Saskia Haitjema, Albert Huisman, Fleur Vansenne, Judith Bluvstein, John Pappas, Lala V. Shailee, Yuri A. Zarate, Michal Mokry, Gijs W. van Haften, Edward E.S. Nieuwenhuis, Damian Refojo, Femke van Wijk, Sabine A. Fuchs, and Peter M. van Hasselt**

## **Supplemental Note: Detailed case reports of individuals with *NAE1* genetic variants.**

### **Individual 1:**

The first individual is the second child of healthy, Dutch, non-consanguineous parents. During pregnancy, the girl was diagnosed with an aortic coarctation and a ventricular septal defect. After birth, several craniofacial dysmorphias were noted. She has underdeveloped denture and a strikingly asymmetrical palate. During infancy, failure to thrive, generalized hypotonia, mild developmental delay and feeding difficulties were noted. At the age of one she was admitted to the ICU due to a lower respiratory tract infection, which was treated with antibiotics and dexamethasone. This admission was followed by a loss of milestones and a debut of profound therapy resistant epilepsy. Brain MRI, which had been normal, now revealed brain atrophy as evidenced by enlarged ventricles, diminished white matter volume and a thin corpus callosum. Laboratory tests revealed lymphopenia, leukopenia, hyperglycemia, AST, ALT and AF increase, anemia and decreased immunoglobulin levels. Other laboratory values were within normal range. Currently, her development is still severely delayed. She cannot sit without support; she can produce a few sounds but no words.

### **Individual 2:**

Individual 2, is the first child of healthy, Dutch parents. His parents come from a region with known inbred population and cannot rule out distant relatedness. During pregnancy, he received multiple blood transfusions due to hemolysis as a result of rhesus incompatibility. At birth, craniofacial dysmorphias were noted: widely spaced eyes, a long small face, cheiloschisis, and an asymmetrical palate. His development was normal until the age of 14-months (rolling over at 7 months, sitting at 10 months). At 14 months, he was admitted to the ICU with severe pneumonia, and he was treated with antibiotics and dexamethasone. After ICU admission his development declined, he could not sit without support anymore. After initial regression, he slowly started to regain some of his developmental progress. Eventually, at two and a half years of age he was able to walk. Brain MRI showed diminished white matter volume, and thin corpus callosum. Laboratory tests revealed mild leukopenia and low immunoglobulin levels (G1, G2, G3 and M). He did not develop normal antibody titers after vaccination. During infections, lymphocytopenia and leukopenia were observed. He has recurrent episodes of Impetigo and HSV-1 infection, which can be severe. Currently, he can sit, walk and communicate verbally (produce complete sentences).

### **Individual 3:**

Individual 3 was born as the first child to healthy, consanguineous (first-degree cousins) parents. Pregnancy and birth were unremarkable. As an infant, plagiocephaly, sleep difficulties, hyporeflexia, low muscle tone and spasms were noted. For the spasms, he was first treated with Levetiracetam, but this was ineffective. He was then given

ACTH with resolution of the infantile spasms. He had lost developmental milestones with the spasms but regained some of them after 6-weeks of ACTH treatment. His EEG showed interictal tracing with generalized background slowing and multifocal epileptiform discharges. Brain MRI showed severe, diffuse white matter volume loss. At 14 months of age, his development was still delayed. He could roll, but could not sit unassisted, he could say about 3 words with meaning. At 2.5 years of age, he can roll, sit with support, vocalize, and knows parents from strangers. With vigabatrin (113 mg/kg/day), his epilepsy is treated effectively. On physical examination, three small hyperpigmented lesions (right abdomen and left leg) were noted.

#### Individual 4:

Individual 4 was born after normal pregnancy to healthy, non- consanguineous parents. After birth, anteverted nares, large appearing ears, epicanthal folds, narrow palpebral fissures were noted, together with limited range of motion at the elbows, knees and feet. As an infant, she developed epilepsy, and it became clear that her development was severely delayed. Seizures and development worsened significantly during and after infections accompanied by fever. She had multiple respiratory infections, urinary tract infections and bacteremia's, for which she was admitted to the hospital repeatedly. Brain MRI performed at the age of 4.5 years showed progressive global volume loss (compared to earlier brain MRI taken at age 2.5), with marked ventriculomegaly, thinning of the white matter and the corpus callosum, and decreased cerebral cortex volume.

**Figure S1: Analysis of bulk RNA sequencing data.**

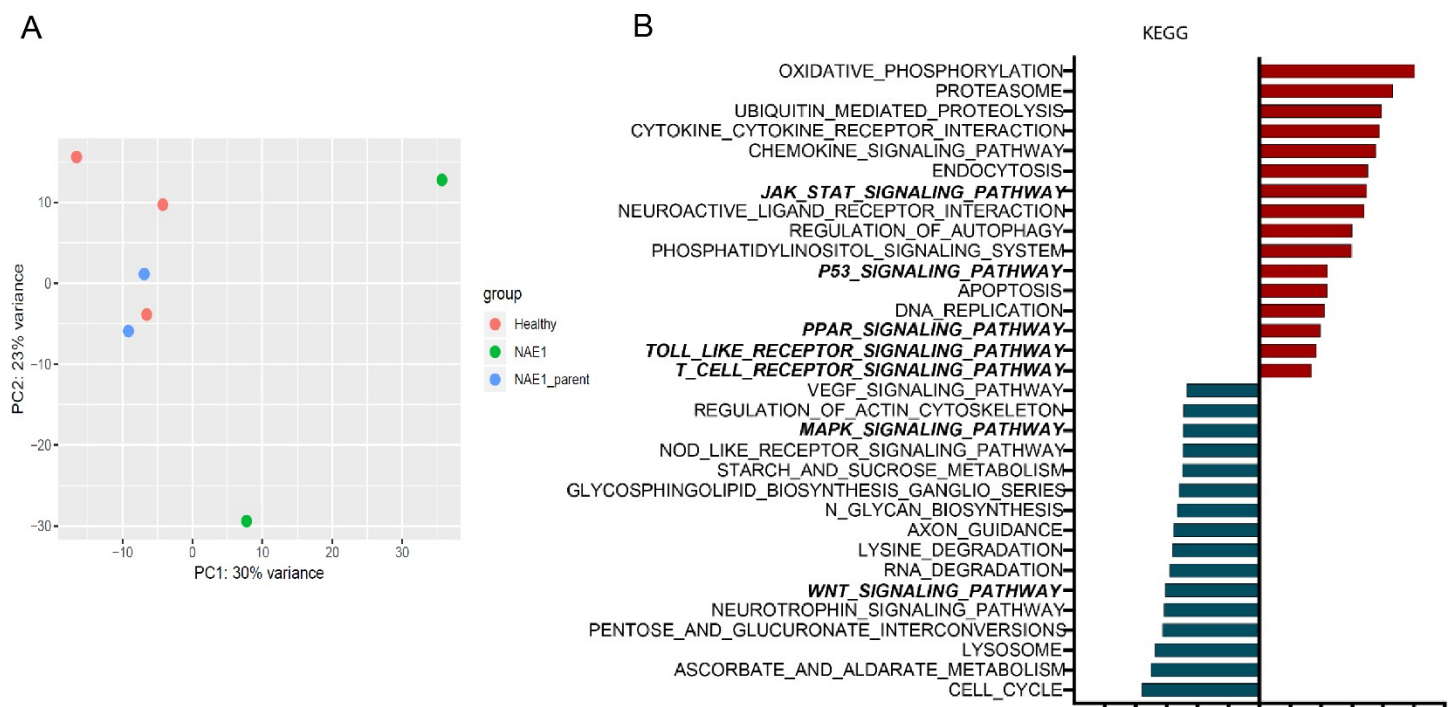

**Figure S1:** Analysis of bulk RNA sequencing data of individual 1 and individual 2 dermal fibroblasts, parents of individual 1 (heterozygous carriers), and three healthy controls. (A) PCA plot based on the top 2000 differentially expressed genes. (B) Pre-ranked Gene Set Enrichment analysis showing the top 32 significantly enriched (FDR<0.05) pathways (KEGG). Y-axis shows Normalized Enrichment Score (NES).

**Figure S2: Gating strategy of flow cytometry experiments.**

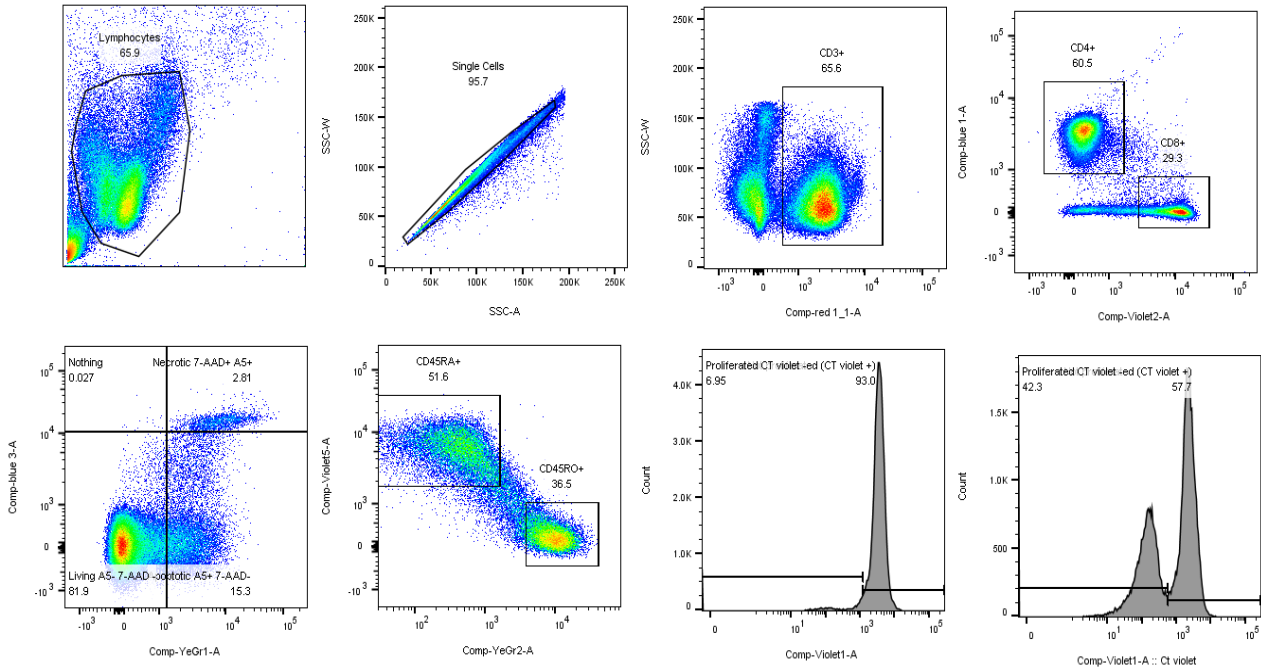

**Figure S2: Flow Cytometry Gating Strategy.** Lymphocytes were gated using FSC-A and SSC-A. Single cells were gated using SSC-A and SSC-W. Next, CD3, CD4, CD8, CD45RA, CD45RO cells were gated. Living cells were gated using Annexin V and 7-AAD staining.

**Figure S3: Imagestream Gating Strategy.**

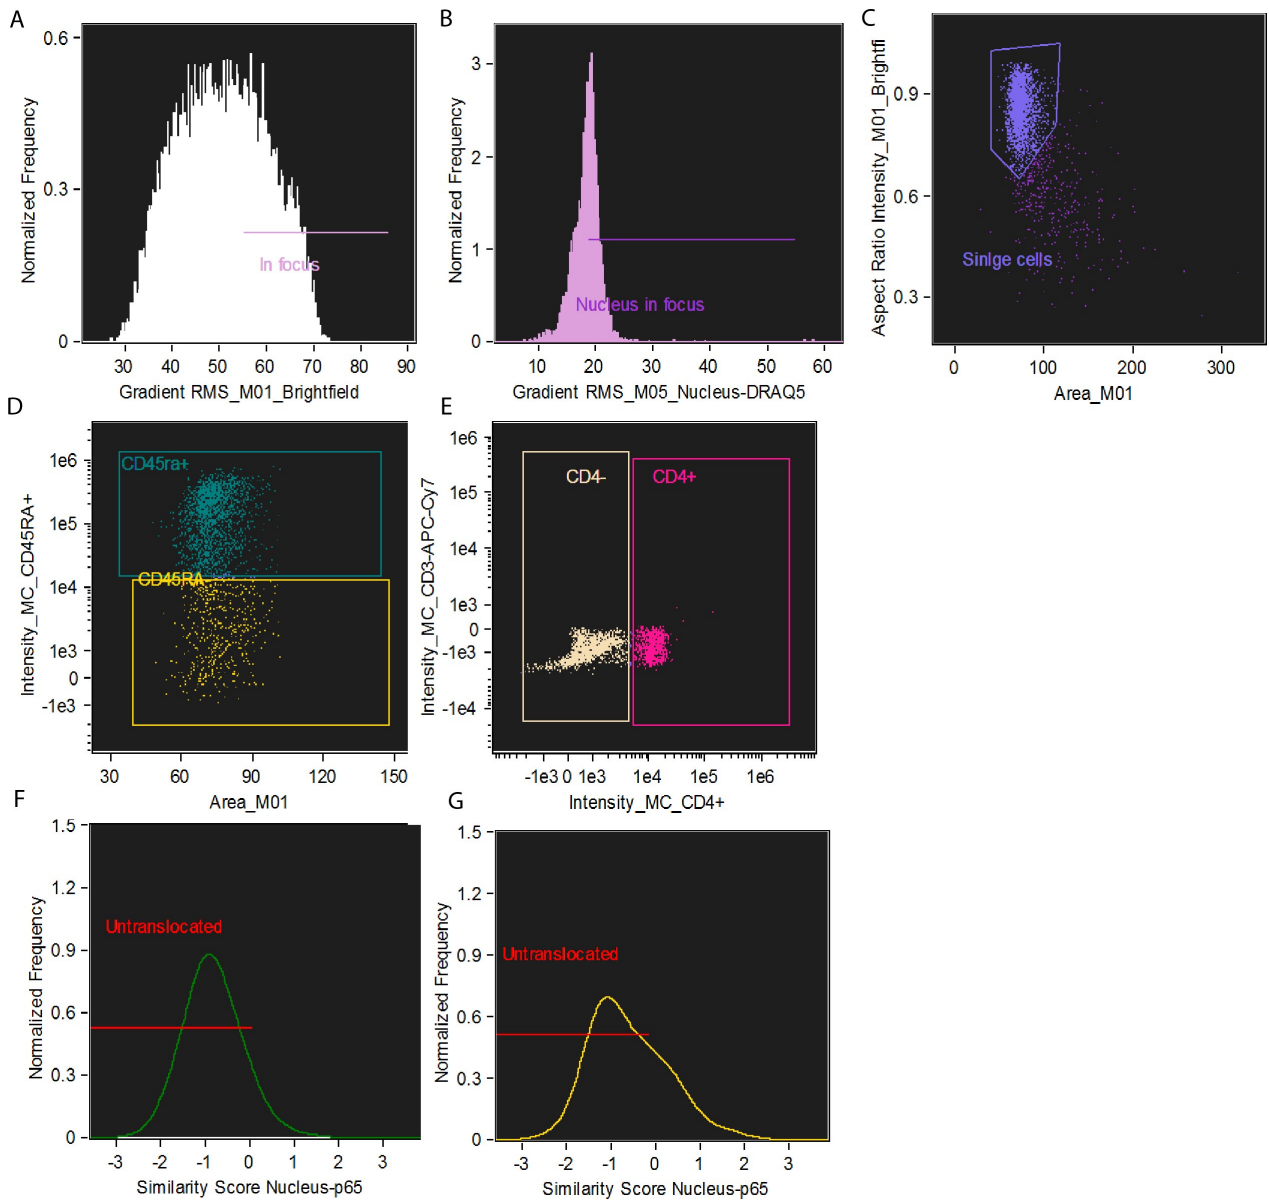

**Figure S3: Imagestream Gating Strategy.** (A) Using the Brightfield channel, cells out of focus were discarded (Gradient\_RMS\_M01). (B) Next, cells in focus in the nuclear channel were gated (Gradient\_RMS\_M05, nuclear channel). (C) Single cells were gated using brightfield Area\_M01 and Aspect\_Ratio\_M01. (D) Next, cells were gated on CD45RA and CD4 expression. (E) The bottom two images show unstimulated CD3 cells (left side, green line). Every similarity score with a value below 0 is gated as untranslocated (red line). (F) The bottom right image shows an example of stimulated CD3+ cells (yellow line).

**Figure S4:** Western blots and RNA sequencing data of individuals with *NAE1* genetic variants.

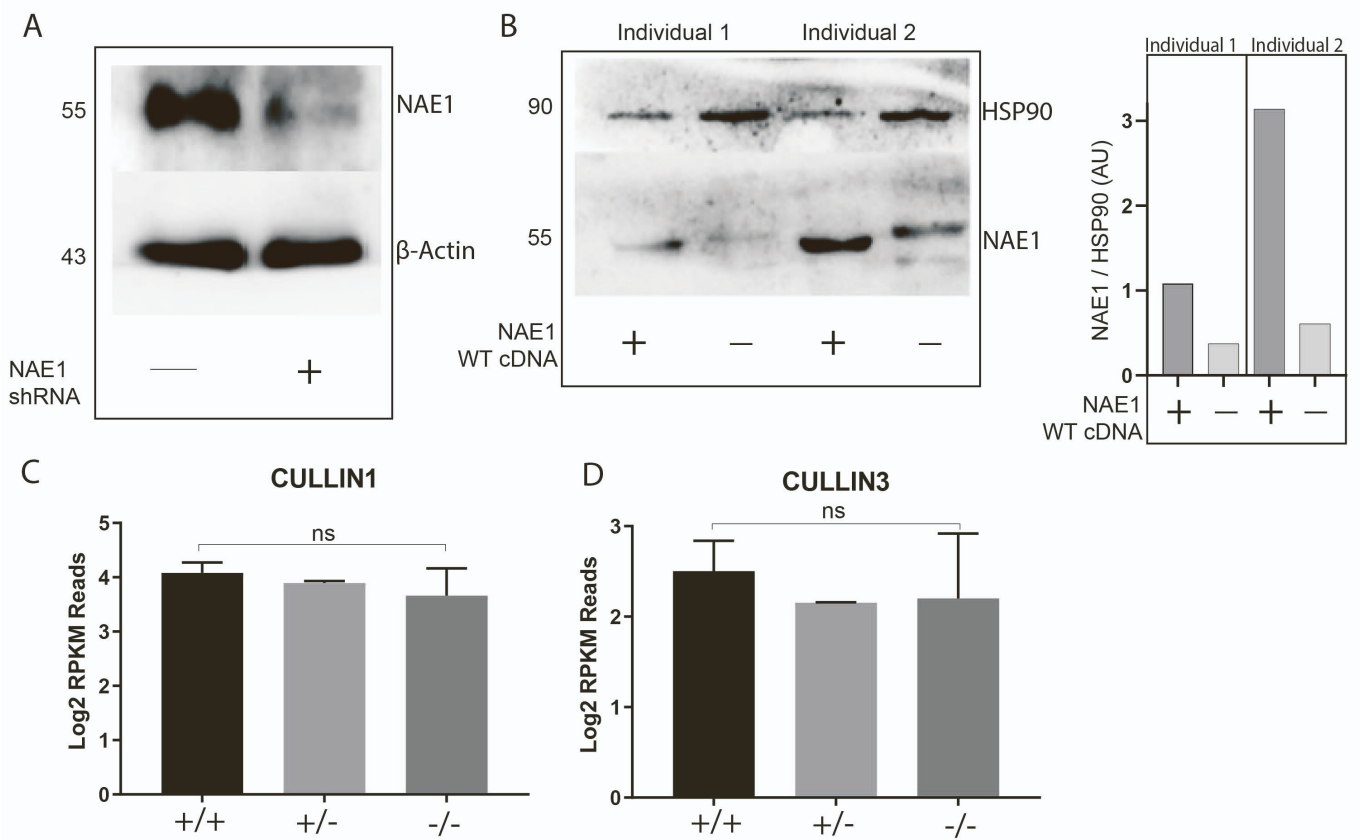

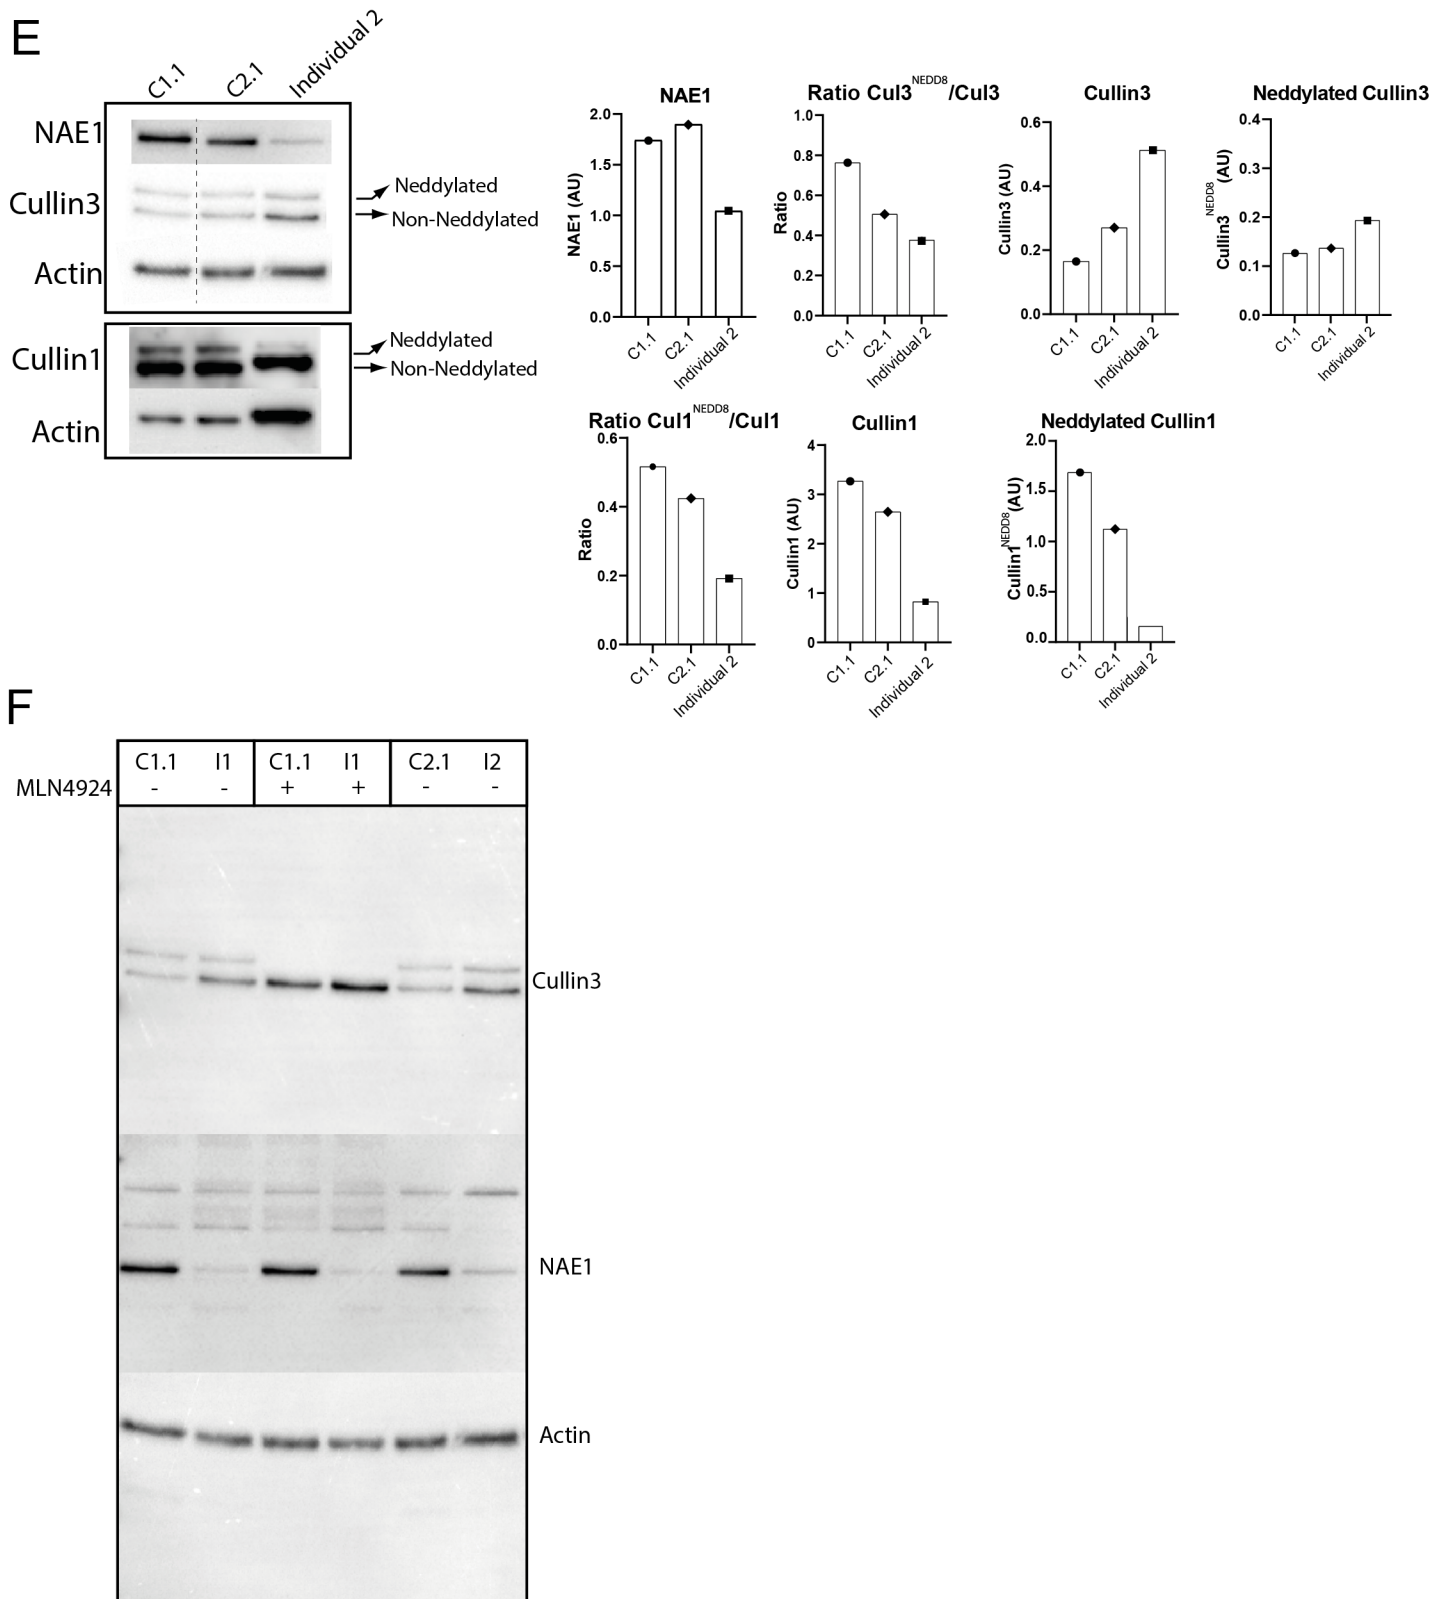

**Figure S4:** (A) Western blot showing NAE1 abundance in heterozygous carriers of NAE1 genetic variants (parents of individual 1) with and without addition of NAE1 shRNA.  $\beta$ -actin was used as a housekeeper. (B) Western blot showing NAE1 protein levels in individual 1 and individual 2 with and without vector expressing NAE1 wildtype cDNA ('rescue'). HSP90 was used as a housekeeper. The quantification of the blots is shown in bar graphs. Quantification was performed using ImageLab (Biorad). (C, D) CULLIN1 and CULLIN3 log<sub>2</sub> RPKM reads derived from fibroblast RNA sequencing data. Bar shows mean log<sub>2</sub> RPKM reads of all donors (+/+ N=3, +/- N=2, -/- N=2). Error bars show SD of the log<sub>2</sub> RPKM reads. (E) Western blot showing cullin1, cullin3 and NAE1 abundance in two controls (C1.1 and C2.1) and individual 2. The bar graphs show the quantification of the blots, all normalized to actin. Quantification was performed using ImageLab. The dotted line indicates where the blots were cut. Quantification was performed using ImageLab. (F) Uncropped blots used for Figure S4F (NAE1, actin and cullin3).





**Supplementary Figure S7: Representative example of microscopic images taken after MG132 treatment in a healthy control and individual 1.**

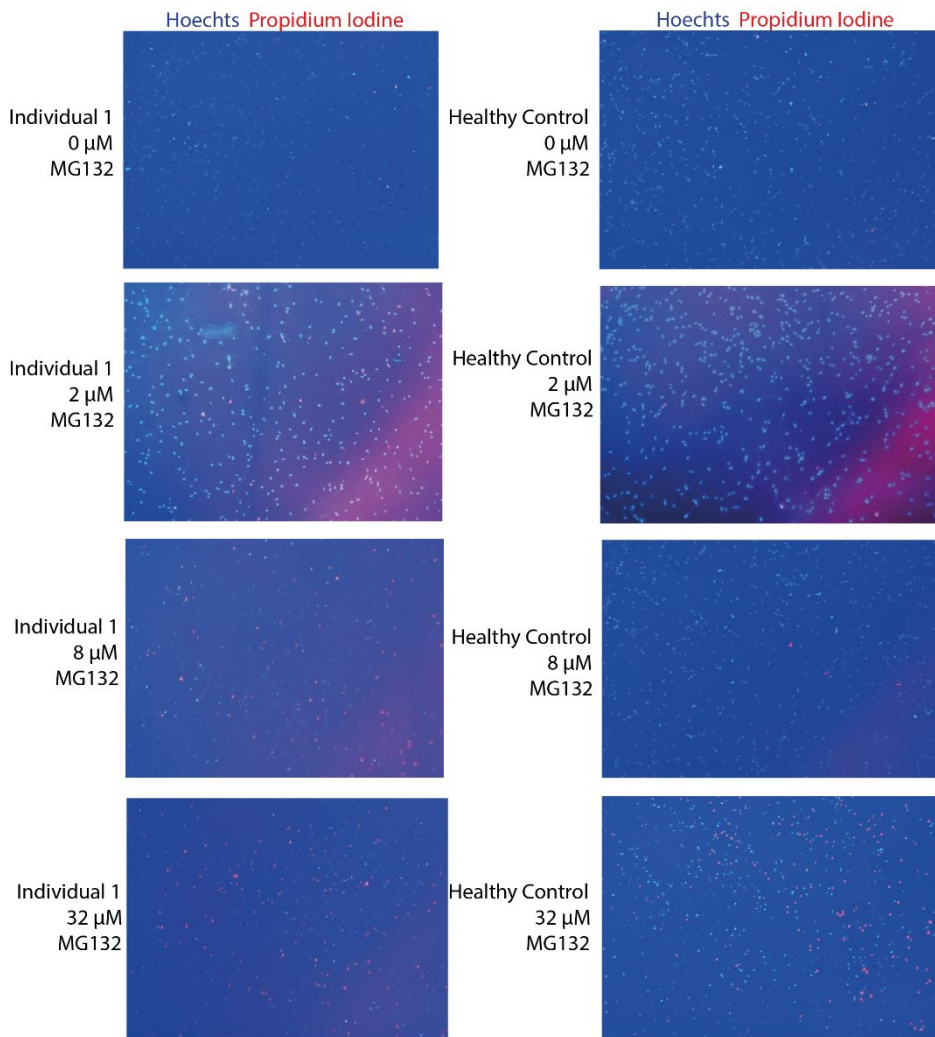

**Supplementary Figure S7:** Representative example of microscopic images taken after MG132 treatment in a healthy control and individual 1. Staining was performed by incubating fibroblasts with Hoechts (1:2000) and PI (1:20) for 5 minutes. Cell death was calculated by dividing the number of PI positive cells by the total number of cells.

**Table S1:** Overview of genetic variants identified with WES (after filtering) in individual 1.

| Gene           | Mode of inheritance   | Variant                                                      | GnomAD                                                                             | CADD Score | PolyPhen-2                 | Mutation Taster                                         | Prediction                      |
|----------------|-----------------------|--------------------------------------------------------------|------------------------------------------------------------------------------------|------------|----------------------------|---------------------------------------------------------|---------------------------------|
| <i>NAE1</i>    | Compound heterozygous | NM_003905.4:<br>c.147G>C<br>p.Leu49Phe<br>Nonsynonymous      | pLI=0, 1x reported in GnomAD.                                                      | 31.        | Probably damaging (0.99).  | Disease Causing<br>Might Introduce splice site changes. | Variant of Unknown Significance |
| <i>NAE1</i>    | Compound heterozygous | NM_003905.4:<br>c.254G>A,<br>p.Arg85Gln<br>Nonsynonymous     | pLI=0, 4x reported in GnomAD.                                                      | 24         | Probably Damaging (0.99).  | Disease Causing                                         | Variant of Unknown Significance |
| <i>TASOR</i>   | Compound heterozygous | NM_001112736.2<br>c.1840T>A,<br>p.Leu614Ile<br>Nonsynonymous | pLI=1<br>Reported 318x in GnomAD.<br>MAF $\geq$ 0.001                              | 23.1       | Possibly Damaging (0.615). | Disease Causing                                         | Benign (BS1, BS2)               |
| <i>TASOR</i>   | Compound heterozygous | NM_001112736.2<br>c.3094A>G<br>p.Ile1032Val<br>Nonsynonymous | pLI = 1.<br>Reported 36x in GnomAD.<br>MAF <0.001.                                 | 16         | Benign (0.003).            | Polymorphism.                                           | Benign (BS1, BS2)               |
| <i>PIWIL2</i>  | De Novo               | NM_00113572<br>1.2c.1899C>T,<br>p.Gly633=<br>Synonymous      | pLI=0.                                                                             | 10.5       | NA                         | Disease Causing, introduces a cryptic splice site       | Likely benign (BP1, BP5).       |
| <i>DPY19L4</i> | De novo               | NM_181787.3<br>c.1338T>C<br>p.Gly446=<br>Synonymous          | GnomAD:<br>pLI=0<br>3x reported:<br>other missense variant at the same AA position | 3.5        | NA                         | Disease Causing, Introduces Splice site changes.        | Likely benign (BP1, BP5)        |

**Table S1:** Overview of genetic variants identified after filtering in individual 1 with Whole Exome Sequencing (WES). Filtering methods can be found in the methods section. The genetic variants are sorted based on Combined Annotation Dependent Depletion (CADD) score (high-low). The 'Prediction' Column represents the likelihood of pathogenicity based on the "Standards and Guidelines for the Interpretation of Sequence Variants" drafted by the American College of Medical Genetics and Genomics (ACMG). (1) Additionally, MutationTaster(2), PolyPhen-2(3), CADD(4) score and GnomAD constraint metrics(5) (Probability of loss of function intolerance, pLI) were used. To indicate the likelihood of pathogenicity, we employed a color scheme. For CADD scores, values 0-10 were colored green, 10-20 were colored yellow and values >20 were colored red. For Polyphen-2, probably damaging was colored red, possible damaging was colored yellow and benign was colored green. For MutationTaster, 'Disease Causing variants' were colored red and 'polymorphisms' were colored green. In the column showing the predictions using the ACMG guidelines, a Variant of Unknown Significance was colored red and likely benign was colored green. Based on these predictions and functional studies, the *NAE1* genetic variants were considered likely pathogenic.

**Table S2:** Comparison of the phenotype of individuals with Dravet syndrome (MIM: 607208) caused by *SCN1A* mutations to the phenotype of individual 4 from the *NAE1* cohort.

| Phenotypic Feature          | Dravet Syndrome | Individual 4 | Cohort of individuals with <i>NAE1</i> genetic variants |
|-----------------------------|-----------------|--------------|---------------------------------------------------------|
| Short stature               | -0.5 SDS        | -5.0 SDS     | -1, -1.5, -2.3 SDS                                      |
| Microcephaly                | +               | -            | -                                                       |
| <b>Facial abnormalities</b> | -               | +            | +                                                       |
| Wide nasal bridge           | -               | +            | +                                                       |
| Long philtrum               | -               | +            | +                                                       |
| Anteverted nares            | -               | +            | +                                                       |

|                                                         |   |    |   |
|---------------------------------------------------------|---|----|---|
| Large ears                                              | - | +  | + |
| Epicanthal folds                                        | - | +  | + |
| Narrow palpebral fissures                               | - | +  | - |
| Thick lower lip vermilion                               | - | +  | - |
| Broad Philtrum                                          | - | +  | + |
| Lymphopenia                                             | - | +  | + |
| <b>Other</b>                                            |   |    |   |
| Recurrent infections                                    | - | +  | + |
| Ischiopubic hypoplasia                                  | - | +  | + |
| <b>Neurological Abnormalities</b>                       | + | +  | + |
| Seizures                                                | + | +  | + |
| Seizure onset in the first year of life                 | + | NA | + |
| Seizure triggered by fever                              | + | +  | + |
| Psychomotor development stagnates.                      | + | +  | + |
| Mental decline                                          | + | +  | + |
| Behavioral problems                                     | + | -  | - |
| Learning disabilities                                   | + | +  | + |
| Global brain atrophy on MRI                             | + | +  | + |
| EEG with irregular generalized spike and wave complexes | + | NA | - |
| Microcephaly                                            | + | -  | - |
| Ataxia                                                  | + | NA | - |
| Limited knee extension                                  | + | +  | - |
| Muscle Weakness                                         | + | NA | + |
| Dysgenesis of the hippocampus                           | + | +  | + |

**Table S2:** In individual 4, both a heterozygous truncating mutation in the *SCN1A* gene as well as a genetic variant in the *NAE1* gene were identified. To distinguish the clinical phenotype caused by each of the genetic variants, the phenotypic features of Dravet syndrome(6)(MIM: 607208) were compared to all phenotypic features observed in individual 4. Truncating *SCN1A* mutations result mostly in Dravet syndrome. As individual 4 has a truncating mutation in *SCN1A*, features of Dravet syndrome were used for comparison. The characteristic facial features, short stature, lymphopenia, frequent infections and ischiopubic hypoplasia have never been identified in Dravet disease, and therefore suggest an additional role for the genetic variants in the *NAE1* gene in disease pathophysiology.

**Table S3:** List of 24 most specific phenotypes (with the highest occurrence ratio).

| HPO code   | HPO name                                      | Associated genes | Individual1 | Individual2 | Individual3 | Individual4 | Percentage of cohort | Occurrence Ratio |
|------------|-----------------------------------------------|------------------|-------------|-------------|-------------|-------------|----------------------|------------------|
| HP:0008822 | Hypoplastic ischiopubic rami                  | 1                | X           | X           | X           | X           | 100                  | 100              |
| HP:0006834 | Developmental stagnation at onset of seizures | 1                | X           | -           | X           | X           | 75                   | 75               |
| HP:0410256 | Infection associated lymphopenia              | 1                | X           | X           | -           | X           | 75                   | 75               |
| HP:0031397 | Reduced proportion of naive T cells           | 1                | X           | X           | NA          | NA          | 50                   | 50               |
| HP:0030887 | Increased lymphocyte apoptosis                | 1                | X           | X           | NA          | NA          | 50                   | 50               |
| HP:0410255 | Transient lymphopenia                         | 2                | X           | X           | X           | -           | 75                   | 37.5             |
| HP:0030374 | Decreased proportion of memory B cells        | 2                | X           | X           | X           | NA          | 50                   | 25               |

|            |                                         |     |   |   |    |    |     |       |
|------------|-----------------------------------------|-----|---|---|----|----|-----|-------|
| HP:0025539 | Abnormal B cell subset distribution     | 2   | X | X | NA | NA | 50  | 25    |
| HP:0031869 | Recurrent joint dislocation             | 4   | X | X | NA | NA | 50  | 12.5  |
| HP:0007281 | Developmental stagnation                | 12  | X | X | X  | X  | 100 | 8.3   |
| HP:0002265 | Large fleshy ears                       | 11  | X | X | -  | X  |     | 6.81  |
| HP:0003173 | Hypoplastic pubic bone                  | 15  | X | X | X  | X  | 100 | 6.66  |
| HP:0010975 | Abnormal B cell count                   | 9   | X | X | NA | NA | 50  | 5.55  |
| HP:0001041 | Facial erythema                         | 6   | X | - | -  | -  | 25  | 4.16  |
| HP:0045025 | Narrow palpebral fissure                | 39  | X | X | X  | X  | 100 | 2.56  |
| HP:0007874 | Almond-shaped palpebral fissure         | 41  | X | X | X  | X  | 100 | 2.44  |
| HP:0002344 | Progressive neurologic deterioration    | 43  | X | X | X  | X  | 100 | 2.32  |
| HP:0200005 | Abnormal shape of the palpebral fissure | 44  | X | X | X  | X  | 100 | 2.27  |
| HP:0002850 | Decreased circulating total IgM         | 26  | X | X | NA | NA | 50  | 1.92  |
| HP:0009103 | Aplasia/hypoplasia involving the pelvis | 57  | X | X | X  | X  | 100 | 1.754 |
| HP:0025540 | Abnormal T cell subset distribution     | 33  | X | X | NA | NA | 50  | 1.51  |
| HP:0002180 | Neurodegeneration                       | 77  | X | X | X  | X  | 100 | 1.75  |
| HP:0011839 | Abnormal T cell count                   | 46  | X | X | X  | X  | 50  | 1.08  |
| HP:0001888 | Lymphopenia                             | 107 | X | X | NA | NA | 50  | 0.70  |

**Table S3:** Overview of the most specific phenotypes as depicted in Figure 3. The first two rows represent the phenotype and the HPO codes attached to the phenotype name. The third column shows the number of genetic diseases associated with the phenotype, as assessed using the Human Phenotype Ontology.(7) Columns four to seven show which individuals display the phenotype, X means the phenotype is present, - means the phenotype is not present, and NA means the phenotype was not assessed. If the phenotype was not assessed, it was considered 'not present' for the calculation of column 8 (percentage). The occurrence ratio is the value of column 8 divided by the value of column 3.

**Table S4: Overview of primers used for this study.**

| Construct                     | Targeting sequence                                                                       |
|-------------------------------|------------------------------------------------------------------------------------------|
| NAE1 Tet-PkLo-Puro            | 5'-CCGGAGTCCTATGATTTGGATCACTCGAGTGATCCAAATCATAGGACTTTTTTTG54-3'                          |
| pLenti-CMV-Puro NAE1          | 5'-GAATTCTGCAGTCGACATGGCGCAGCTGGGA-3'<br>3'-GCTGTCTAGACTCGAGCTACAACCTGGAAAGTTGCTGAAGT-5' |
| NAE1 sequencing primer        | 5'-GGCTCCAGAAGATGAAGAGAA-3'                                                              |
| Plko-tet-on sequencing Primer | 5'-ATTACGCCAAGGTCGACTTAACCCT-3'                                                          |

**Table S5:** Overview of significantly up- and downregulated genes identified with RNA sequencing.

| Gene     | Adjusted p-value | Z-Score HC1 | Z-Score HC2 | Z-Score HC3 | Z-Score Father | Z-Score Mother | Z-Score Individual1 | Z-score Individual2 | Log2 Fold Change I1 | Log2 Fold Change I2 |
|----------|------------------|-------------|-------------|-------------|----------------|----------------|---------------------|---------------------|---------------------|---------------------|
| ADA2     | 0.03585676       | 2.176       | -0.55       | 0.03        | -0             | -0.364         | -0.65               | -0.637              | -2.639              | -2.542              |
| ADAMTS8  | 0.02301275       | -0.46       | 2.224       | -0.093      | -0.34          | -0.154         | -0.589              | -0.589              | -5.763              | -5.763              |
| ADAMTSL4 | 1.72E-05         | 1.018       | -0.45       | 0.607       | 0.364          | 0.9949         | -1.08               | -1.45               | -1.852              | -3.202              |
| AKAP6    | 0.02207786       | 0.955       | -0.51       | 1.393       | 0.765          | -0.873         | -1.011              | -0.72               | -3.498              | -1.815              |
| AKR1C2   | 0.0456592        | 2.159       | 0.146       | -0.443      | -0.04          | -0.604         | -0.668              | -0.555              | -5.456              | -2.796              |
| AMOT     | 0.01333326       | -0.2        | 1.246       | -0.325      | 0.07           | 1.3758         | -1.247              | -0.922              | -2.028              | -1.354              |
| AMPH     | 0.04072475       | 0.044       | 1.687       | -0.47       | 1.026          | -0.525         | -1.041              | -0.721              | -7.565              | -2.098              |
| ARHGAP45 | 0.00015617       | -0.14       | -0.45       | 0.318       | 1.902          | 0.3394         | -0.985              | -0.985              | -6.492              | -6.492              |
| ATP2A3   | 0.00727996       | 0.551       | -0.43       | 1.644       | 0.781          | -0.693         | -0.94               | -0.917              | -6.185              | -5.004              |
| AXIN2    | 7.88E-05         | 1.456       | -0.01       | -0.693      | 1.262          | -0.127         | -0.995              | -0.895              | -7.993              | -3.713              |
| B4GAT1   | 0.03114516       | 0.877       | 0.481       | 0.665       | -0.57          | 1.0486         | -1.288              | -1.215              | -1.381              | -1.29               |
| BMPER    | 0.00775421       | 0.129       | 1.917       | 0.289       | -0.27          | 0.0078         | -1.041              | -1.035              | -1.391              | -1.38               |
| BOC      | 0.03355107       | 0.17        | 0.501       | 0.028       | -0.14          | 1.7381         | -1.307              | -0.984              | -1.381              | -1.009              |
| BTN3A2   | 0.04321401       | 0.16        | 0.479       | -0.101      | 0.302          | 1.576          | -1.555              | -0.861              | -6.624              | -1.526              |
| C20orf96 | 0.04361249       | 0.783       | 0.161       | 0.858       | 0.225          | 0.7691         | -1.21               | -1.587              | -1.513              | -2.238              |
| CAMK2N1  | 1.10E-07         | 1.311       | 0.661       | 0.231       | -0.04          | 0.4884         | -1.469              | -1.18               | -2.948              | -1.971              |
| CASZ1    | 0.04958066       | 1.869       | 0.138       | -0.167      | 0.326          | -0.029         | -1.253              | -0.885              | -5.171              | -2.054              |
| CD302    | 0.03355107       | 0.402       | 1.123       | -0.255      | 0.533          | 0.728          | -1.763              | -0.768              | -3.48               | -1.032              |
| CD82     | 0.0109587        | -0.48       | 1.155       | 0.757       | 0.38           | 0.716          | -1.309              | -1.222              | -2.01               | -1.815              |
| CDH4     | 0.00292178       | 1.496       | 0.196       | 0.567       | 0.445          | -0.192         | -1.338              | -1.173              | -1.572              | -1.337              |
| CDK18    | 0.0437208        | -0.05       | -0.45       | 2.194       | 0.018          | -0.571         | -0.579              | -0.567              | -7.312              | -5.591              |
| CDON     | 0.03061071       | 0.047       | 0.282       | -0.07       | -0.5           | 2.0023         | -0.66               | -1.106              | -1.368              | -3.08               |
| CELSR1   | 0.04874031       | -0.09       | 1.598       | -0.73       | 0.048          | 1.0595         | -0.966              | -0.92               | -4.376              | -3.628              |
| CHRD     | 0.00138544       | 0.509       | 0.241       | -0.745      | 1.293          | 0.9565         | -1.127              | -1.127              | -5.823              | -5.823              |
| CILP2    | 0.00281157       | 0.251       | 0.181       | 1.61        | -0.45          | 0.6964         | -1.146              | -1.146              | -6.088              | -6.088              |
| CLEC2A   | 0.01419896       | 0.816       | -0.13       | -0.691      | 1.902          | -0.516         | -0.691              | -0.691              | -8.302              | -8.302              |
| CLEC2B   | 0.00013394       | 1.331       | -0.13       | -0.603      | 1.504          | -0.434         | -0.892              | -0.773              | -5.977              | -3.167              |
| CLMN     | 0.01653896       | -0.39       | 0.277       | -0.228      | 2.129          | -0.315         | -0.737              | -0.737              | -3.946              | -3.946              |
| CNNM1    | 0.02807154       | -0.93       | 0.906       | 1.501       | 0.544          | -0.155         | -0.932              | -0.932              | -5.224              | -5.224              |
| COL10A1  | 0.04153762       | 0.238       | -0.02       | -0.071      | 2.058          | -0.493         | -0.854              | -0.854              | -5.363              | -5.363              |
| COL6A3   | 0.00051898       | 0.45        | 1.023       | 0.89        | -0.25          | 0.5322         | -1.087              | -1.559              | -1.179              | -1.843              |
| COL7A1   | 0.01159841       | 1.196       | -0.52       | -0.273      | 0.799          | 1.0304         | -0.99               | -1.244              | -1.426              | -1.939              |
| COL8A2   | 6.74E-05         | 0.3         | 1.03        | 1.232       | 0.39           | -0.592         | -1.032              | -1.329              | -1.895              | -3.007              |
| COX7A1   | 0.00021423       | 1.263       | 0.053       | -0.003      | 1.37           | -0.609         | -1.005              | -1.069              | -2.699              | -3.113              |
| CPXM2    | 1.53E-06         | 1.858       | -0.14       | 0.772       | -0.34          | -0.284         | -0.896              | -0.964              | -3.008              | -3.69               |
| CRYBG1   | 1.25E-05         | 1.415       | 0.673       | -0.477      | 0.157          | 0.6258         | -1.331              | -1.062              | -3.856              | -2.269              |
| CSPG4    | 4.54E-06         | 1.455       | 0.557       | -0.062      | 0.748          | -0.279         | -1.155              | -1.264              | -1.826              | -2.093              |
| CTSK     | 0.00991428       | 1.517       | 0.937       | -0.392      | -0.09          | 0.272          | -1.313              | -0.927              | -1.732              | -1.138              |
| CYB5R2   | 0.00018635       | 0.077       | -0.14       | 0.266       | 2.004          | -0.315         | -0.964              | -0.927              | -3.368              | -3.039              |
| DENND2A  | 1.57E-05         | 0.022       | 1.138       | -0.357      | 1.584          | -0.46          | -0.963              | -0.963              | -7.599              | -7.599              |
| DGCR6    | 0.01241277       | 0.649       | 0.592       | -0.447      | 0.856          | 0.9454         | -1.175              | -1.422              | -2.489              | -4.097              |
| DHCR24   | 0.0036859        | 1.391       | 1.009       | -0.86       | 0.036          | 0.4522         | -0.858              | -1.169              | -1.653              | -2.735              |
| DHRS13   | 0.00074085       | -0.01       | -0.08       | 1.46        | 0.653          | 0.4879         | -1.405              | -1.106              | -4.925              | -2.439              |

|           |            |       |       |        |       |        |        |        |        |        |
|-----------|------------|-------|-------|--------|-------|--------|--------|--------|--------|--------|
| DNM1      | 2.43E-05   | -0.17 | 0.635 | 1.552  | -0.45 | 0.6647 | -1.206 | -1.031 | -3.422 | -2.403 |
| DPF3      | 0.02310761 | -0.36 | 0.612 | 1.61   | -0.6  | 0.7196 | -0.803 | -1.172 | -1.717 | -3.481 |
| DPYSL3    | 0.00052457 | 1.565 | 0.385 | 0.227  | 0.638 | -0.503 | -1.065 | -1.247 | -1.48  | -1.824 |
| ECM1      | 0.00697725 | 1.849 | 0.074 | 0.096  | -0.03 | 0.234  | -0.973 | -1.251 | -1.14  | -1.527 |
| EFNA5     | 0.00839476 | 0.083 | 1.308 | -0.642 | -0.64 | 1.482  | -0.796 | -0.796 | -5.849 | -5.849 |
| EGR2      | 0.0332212  | -0.53 | 0.082 | 2.015  | 0.489 | -0.651 | -0.703 | -0.703 | -5.909 | -5.909 |
| ELOVL2    | 0.01862053 | -0.39 | 1.233 | -0.2   | -0.32 | 1.5545 | -1.012 | -0.861 | -6.66  | -3.089 |
| ENPP1     | 0.00292178 | -0.66 | 1.1   | -0.081 | 1.528 | 0.081  | -1.174 | -0.792 | -4.632 | -1.866 |
| EPHB2     | 0.00697725 | -0.47 | 1.723 | 0.152  | -0.23 | 0.8284 | -1.133 | -0.876 | -2.866 | -1.828 |
| ERMP1     | 0.00338071 | 0.918 | 0.855 | -0.356 | 1.032 | 0.0769 | -1.403 | -1.122 | -1.87  | -1.395 |
| FBLN7     | 1.66E-05   | 0.08  | -0.29 | -0.149 | 0.739 | 1.751  | -1.047 | -1.086 | -2.601 | -2.806 |
| FGF9      | 0.00396068 | -0.8  | 1.879 | -0.116 | 0.656 | 0.0455 | -0.834 | -0.834 | -6.476 | -6.476 |
| FHOD3     | 0.02506544 | 1.644 | -0.43 | 0.432  | 0.827 | -0.529 | -0.785 | -1.16  | -1.301 | -2.215 |
| FMNL1     | 0.04321401 | 0.57  | 0.232 | -0.196 | 1.356 | 0.6152 | -1.434 | -1.144 | -2.831 | -1.898 |
| FST       | 0.01419896 | -0.67 | -0.44 | 0.115  | 1.445 | 1.303  | -0.984 | -0.772 | -2.295 | -1.599 |
| GDF6      | 0.01862053 | 1.94  | 0.668 | -0.122 | -0.34 | -0.442 | -0.94  | -0.761 | -2.429 | -1.739 |
| GJA1      | 0.00164499 | 1.305 | 0.431 | 0.504  | -0.06 | 0.4501 | -1.015 | -1.619 | -1.103 | -1.963 |
| GJD3      | 0.04361249 | 0.547 | -0.21 | 0.473  | -0.16 | 1.6578 | -1.153 | -1.153 | -7.004 | -7.004 |
| GPR153    | 0.01121289 | 0.473 | -0.18 | 0.888  | 0.145 | 1.2314 | -1.548 | -1.012 | -1.995 | -1.165 |
| GPR3      | 0.04432331 | 0.735 | 0.098 | 0.455  | 0.688 | 0.8556 | -1.538 | -1.293 | -6.739 | -3.001 |
| GRIA1     | 4.54E-06   | 2.16  | -0.35 | 0.136  | -0.08 | -0.508 | -0.692 | -0.674 | -7.954 | -5.479 |
| HAS2      | 0.00775421 | 0.18  | 0.626 | -0.43  | 1.703 | 0.0595 | -0.749 | -1.389 | -1.178 | -2.855 |
| HECW1     | 0.0129608  | 0.61  | 0.89  | -0.267 | 1.396 | -0.293 | -1.214 | -1.122 | -4.566 | -3.398 |
| HHIPL1    | 0.00164664 | 1.345 | 0.042 | -0.058 | 0.079 | 1.0455 | -1.428 | -1.024 | -2.485 | -1.509 |
| HLA-B     | 0.04072475 | 0.035 | -0.91 | 1.304  | -0.12 | 1.4044 | -0.757 | -0.952 | -1.609 | -2.261 |
| HR        | 1.81E-06   | 0.705 | -0.51 | 0.843  | 0.402 | 1.0836 | -1.319 | -1.209 | -3.397 | -2.739 |
| ICAM5     | 0.01623189 | -0.42 | -0.47 | 1.543  | -0.24 | 1.2971 | -0.793 | -0.926 | -2.26  | -3.101 |
| IER5      | 0.00238366 | -0.23 | 0.365 | 1.121  | 0.002 | 1.1973 | -1.462 | -0.993 | -2.165 | -1.288 |
| IL15RA    | 0.0246276  | 0.462 | -0.42 | 0.334  | -0.3  | 1.8664 | -1.098 | -0.849 | -3.658 | -2.099 |
| IL18      | 0.03631202 | -0.18 | -0.56 | 0.023  | 2.186 | -0.167 | -0.651 | -0.651 | -6.24  | -6.24  |
| IL1RAP    | 0.03585676 | 1.432 | 0.368 | -0.751 | 0.437 | 0.706  | -1.379 | -0.812 | -2.255 | -1.132 |
| IPMK      | 0.03013895 | 0.584 | 1.489 | 0.38   | -0.19 | 0.2565 | -1.382 | -1.133 | -1.683 | -1.313 |
| IRS2      | 0.01862053 | 0.023 | -0.52 | 0.78   | 0.449 | 1.5347 | -1.144 | -1.118 | -1.359 | -1.323 |
| ISM2      | 0.0202337  | -0.72 | -0.54 | 1.414  | 1.457 | -0.168 | -0.722 | -0.722 | -6.275 | -6.275 |
| KCNB1     | 0.01619268 | 1.485 | 0.518 | 0.644  | 0.337 | -0.925 | -1.14  | -0.918 | -5.846 | -2.663 |
| KCNC3     | 0.00021423 | 1.386 | 0.141 | 1.145  | -0.14 | -0.21  | -1.159 | -1.159 | -6.319 | -6.319 |
| KCNIP3    | 0.01862053 | 1.441 | 0.255 | 1.003  | -0.04 | -0.334 | -1.044 | -1.284 | -1.342 | -1.745 |
| KCNS1     | 6.95E-05   | 0.158 | 0.62  | 0.73   | 1.028 | 0.2673 | -1.402 | -1.402 | -6.918 | -6.918 |
| KIAA1549  | 0.00991428 | 0.719 | 0.825 | 1.36   | 0.051 | -0.831 | -1.014 | -1.11  | -1.945 | -2.252 |
| KIAA1958  | 0.00309789 | 0.78  | 0.89  | 0.519  | 0.451 | 0.1639 | -1.112 | -1.692 | -1.071 | -1.766 |
| KRTAP1-1  | 0.03197017 | 1.818 | 0.275 | 0.597  | -0.32 | -0.356 | -1.073 | -0.939 | -8.311 | -3.408 |
| LAMB1     | 0.01862053 | 0.949 | 1.271 | -0.777 | 0.08  | 0.6727 | -1.167 | -1.03  | -1.278 | -1.113 |
| LAPTM5    | 0.00641507 | -0.13 | -0.45 | -0.418 | 2.159 | 0.1857 | -0.673 | -0.673 | -6.67  | -6.67  |
| LGALS9    | 0.00248602 | -0.4  | 0.746 | 0.434  | 1.649 | -0.29  | -1.071 | -1.071 | -5.793 | -5.793 |
| LIN7A     | 0.04432331 | 2.073 | -0.44 | -0.389 | -0.4  | 0.5102 | -0.559 | -0.788 | -1.895 | -3.897 |
| LINC00707 | 0.00564295 | 0.873 | 1.275 | -0.915 | 0.938 | -0.256 | -0.957 | -0.957 | -6.862 | -6.862 |

|              |            |       |       |        |       |        |        |        |        |        |
|--------------|------------|-------|-------|--------|-------|--------|--------|--------|--------|--------|
| LINC00900    | 0.04958066 | 2     | 0.236 | -0.577 | 0.319 | -0.29  | -0.844 | -0.844 | -5.003 | -5.003 |
| LINC01139    | 0.03374528 | -0.82 | 0.779 | 1.487  | 0.854 | -0.66  | -0.82  | -0.82  | -7.353 | -7.353 |
| LOC101927809 | 0.01513948 | -0.1  | -0.17 | 2.032  | -0.09 | 0.2139 | -0.943 | -0.943 | -8.35  | -8.35  |
| LOXL4        | 1.72E-05   | -0.01 | 1.773 | 0.832  | -0.12 | -0.555 | -0.925 | -0.993 | -2.493 | -2.886 |
| LRIG1        | 0.00543979 | -0.91 | 0.971 | 0.164  | 1.12  | 0.7954 | -1.182 | -0.958 | -2.612 | -1.836 |
| LRP11        | 0.00157294 | 0.043 | 1.164 | -0.263 | 0.679 | 0.9164 | -1.426 | -1.113 | -1.478 | -1.111 |
| LTBP4        | 1.26E-07   | 0.49  | -0.08 | 1.188  | 0.147 | 0.9016 | -1.231 | -1.412 | -2.246 | -2.948 |
| LUM          | 2.90E-05   | 0.085 | 0.692 | 0.879  | 0.72  | 0.4362 | -1.204 | -1.607 | -1.198 | -1.703 |
| MAF          | 0.00011392 | 2.119 | 0.027 | -0.444 | 0.2   | -0.422 | -0.769 | -0.711 | -7.528 | -4.071 |
| MAN1A1       | 0.01862053 | -0.03 | 1.627 | -0.37  | -0.05 | 0.9217 | -1.339 | -0.754 | -2.432 | -1.13  |
| MAOA         | 0.03061071 | 0.342 | 0.27  | -0.721 | 2.01  | -0.458 | -0.721 | -0.721 | -6.003 | -6.003 |
| MARCH9       | 0.00569747 | 1.925 | -0.69 | 0.298  | -0.13 | 0.3667 | -0.953 | -0.819 | -7.408 | -3.208 |
| MATN2        | 0.00056662 | 1.149 | 0.553 | -0.709 | 0.053 | 1.1676 | -0.942 | -1.272 | -1.804 | -3.108 |
| MC4R         | 0.01862053 | 2.244 | -0.23 | -0.446 | -0.12 | -0.46  | -0.493 | -0.493 | -9.408 | -9.408 |
| MDFI         | 0.02506544 | -0.65 | 1.288 | -0.391 | 1.575 | -0.261 | -0.779 | -0.779 | -6.459 | -6.459 |
| MDK          | 0.03252576 | -0.48 | 0.114 | 1.55   | 0.674 | 0.3615 | -0.716 | -1.503 | -1.135 | -3.544 |
| MEIS2        | 0.00991428 | 0.349 | 0.827 | -0.374 | -0    | 1.5044 | -0.896 | -1.41  | -1.048 | -1.798 |
| MFSD10       | 0.02858347 | 1.163 | -0.46 | 0.776  | 0.853 | 0.1537 | -1.213 | -1.268 | -1.054 | -1.106 |
| MGARP        | 0.02722563 | 1.846 | -0.25 | -0.042 | -0.13 | 0.6218 | -1.17  | -0.868 | -8.546 | -2.366 |
| MMP11        | 0.01544699 | -0.35 | -0    | 1.007  | 0.366 | 1.3574 | -1.356 | -1.026 | -6.564 | -2.409 |
| MOCOS        | 3.81E-05   | -0.01 | -0.12 | -0.022 | 2.126 | -0.317 | -0.81  | -0.842 | -3.02  | -3.352 |
| MPP4         | 0.00248602 | 2.104 | 0.216 | -0.557 | 0.1   | -0.446 | -0.709 | -0.709 | -6.468 | -6.468 |
| MSL2         | 0.00874296 | 0.4   | 0.877 | 0.332  | 0.654 | 0.6091 | -1.567 | -1.306 | -1.235 | -1.014 |
| MSTN         | 3.01E-06   | -0.37 | 2.117 | 0.316  | -0.27 | -0.296 | -0.748 | -0.748 | -9.181 | -9.181 |
| MTSS1L       | 0.00961871 | 0.4   | -0.21 | 0.528  | 0.118 | 1.5675 | -0.912 | -1.487 | -1.041 | -1.871 |
| MX1          | 0.00697725 | 1.941 | -0.53 | 0.727  | -0.08 | -0.625 | -0.756 | -0.679 | -6.608 | -3.595 |
| MXRA5        | 7.27E-05   | 0.767 | 1.428 | -0.459 | -0.01 | 0.6027 | -0.964 | -1.367 | -1.851 | -3.772 |
| MYLK         | 0.02506544 | 2.085 | 0.075 | 0.124  | -0.3  | -0.279 | -0.794 | -0.915 | -1.383 | -1.654 |
| MYRIP        | 0.01755076 | 2.242 | -0.2  | -0.241 | -0.23 | -0.518 | -0.526 | -0.526 | -7.39  | -7.39  |
| NA           | 9.99E-06   | -0.23 | -0.27 | 0.585  | 1.639 | 0.5402 | -1.107 | -1.152 | -3.073 | -3.415 |
| NA           | 0.00814197 | 1.089 | -0.13 | 0.909  | -0.44 | 0.958  | -1.147 | -1.242 | -2.03  | -2.318 |
| NA           | 0.01898174 | 0.283 | 0.775 | -0.35  | 0.559 | 1.2674 | -1.451 | -1.083 | -7.581 | -2.379 |
| NA           | 0.04072475 | -0.63 | 0.814 | -0.814 | 0.676 | 1.5804 | -0.814 | -0.814 | -5.782 | -5.782 |
| NES          | 4.24E-10   | -0.34 | 1.538 | -0.27  | 0.874 | 0.4306 | -1.131 | -1.105 | -3.431 | -3.215 |
| NFATC2       | 0.00709268 | 2.09  | -0.12 | -0.538 | 0.381 | -0.369 | -0.777 | -0.667 | -6.689 | -3.165 |
| NFE2L3       | 7.12E-05   | 0.159 | -0.6  | 0.815  | 1.3   | 0.6877 | -1.212 | -1.147 | -3.654 | -3.117 |
| PBX3         | 0.02008894 | 1.62  | 0.751 | -0.547 | 0.356 | -0.076 | -1.341 | -0.763 | -2.646 | -1.199 |
| PCOLCE       | 0.03518198 | -0.13 | 0.027 | 0.989  | -0.21 | 1.5631 | -1.114 | -1.131 | -1.089 | -1.107 |
| PHLDA1       | 0.01862053 | 1.608 | 0.203 | -0.472 | 1.025 | -0.394 | -0.947 | -1.023 | -1.391 | -1.532 |
| PITPNM3      | 0.00684464 | -0.13 | 1.515 | -0.616 | 0.098 | 1.1241 | -1.171 | -0.816 | -2.514 | -1.466 |
| PKN3         | 0.03374528 | 0.149 | -0.17 | 0.01   | 1.738 | 0.5438 | -1.295 | -0.979 | -2.359 | -1.557 |
| PLTP         | 0.04958066 | 1.006 | 1.224 | 0.758  | -0.19 | -0.52  | -1.196 | -1.086 | -1.469 | -1.308 |
| PPP2R2B      | 0.04762812 | 1.971 | 0.008 | -0.134 | 0.484 | -0.585 | -0.872 | -0.872 | -4.657 | -4.657 |
| PRELP        | 0.02301275 | 0.102 | -0.58 | 2.153  | -0.19 | -0.096 | -0.708 | -0.689 | -3.732 | -3.435 |
| PRLR         | 0.01862053 | 0.417 | 1.443 | -0.963 | 1.102 | -0.24  | -0.851 | -0.907 | -3.094 | -3.71  |
| PSG1         | 0.0025378  | 2.022 | 0.604 | -0.233 | -0.48 | -0.485 | -0.678 | -0.756 | -2.843 | -3.842 |

|            |            |       |       |        |       |        |        |        |        |        |
|------------|------------|-------|-------|--------|-------|--------|--------|--------|--------|--------|
| PSG5       | 0.0089704  | 1.78  | 0.517 | -0.756 | -0.18 | 0.4725 | -1.082 | -0.752 | -2.585 | -1.488 |
| RALGPS1    | 0.02881424 | -0.52 | -0.13 | 0.339  | 1.893 | 0.35   | -1.076 | -0.855 | -5.3   | -2.535 |
| RGCC       | 0.01898174 | -0.73 | 0.378 | -0.15  | 2.055 | -0.088 | -0.732 | -0.732 | -8.162 | -8.162 |
| RIMS2      | 0.00540232 | -0.02 | 0.415 | -0.808 | 1.193 | 1.2763 | -1.03  | -1.03  | -4.609 | -4.609 |
| RTN4RL1    | 0.04432331 | 2.139 | -0.21 | 0.006  | 0.073 | -0.536 | -0.755 | -0.722 | -6.275 | -4.509 |
| RUNX2      | 0.00224238 | 1.51  | -0.02 | -0.014 | 0.47  | 0.5453 | -1.029 | -1.463 | -1.625 | -2.918 |
| S1PR3      | 0.00557986 | 0.366 | 0.742 | -0.706 | -0.43 | 1.7607 | -0.989 | -0.745 | -3.69  | -2.023 |
| SALL2      | 0.0129608  | 1.177 | 0.654 | -0.15  | -0.1  | 0.9364 | -1.482 | -1.04  | -6.966 | -2.129 |
| SAMD14     | 0.03197017 | 2.044 | -0.1  | 0.169  | 0.115 | -0.48  | -0.793 | -0.955 | -1.742 | -2.327 |
| SDC4       | 0.02506544 | -0.86 | 0.287 | 1.428  | 0.393 | 0.8342 | -0.794 | -1.284 | -1.188 | -2.242 |
| SERPINE2   | 0.0343186  | 1.949 | 0.348 | -0.373 | 0.368 | -0.675 | -0.659 | -0.958 | -1.372 | -2.326 |
| SFTA1P     | 0.03252576 | -0.5  | -0.41 | -0.418 | 2.037 | 0.6161 | -0.665 | -0.665 | -8.078 | -8.078 |
| SHISAL1    | 0.01120488 | 0.72  | -0.4  | 0.209  | 1.843 | -0.728 | -0.784 | -0.856 | -2.55  | -3.087 |
| SLC29A4    | 0.00697725 | 1.676 | -0.29 | 0.073  | 0.686 | 0.1235 | -1.286 | -0.98  | -6.802 | -2.446 |
| SLC43A1    | 0.00395203 | 0.672 | 0.134 | 1.079  | -0.13 | 0.8821 | -1.536 | -1.102 | -5.661 | -2.147 |
| SLC8A1-AS1 | 0.01121289 | 2.209 | -0.3  | -0.454 | -0.01 | -0.197 | -0.627 | -0.627 | -5.9   | -5.9   |
| SOX9       | 0.03197017 | 1.306 | -0.29 | 0.268  | -0.58 | 1.3202 | -0.936 | -1.087 | -1.764 | -2.219 |
| SPON2      | 7.88E-05   | -0.53 | -0.11 | 0.185  | 2.133 | -0.202 | -0.734 | -0.734 | -7.151 | -7.151 |
| STAP2      | 0.00874296 | 0.5   | 0.842 | -0.115 | 1.295 | 0.0648 | -1.343 | -1.242 | -6.871 | -4.005 |
| STEAP2     | 0.00243819 | 0.01  | 0.809 | 0.943  | 0.064 | 0.8259 | -1.681 | -0.971 | -2.404 | -1.154 |
| STMN3      | 0.0456592  | -0.22 | -0.45 | -0.514 | 2.164 | 0.2361 | -0.532 | -0.676 | -2.086 | -3.425 |
| STX1B      | 0.00382025 | 0.813 | -0.05 | 0.646  | -0    | 1.2161 | -1.363 | -1.258 | -2.409 | -2.097 |
| TCTN2      | 0.02881424 | -0.05 | 0.886 | -0.346 | 0.655 | 1.2486 | -1.548 | -0.841 | -2.859 | -1.189 |
| TGFA       | 0.00091112 | 2.206 | -0.31 | -0.015 | -0.25 | -0.306 | -0.708 | -0.618 | -6.479 | -3.291 |
| TGFBR3L    | 0.03895544 | 1.374 | 0.299 | 1.175  | -0.53 | -0.169 | -1.174 | -0.979 | -3.467 | -2.315 |
| TLE2       | 0.01862053 | 1.331 | 0.846 | 0.514  | -0.43 | 0.163  | -1.427 | -1.002 | -7.287 | -2.138 |
| TMED1      | 0.00874296 | 0.543 | 0.465 | 0.036  | 1.076 | 0.6302 | -1.648 | -1.102 | -1.818 | -1.115 |
| TMEM119    | 0.00074085 | -0.4  | 0.466 | -0.172 | 0.085 | 1.9367 | -0.916 | -0.996 | -1.892 | -2.158 |
| TMEM25     | 0.00052457 | 1.266 | -0.12 | 1.474  | -0.17 | -0.486 | -1.045 | -0.925 | -4.096 | -2.871 |
| TMEM9B-AS1 | 0.04361249 | -0.62 | -0.45 | 0.534  | 1.565 | 0.9017 | -0.966 | -0.966 | -7.031 | -7.031 |
| TNFRSF21   | 0.01648881 | 0.447 | 0.32  | -0.663 | -0.32 | 1.9225 | -0.907 | -0.797 | -2.46  | -1.978 |
| TOR4A      | 0.03751673 | 0.482 | -0.32 | 1.86   | 0.403 | -0.708 | -0.68  | -1.038 | -1.552 | -3.178 |
| TPP1       | 0.00049575 | 1.338 | 0.25  | 0.725  | -0.37 | 0.5667 | -1.306 | -1.208 | -1.601 | -1.45  |
| TRIM14     | 0.0083662  | 1.622 | 0.524 | -0.185 | 0.658 | -0.404 | -1.184 | -1.032 | -1.813 | -1.508 |
| TRIM16     | 0.0056343  | 1.632 | -0.24 | 0.085  | 0.604 | 0.2935 | -1.238 | -1.134 | -1.926 | -1.701 |
| TRIM55     | 1.81E-06   | 1.027 | -0.28 | 1.582  | -0.66 | 0.2603 | -0.968 | -0.964 | -9.965 | -8.029 |
| TRIM7      | 0.00488864 | 0.882 | -0.59 | -0.331 | 1.687 | 0.2711 | -0.986 | -0.935 | -6.013 | -4.26  |
| TSPOAP1    | 0.00992749 | -0.33 | -0.11 | 1.204  | 0.904 | 0.7798 | -1.226 | -1.225 | -2.031 | -2.028 |
| TYRO3      | 0.00082187 | 1.321 | 0.903 | 0.13   | 0.169 | 0.0306 | -1.534 | -1.02  | -3.034 | -1.545 |
| VAT1L      | 0.03627585 | 0.487 | -0.78 | 0.933  | -0.52 | 1.5852 | -0.705 | -1.006 | -1.857 | -3.878 |
| ZNF385D    | 0.02443378 | 1.144 | 0.729 | 1.1    | -0.15 | -0.619 | -1.337 | -0.87  | -3.008 | -1.496 |
| ZNF521     | 0.0202337  | 1.498 | -0.23 | -0.91  | 0.325 | 1.0924 | -0.875 | -0.9   | -2.01  | -2.104 |
| ZNF578     | 0.02998066 | 1.278 | 0.267 | -0.343 | 1.119 | 0.0903 | -1.266 | -1.146 | -5.181 | -3.406 |
| ZNF853     | 0.0021976  | -0.31 | 0.44  | 1.33   | 1.147 | -0.381 | -1.114 | -1.114 | -6.393 | -6.393 |

**Table S4:** Overview of significantly (adjusted p-value <0.05, log2foldchange >2 or <2) up- or downregulated genes identified with RNA sequencing in individuals with *NAE1* genetic variants and healthy control fibroblasts. Heterozygous carriers (parents of individual 1) fibroblasts were also



included. The first column shows the adjusted (Bonferroni) p-value comparing individuals with healthy controls. The 3<sup>th</sup> to the 9<sup>th</sup> column show the Z-scores of all donors comparing the RPKM score of the gene to the RPKM of that gene in all other donors. The 10<sup>th</sup> and 11<sup>th</sup> columns show the log2foldchange in individual 1 and individual 2.

### **Bibliography:**

1. Richards S, Aziz N, Bale S, Bick D, Das S, Gastier-Foster J, et al. Standards and guidelines for the interpretation of sequence variants: A joint consensus recommendation of the American College of Medical Genetics and Genomics and the Association for Molecular Pathology. *Genet Med.* 2015;17(5):405–24.
2. Schwarz JM, Rödelberger C, Schuelke M, Seelow D. MutationTaster evaluates disease-causing potential of sequence alterations. *Nat Methods.* 2010;7(8):575–6.
3. Adzhubei IA, Schmidt S, Peshkin L, Ramensky VE, Gerasimova A, Bork P, et al. A method and server for predicting damaging missense mutations. *Nat Methods.* 2010;7(4):248–9.
4. Rentzsch P, Witten D, Cooper GM, Shendure J, Kircher M. CADD: Predicting the deleteriousness of variants throughout the human genome. *Nucleic Acids Res.* 2019;47(D1):D886–94.
5. Karczewski K.J., Francioli L.C., Tiao G., Cummings B.B., Alföldi J., Wang Q., et al. The mutational constraint spectrum quantified from variation in 141,456 humans. *Nature* 2020; 581:434–443..
6. Ishii A, Watkins JC, Chen D, Hirose S, Hammer MF. Clinical implications of SCN1A missense and truncation variants in a large Japanese cohort with Dravet syndrome. *Epilepsia.* 2017;58(2):282–90.
7. Köhler S, Gargano M, Matentzoglou N, Carmody LC, Lewis-Smith D, Vasilevsky NA, et al. The human phenotype ontology in 2021. *Nucleic Acids Res.* 2021;49(D1):D1207–17.
